# Supplementary material for: Designing and Engineering Methylorubrum extorquens AM1 for Itaconic Acid Production
Source: Front Microbiol. 2019 May 9;10:1027. doi: 10.3389/fmicb.2019.01027 (PMC6520949; doi:10.3389/fmicb.2019.01027)
Supplement: Supplementary file 2 [file Data_Sheet_2.xlsx]

## Sheet: List
Supplementary material 2
Table S3. List of the 184 significantly expressed genes used for codon optimization of the cad sequence
Number	Locus tag	Encoded product
1	MEXAM1_RS00280	30S ribosomal protein S1
2	MEXAM1_RS00435	glycosyl transferase family 1
3	MEXAM1_RS00510	phosphoglycerate dehydrogenase, SerA
4	MEXAM1_RS00820	ketol-acid reductoisomerase
5	MEXAM1_RS00855	oxidoreductase
6	MEXAM1_RS01105	3-deoxy-manno-octulosonate cytidylyltransferase
7	MEXAM1_RS01115	ABC transporter substrate-binding protein
8	MEXAM1_RS01360	formate/nitrite transporter family protein
9	MEXAM1_RS01570	formate--tetrahydrofolate ligase
10	MEXAM1_RS01595	response regulator
11	MEXAM1_RS01600	bifunctional riboflavin kinase/FAD synthetase
12	MEXAM1_RS01650	hypothetical protein
13	MEXAM1_RS02110	GatB/YqeY domain-containing protein
14	MEXAM1_RS02335	phosphoserine transaminase, SerC
15	MEXAM1_RS02860	DNA-binding response regulator CtrA
16	MEXAM1_RS02880	NADP-dependent malic enzyme, MaeB
17	MEXAM1_RS03015	glycine cleavage system protein T
18	MEXAM1_RS03300	nicotinate-nucleotide--dimethylbenzimidazole phosphoribosyltransferase
19	MEXAM1_RS03370	MarR family transcriptional regulator
20	MEXAM1_RS03445	glutathione synthase
21	MEXAM1_RS03680	hypothetical protein
22	MEXAM1_RS04140	pseudoazurin
23	MEXAM1_RS04590	hypothetical protein
24	MEXAM1_RS04685	formyl-CoA transferase
25	MEXAM1_RS04695	oxalyl-CoA decarboxylase
26	MEXAM1_RS04705	oxalate/formate MFS antiporter
27	MEXAM1_RS04710	oxalate/formate MFS antiporter
28	MEXAM1_RS04735	formyl-CoA transferase
29	MEXAM1_RS04890	flagellar protein FlbT
30	MEXAM1_RS05340	bifunctional diguanylate cyclase/phosphodiesterase
31	MEXAM1_RS05375	amino acid ABC transporter substrate-binding protein
32	MEXAM1_RS05455	universal stress protein
33	MEXAM1_RS05480	cytochrome bd oxidase subunit I
34	MEXAM1_RS06390	class II fumarate hydratase, FumC
35	MEXAM1_RS06395	formaldehyde-activating enzyme
36	MEXAM1_RS06505	ATP synthase subunit alpha
37	MEXAM1_RS06530	uracil-DNA glycosylase
38	MEXAM1_RS06705	malate dehydrogenase (quinone), Mqo
39	MEXAM1_RS06920	DUF883 domain-containing protein
40	MEXAM1_RS07145	flavodoxin-dependent (E)-4-hydroxy-3-methylbut-2-enyl-diphosphate synthase
41	MEXAM1_RS07165	methionine synthase
42	MEXAM1_RS07280	translation initiation factor IF-3
43	MEXAM1_RS07310	phenylalanine--tRNA ligase subunit beta
44	MEXAM1_RS07390	2-oxoglutarate dehydrogenase E1 component, SucA
45	MEXAM1_RS07395	dihydrolipoyllysine-residue succinyltransferase, SucB
46	MEXAM1_RS07400	dihydrolipoyl dehydrogenase
47	MEXAM1_RS08255	serine--glyoxylate aminotransferase, Sga
48	MEXAM1_RS08260	glycerate dehydrogenase, HprA
49	MEXAM1_RS08265	bifunctional NADP-dependent methylenetetrahydromethanopterin dehydrogenase/methylenetetrahydrofolate dehydrogenase, MtdA
50	MEXAM1_RS08270	methenyltetrahydrofolate cyclohydrolase
51	MEXAM1_RS08275	malate--CoA ligase subunit beta, MtkA
52	MEXAM1_RS08280	malate--CoA ligase subunit alpha, MtkB
53	MEXAM1_RS08285	phosphoenolpyruvate carboxylase (PEP carboxylase), Ppc
54	MEXAM1_RS08290	CoA ester lyase, Mcl
55	MEXAM1_RS08360	hypothetical protein
56	MEXAM1_RS08415	formyltransferase/hydrolase complex Fhc subunit B
57	MEXAM1_RS08450	5,6,7,8-tetrahydromethanopterin hydro-lyase (Formaldehyde activating enzyme), Fae
58	MEXAM1_RS08515	membrane protein
59	MEXAM1_RS08545	TonB-dependent receptor
60	MEXAM1_RS08685	NAD-dependent dehydratase
61	MEXAM1_RS08720	type I polyketide synthase [Type I PKS Terpene] / putative fatty acid synthase multidomain protein (rkpA-like; wcbR-like)
62	MEXAM1_RS09130	oxalate/formate MFS antiporter
63	MEXAM1_RS09195	homoserine dehydrogenase
64	MEXAM1_RS09420	hypothetical protein
65	MEXAM1_RS09440	carbon starvation protein A
66	MEXAM1_RS09455	LemA family protein
67	MEXAM1_RS09470	oxidoreductase
68	MEXAM1_RS09665	PrkA family serine protein kinase
69	MEXAM1_RS09720	acyl CoA:acetate/3-ketoacid CoA transferase
70	MEXAM1_RS09770	outer membrane protein assembly factor BamA
71	MEXAM1_RS10050	CsbD family protein
72	MEXAM1_RS10060	DUF2437 domain-containing protein
73	MEXAM1_RS10065	2-dehydropantoate 2-reductase
74	MEXAM1_RS10070	AMP-dependent synthetase
75	MEXAM1_RS10155	30S ribosomal protein S12
76	MEXAM1_RS10170	elongation factor Tu
77	MEXAM1_RS10475	phasin, Gap11
78	MEXAM1_RS10835	argininosuccinate synthase
79	MEXAM1_RS10865	DUF2059 domain-containing protein
80	MEXAM1_RS11120	YihA family ribosome biogenesis GTP-binding protein
81	MEXAM1_RS11205	fructose-bisphosphate aldolase class II
82	MEXAM1_RS11280	NAD(P)-dependent oxidoreductase
83	MEXAM1_RS11445	trigger factor
84	MEXAM1_RS11500	oligopeptide transporter, OPT family
85	MEXAM1_RS11625	CoA-binding protein
86	MEXAM1_RS11650	hypothetical protein
87	MEXAM1_RS11710	2,3-bisphosphoglycerate-dependent phosphoglycerate mutase, Pgm
88	MEXAM1_RS11985	acetate--CoA ligase
89	MEXAM1_RS12005	bifunctional phosphoribosylaminoimidazolecarboxamide formyltransferase/IMP cyclohydrolase PurH
90	MEXAM1_RS12715	DUF1236 domain-containing protein
91	MEXAM1_RS12775	4-hydroxy-3-methylbut-2-enyl diphosphate reductase
92	MEXAM1_RS13060	methylamine dehydrogenase light chain
93	MEXAM1_RS13325	EthD family reductase
94	MEXAM1_RS13355	L,D-transpeptidase
95	MEXAM1_RS13445	class II fumarate hydratase, FumC
96	MEXAM1_RS13520	inositol-3-phosphate synthase
97	MEXAM1_RS13605	ribosome-binding factor A
98	MEXAM1_RS13635	aspartate-semialdehyde dehydrogenase
99	MEXAM1_RS13685	DUF3416 domain-containing protein
100	MEXAM1_RS13700	1,4-alpha-glucan branching protein GlgB
101	MEXAM1_RS13850	pyruvate kinase
102	MEXAM1_RS13865	glycerate kinase, Gck
103	MEXAM1_RS13925	NAD(P)(+) transhydrogenase (Re/Si-specific) subunit alpha
104	MEXAM1_RS14075	pyruvate dehydrogenase (acetyl-transferring) E1 component subunit alpha, PdhA
105	MEXAM1_RS14080	pyruvate dehydrogenase complex E1 component subunit beta, PdhB
106	MEXAM1_RS14090	pyruvate dehydrogenase complex dihydrolipoamide acetyltransferase, PdhC
107	MEXAM1_RS14095	dihydrolipoyl dehydrogenase
108	MEXAM1_RS14210	xanthine dehydrogenase family protein molybdopterin-binding subunit
109	MEXAM1_RS14600	pyruvate, phosphate dikinase
110	MEXAM1_RS14710	ribonuclease D
111	MEXAM1_RS14730	CoA transferase subunit A, AtoD/ScoA (formally KstA)
112	MEXAM1_RS15090	chorismate synthase
113	MEXAM1_RS15115	acetyl/propionyl/methylcrotonyl-CoA carboxylase subunit alpha, PccA
114	MEXAM1_RS15385	flagellar motor switch protein FliM
115	MEXAM1_RS15515	inorganic triphosphatase
116	MEXAM1_RS15550	hypothetical protein
117	MEXAM1_RS15655	polyprenyl synthetase family protein
118	MEXAM1_RS15810	glycogen debranching enzyme GlgX
119	MEXAM1_RS15825	isocitrate dehydrogenase (NADP(+))
120	MEXAM1_RS15975	serine hydroxymethyltransferase, GlyA
121	MEXAM1_RS16100	DNA-directed RNA polymerase subunit omega
122	MEXAM1_RS16155	BA14K family protein
123	MEXAM1_RS16325	hypothetical protein
124	MEXAM1_RS16650	S-adenosylmethionine synthase
125	MEXAM1_RS16760	MexE family multidrug efflux RND transporter periplasmic adaptor subunit
126	MEXAM1_RS16795	chaperonin GroEL
127	MEXAM1_RS17140	beta-N-acetylhexosaminidase
128	MEXAM1_RS17200	aliphatic sulfonate ABC transporter substrate-binding protein
129	MEXAM1_RS17265	aldehyde dehydrogenase family protein
130	MEXAM1_RS17455	hopanoid biosynthesis associated radical SAM protein HpnH
131	MEXAM1_RS17500	acetyl-CoA C-acetyltransferase, PhaA
132	MEXAM1_RS17515	aminopeptidase
133	MEXAM1_RS17925	BON domain-containing protein
134	MEXAM1_RS17945	cytochrome c
135	MEXAM1_RS18220	succinate dehydrogenase flavoprotein subunit, SdhA_B
136	MEXAM1_RS18330	alpha/beta hydrolase
137	MEXAM1_RS18385	4-hydroxythreonine-4-phosphate dehydrogenase PdxA
138	MEXAM1_RS18510	dimethyl sulfone monooxygenase SfnG
139	MEXAM1_RS19385	hybrid-cluster NAD(P)-dependent oxidoreductase
140	MEXAM1_RS19555	MaoC family dehydratase, Mesaconyl-CoA hydratase Mcd
141	MEXAM1_RS20015	DUF4170 domain-containing protein
142	MEXAM1_RS20030	oxidoreductase
143	MEXAM1_RS20040	ferredoxin family protein
144	MEXAM1_RS20245	CoA ester lyase
145	MEXAM1_RS20340	MBL fold metallo-hydrolase
146	MEXAM1_RS20520	peptidase M4
147	MEXAM1_RS20550	alpha/beta hydrolase
148	MEXAM1_RS20680	50S ribosomal protein L11
149	MEXAM1_RS20770	50S ribosomal protein L7/L12
150	MEXAM1_RS20775	DNA-directed RNA polymerase subunit beta
151	MEXAM1_RS20780	DNA-directed RNA polymerase subunit beta'
152	MEXAM1_RS21385	SRPBCC family protein, MxaD
153	MEXAM1_RS21400	VWA domain-containing protein, MxaC
154	MEXAM1_RS21415	protein MoxR
155	MEXAM1_RS21430	possible chaperone protein MoxJ, MxaJ
156	MEXAM1_RS21435	methanol dehydrogenase [cytochrome c] subunit 1, MxaF
157	MEXAM1_RS21860	DUF815 domain-containing protein
158	MEXAM1_RS22110	NAD(P)H:quinone oxidoreductase
159	MEXAM1_RS22225	dihydroorotase
160	MEXAM1_RS22400	MFS transporter
161	MEXAM1_RS22415	efflux RND transporter periplasmic adaptor subunit
162	MEXAM1_RS22700	3-isopropylmalate dehydratase large subunit
163	MEXAM1_RS22840	elongation factor Tu
164	MEXAM1_RS22905	NADH-quinone oxidoreductase subunit E, Molybdenum-dependent formate DH, g subunit, Fdh2C
165	MEXAM1_RS22910	formate dehydrogenase subunit beta, Molybdenum-dependent formate DH, b subunit, Fdh2B
166	MEXAM1_RS22915	formate dehydrogenase subunit alpha, Molybdenum-dependent formate DH, Fdh2A
167	MEXAM1_RS22920	peptidase, Molybdenum-dependent formate DH, d subunit, Fdh2D
168	MEXAM1_RS23295	aminopeptidase P family protein
169	MEXAM1_RS23545	xanthine dehydrogenase family protein molybdopterin-binding subunit
170	MEXAM1_RS23595	gfo/Idh/MocA family oxidoreductase
171	MEXAM1_RS23635	beta-ketoacyl-ACP synthase II
172	MEXAM1_RS23765	peptidylprolyl isomerase
173	MEXAM1_RS23805	hypothetical protein
174	MEXAM1_RS23810	NADH-quinone oxidoreductase subunit F, Tungsten-dependent formate DH, b subunit, Fdh1B
175	MEXAM1_RS24120	FKBP-type peptidyl-prolyl cis-trans isomerase
176	MEXAM1_RS24290	citrate (Si)-synthase, GltA
177	MEXAM1_RS24570	50S ribosomal protein L19
178	MEXAM1_RS24825	chaperonin GroEL
179	MEXAM1_RS24885	methylmalonyl-CoA mutase, McmA
180	MEXAM1_RS24945	magnesium-protoporphyrin IX monomethyl ester (oxidative) cyclase
181	MEXAM1_RS24990	ferredoxin:protochlorophyllide reductase (ATP-dependent) subunit B
182	MEXAM1_RS24995	ferredoxin:protochlorophyllide reductase (ATP-dependent) subunit N
183	MEXAM1_RS25040	gluconate 2-dehydrogenase
184	MEXAM1_RS25225	ferritin-like domain-containing protein
