# Supplementary material for: Designing and Engineering Methylorubrum extorquens AM1 for Itaconic Acid Production
Source: Front Microbiol. 2019 May 9;10:1027. doi: 10.3389/fmicb.2019.01027 (PMC6520949; doi:10.3389/fmicb.2019.01027)
Supplement: Supplementary file 3 [file Data_Sheet_3.xlsx]

## Sheet: Reads
Supplementary material 3
Table S7. Expression level of coding sequences in the RNA-Seq experiment
*Expression level is reported as Transcripts Per Million (TPM)
Locus tag	Encoded product	WT_101 (replicate 1)	WT_101 (replicate 2)	WT_101 (replicate 3)	WT_CAD (replicate 1)	WT_CAD (replicate 2)	WT_CAD (replicate 3)	phaR_CAD (replicate 1)	phaR_CAD (replicate 2)	phaR_CAD (replicate 3)
Codon-optimized cad gene from Aspergillus terreus	cis-aconitic acid decarboxylase	0.22637	0.128786	0.125087	516.225	486.723	506.047	405.034	409.224	388.792
kmR	aminoglycosidephosphotransferase	24.7657	25.2715	25.7165	101.173	113.456	108.586	126.181	126.051	125.332
MEXAM1_RS00005	chromosomal replication initiator protein DnaA	3.78369	4.389	5.60307	5.11231	9.76226	7.44774	33.5398	28.0752	35.1402
MEXAM1_RS00010	DNA polymerase III subunit beta	15.7828	17.7959	16.5383	15.7884	16.3857	16.3484	32.8278	30.1884	29.5005
MEXAM1_RS00015	DNA replication and repair protein RecF	2.23768	2.64588	2.41348	2.56134	2.50067	3.00284	3.4294	3.24715	3.4414
MEXAM1_RS00020	LysE family translocator	18.5501	18.149	19.7564	17.8059	17.4256	15.6813	23.9109	23.1517	21.1268
MEXAM1_RS00025	DNA helicase RecQ	5.28129	5.56806	4.62894	4.33928	5.02641	4.62486	6.6228	5.73711	5.66146
MEXAM1_RS00030	hypothetical protein	2.96976	0.829564	1.05293	4.35459	2.26221	0.455223	1.78251	2.73538	2.97191
MEXAM1_RS00035	hypothetical protein	35.6182	40.2297	36.061	50.2776	45.5831	50.772	21.9955	29.7911	24.6407
MEXAM1_RS00040	ATP-dependent RecD-like DNA helicase	2.64526	2.46046	2.3265	3.52893	3.06495	3.32886	2.15092	1.93217	1.89511
MEXAM1_RS00045	hypothetical protein	2.37041	2.19032	1.79884	1.59198	2.14308	2.10373	1.94841	2.05389	2.05635
MEXAM1_RS00050	phosphoribosylformylglycinamidine synthase subunit PurL	9.61244	9.94139	8.83157	8.55035	8.90269	9.25322	10.3561	10.5548	10.6256
MEXAM1_RS00055	BolA family transcriptional regulator	96.1551	158.444	102.353	90.7518	135.719	116.278	115.388	114.881	103.781
MEXAM1_RS00060	monothiol glutaredoxin, Grx4 family	1033.62	1050.37	1115.03	934.934	987.56	897.428	716.584	732.443	705.238
MEXAM1_RS00065	NAD(P)/FAD-dependent oxidoreductase	40.1433	39.5781	39.9237	39.6573	36.1293	35.8006	25.1484	23.9704	25.8669
MEXAM1_RS00070	SMP-30/gluconolactonase/LRE family protein	41.723	37.7232	40.9715	36.7528	37.5654	33.1557	13.0109	16.095	15.6054
MEXAM1_RS00075	hypothetical protein	2212.66	1872.97	2103.94	1914.76	2497.59	2186.48	3134.46	3053.15	3043.93
MEXAM1_RS00080	hypothetical protein	18.4385	20.4059	20.8977	21.1433	28.4352	26.1256	48.577	38.3215	39.6464
MEXAM1_RS00085	hybrid sensor histidine kinase/response regulator	11.9893	12.5383	12.8974	14.3045	10.9358	12.0743	7.40092	6.9261	7.72542
MEXAM1_RS00090	circadian clock protein KaiC	17.306	17.7605	16.1339	18.2185	17.5984	15.1421	12.8527	11.6622	11.4664
MEXAM1_RS00095	DUF2252 domain-containing protein	15.7444	16.9313	15.4082	18.4899	17.2824	14.1703	6.825	6.82015	5.38655
MEXAM1_RS00100	KR domain-containing protein	62.0003	67.8962	69.5736	70.5915	59.4344	60.0929	15.3151	15.8537	13.1708
MEXAM1_RS00105	GntR family transcriptional regulator	1.90812	0.992212	1.16326	1.91331	1.92462	2.23845	1.52218	2.08925	2.92214
MEXAM1_RS00110	hypothetical protein	1.92676	1.61872	0.822692	3.40705	1.41637	2.49423	3.04968	1.2064	4.90605
MEXAM1_RS00115	malonate decarboxylase subunit alpha	1.84912	1.88834	1.78899	1.66548	1.94764	1.95503	1.44456	2.12021	1.86502
MEXAM1_RS00120	malonate decarboxylase acyl carrier protein	6.60306	9.96163	9.05906	10.3006	8.43594	10.8853	9.00867	9.38613	6.41494
MEXAM1_RS00125	biotin-independent malonate decarboxylase subunit beta	6.56469	7.26762	7.75438	5.65028	5.40101	5.61924	5.58464	7.85808	4.78359
MEXAM1_RS00130	biotin-independent malonate decarboxylase subunit gamma	6.04858	6.16123	6.31543	4.17856	4.36335	4.85891	6.05084	7.22253	4.13598
MEXAM1_RS00135	malonate decarboxylase holo-[acyl-carrier-protein] synthase	4.29528	2.7884	3.34645	2.15217	2.58932	2.05901	1.54209	2.81138	3.45351
MEXAM1_RS00140	triphosphoribosyl-dephospho-CoA synthase MdcB	1.43807	1.99903	1.4164	1.06517	1.45361	1.82462	0.977702	1.25862	1.1829
MEXAM1_RS00145	acyltransferase	2.26329	1.69507	1.81329	1.6556	1.84619	1.05931	1.4272	1.23691	1.0206
MEXAM1_RS00150	type II secretion system protein GspD	0.671222	0.721125	1.00671	1.04941	0.734142	1.11581	0.66762	0.923611	0.643424
MEXAM1_RS00155	general secretion pathway protein GspK	3.18873	3.58165	4.06997	3.27911	3.96878	3.49585	1.71619	1.09922	1.45608
MEXAM1_RS00160	prepilin-type N-terminal cleavage/methylation domain-containing protein	0.896783	0.871414	0.561066	1.15412	1.098	1.22555	0.460131	0.56497	0.191066
MEXAM1_RS00165	NA	0.636556	0.268194	1.02513	0.313671	0.588978	0	0.45752	0.246523	0.238163
MEXAM1_RS00170	NA	0.623484	0.528154	0.677042	0.206642	0.977061	0.589058	0.448272	0.156584	0.621378
MEXAM1_RS00175	SCO family protein	4.2248	3.99239	4.63031	2.93893	3.69388	3.59803	4.55066	3.26652	3.41115
MEXAM1_RS00180	hypothetical protein	9.96757	14.1376	14.8267	6.86705	7.39158	8.34089	12.0701	8.40393	9.65275
MEXAM1_RS00185	DUF1929 domain-containing protein	0.698273	0.650764	0.647109	0.821043	0.886827	0.704606	0.637175	0.864108	0.773182
MEXAM1_RS00190	type II secretion system protein GspG	1.68162	1.82815	1.81907	1.66736	0.898918	3.16141	2.59092	2.73984	3.95133
MEXAM1_RS00195	hypothetical protein	0.500212	0.24357	0.157393	0.215571	0.274666	0.344755	0.358949	0.619156	0.478564
MEXAM1_RS00200	NA	0	0.868627	0.445457	0.203941	0.192886	0.387621	0.294863	0.15437	0.61308
MEXAM1_RS00205	secretion system protein	1.43532	1.30595	1.21484	1.73536	1.98449	2.36295	3.3634	2.84619	3.48625
MEXAM1_RS00210	type II/IV secretion system protein	0.839175	0.955116	0.893689	0.940746	0.992069	1.08635	0.980751	1.06372	0.785298
MEXAM1_RS00215	hypothetical protein	0.219423	0.23389	0.423613	0.220948	0.528543	0.371458	0.314835	0.591045	0.326375
MEXAM1_RS00220	NA	0	0.140371	0.180376	0	0.313094	0.314553	0.475383	0.49193	0
MEXAM1_RS00225	exported hypothetical protein	2.01386	1.55282	1.39536	2.18907	1.38264	0.868313	1.18469	1.64297	1.23102
MEXAM1_RS00235	IS3 family transposase	13.3737	11.4706	11.9703	12.7556	11.0748	11.7578	9.66975	10.11	10.0734
MEXAM1_RS00240	integrase	5.29113	3.85774	4.90912	7.63884	6.82787	6.54075	6.59403	14.2974	12.1475
MEXAM1_RS00245	tRNA-Met	22.9283	34.7652	14.0077	28.512	26.1506	29.5104	35.4072	12.6676	16.7202
MEXAM1_RS00250	tryptophan synthase subunit beta	42.3031	41.8431	45.5782	39.297	37.7167	36.377	33.9839	39.6436	34.9476
MEXAM1_RS00255	phosphoribosylanthranilate isomerase	11.0642	12.9763	11.7443	11.3174	13.11	15.1777	10.203	8.86961	11.1971
MEXAM1_RS00260	DUF1049 domain-containing protein	55.8761	63.4538	65.404	64.3554	67.6318	69.4821	50.1811	55.7962	48.4833
MEXAM1_RS00265	integration host factor subunit beta	51.5039	46.4876	50.1733	45.709	54.8336	42.9364	51.6813	56.3168	50.3326
MEXAM1_RS00270	signal peptide peptidase SppA	28.723	29.0497	29.9478	28.2501	28.3146	26.6221	25.5185	28.3211	25.4981
MEXAM1_RS00275	putative sugar O-methyltransferase	4.24668	4.09898	4.83286	3.67512	3.27148	3.74149	3.1384	3.74511	3.66731
MEXAM1_RS00280	30S ribosomal protein S1	118.985	131.546	136.149	124.242	114.318	121.178	72.7606	74.9574	78.0906
MEXAM1_RS00285	23S rRNA (guanosine(2251)-2'-O)-methyltransferase RlmB	6.81109	8.20639	9.04485	10.2638	9.24097	9.04057	11.2673	11.5571	9.39839
MEXAM1_RS00290	NA	1.76318	12.2128	0	10.584	6.05331	5.0506	11.8849	3.56311	2.08721
MEXAM1_RS00295	hypothetical protein	4.59418	5.71842	5.34384	5.1143	4.98961	5.3826	5.84543	6.08379	5.68254
MEXAM1_RS00305	IS1380 family transposase	0.901773	0.877389	0.821376	0.98873	0.992862	0.879154	1.03643	1.06024	1.21139
MEXAM1_RS00310	DNA (cytosine-5-)-methyltransferase	4.3016	4.44075	4.84635	4.24903	4.15264	4.37723	10.3364	9.35859	10.4572
MEXAM1_RS00315	ATP-binding protein	1.80022	1.71718	2.14611	1.49526	1.9789	1.91796	2.78479	2.84774	2.9121
MEXAM1_RS00320	hypothetical protein	4.51909	5.24002	4.80624	4.36153	5.30017	4.65211	6.36979	6.56836	7.20834
MEXAM1_RS00325	PD-(D/E)XK motif protein	5.03754	4.0293	3.90775	3.94294	3.83049	4.08643	4.01601	4.61183	4.44135
MEXAM1_RS00330	hypothetical protein	23.3375	5.7531	15.0457	10.3701	13.904	11.7802	7.26275	22.0467	20.4001
MEXAM1_RS00335	DUF3768 domain-containing protein	4.41557	6.95262	5.8664	8.10025	7.56601	6.08654	4.38197	3.49702	6.629
MEXAM1_RS00340	XRE family transcriptional regulator	8.47174	4.50769	7.33066	9.01948	7.05681	6.3608	15.4265	2.42547	4.61586
MEXAM1_RS00350	hypothetical protein	2.91978	2.49203	2.54438	3.32619	2.92228	2.90007	2.21724	2.32913	2.98697
MEXAM1_RS00355	DUF927 domain-containing protein	13.3614	14.7509	14.5575	15.687	18.6068	15.8234	26.1235	29.7367	27.653
MEXAM1_RS00360	hypothetical protein	10.0671	12.4812	12.0303	12.6933	10.5007	10.8593	4.40912	4.94662	4.32842
MEXAM1_RS00365	hypothetical protein	152.734	161.901	176.378	144.341	129.824	127.017	65.5748	71.082	63.7138
MEXAM1_RS00370	pirin family protein	7.11107	7.03274	7.76097	5.12877	6.70901	4.92287	9.57927	10.2065	8.38528
MEXAM1_RS00375	potassium transporter	3.43557	2.95871	3.05996	3.03698	2.70579	2.45031	3.09614	3.31604	3.43416
MEXAM1_RS00380	cytochrome c biogenesis protein	1.6749	2.68354	3.02946	1.48284	2.3564	1.79874	2.4755	3.94609	2.86186
MEXAM1_RS00385	(Fe-S)-cluster assembly protein	6.47983	7.34602	7.93039	7.37674	6.53459	6.68581	2.37283	3.64079	2.9369
MEXAM1_RS00390	hypothetical protein	15.8321	14.0942	16.7141	23.4184	13.7766	9.55527	16.038	9.34942	12.4324
MEXAM1_RS00395	hypothetical protein	290.175	280.427	261.122	387.282	449.531	383.028	451.194	410.491	469.729
MEXAM1_RS00400	HAMP domain-containing protein	1.56088	1.52269	1.58517	0.739157	1.17069	1.1442	8.97819	6.97454	7.57534
MEXAM1_RS00405	ABC transporter ATP-binding protein	10.7515	11.6716	10.5127	10.9808	10.4601	9.84766	5.8554	7.19244	6.61707
MEXAM1_RS00410	hypothetical protein	27.5277	32.3691	31.6078	23.2747	33.789	24.9952	13.7201	12.6655	14.2777
MEXAM1_RS00415	hypothetical protein	260.145	331.819	327.306	337.51	328.217	295.336	89.9763	106.527	103.512
MEXAM1_RS00420	hypothetical protein	1.76034	2.09601	1.41482	2.23359	2.46258	1.57414	1.68543	2.66479	1.48691
MEXAM1_RS00425	hypothetical protein	3.36278	3.98351	5.26409	3.84929	2.86283	3.91103	3.70891	3.25809	3.13346
MEXAM1_RS00430	hypothetical protein	2.39238	2.25405	2.35944	2.85087	2.84728	2.79804	2.07791	2.35752	2.2949
MEXAM1_RS00435	glycosyl transferase family 1	1.4815	1.1794	1.74433	2.23872	1.85734	1.52998	0.602236	0.672826	0.918014
MEXAM1_RS00440	glycosyltransferase family 4 protein	2.68662	2.88822	3.47802	3.35124	3.48697	3.21868	1.88563	2.26794	2.51961
MEXAM1_RS00445	haloacid dehalogenase	10.6522	10.1202	9.24327	9.79824	9.34817	8.21635	5.01921	4.70932	5.88373
MEXAM1_RS00450	sugar transferase	3.4399	4.36338	3.61807	3.45765	3.3762	3.97998	2.52349	2.43236	3.35659
MEXAM1_RS00455	glycosyl transferase	1.74648	2.62858	2.15415	3.3113	3.11982	3.82823	1.76878	1.29	1.9099
MEXAM1_RS00460	glycosyl transferase	4.60875	3.41571	3.90051	3.42678	3.40429	4.77267	2.58808	4.04521	3.47863
MEXAM1_RS00465	glycosyltransferase family 4 protein	1.37554	0.879646	1.20103	0.63471	1.26962	0.720496	0.534555	0.824011	0.511545
MEXAM1_RS00470	class I SAM-dependent methyltransferase	1.32708	1.78757	1.81941	2.66029	0.84478	1.37895	2.30275	2.34428	1.15366
MEXAM1_RS00475	two-component system response regulator	0.912967	1.41974	1.83683	1.35206	2.27718	2.02646	4.27654	4.12612	5.59143
MEXAM1_RS00480	excinuclease ABC subunit UvrA	1.25236	1.21545	1.30271	1.41812	1.56315	1.75346	1.26534	0.997447	1.36726
MEXAM1_RS00485	GlxA family transcriptional regulator	9.60953	8.5808	10.0132	7.8922	13.3302	11.7432	4.83127	5.37061	6.46832
MEXAM1_RS00490	SDR family oxidoreductase	4.03495	3.87486	4.15366	3.01792	3.53891	5.62055	4.31331	4.42105	4.85737
MEXAM1_RS00495	(2Fe-2S)-binding protein	25.3128	25.6081	23.297	18.299	17.4913	23.5823	51.0274	54.6344	47.932
MEXAM1_RS00500	xanthine dehydrogenase family protein molybdopterin-binding subunit	5.8057	6.44684	6.62928	5.81516	5.57857	5.71078	8.78698	9.25387	8.09801
MEXAM1_RS00505	C4-dicarboxylate ABC transporter	1.15818	1.66294	2.28494	2.14724	1.64289	1.82628	4.98583	3.72885	4.21693
MEXAM1_RS00510	phosphoglycerate dehydrogenase	0.830134	1.57369	1.62956	1.76596	2.31395	1.83161	2.87812	2.9403	2.50311
MEXAM1_RS00515	FAD-binding oxidoreductase	3.29632	3.94464	3.37552	3.32326	3.33893	2.92311	4.8728	4.94391	4.75127
MEXAM1_RS00520	cytochrome c	1.46944	1.05767	2.10703	2.0389	1.07888	1.62554	1.13628	0.99225	1.43194
MEXAM1_RS00525	4Fe-4S dicluster domain-containing protein	1.50813	1.36477	1.53098	1.36005	1.35745	1.48469	1.06849	1.28771	1.04024
MEXAM1_RS00530	polysulfide reductase NrfD	1.60561	1.40512	1.54641	2.15814	1.7095	1.87576	1.8899	1.59011	1.9893
MEXAM1_RS00535	DUF3341 domain-containing protein	0.691179	1.75965	1.69505	1.55088	1.30711	1.47743	1.11788	1.93225	1.80682
MEXAM1_RS00540	cytochrome c	1.17004	1.27696	1.27611	0.667067	0.949242	0.317882	0.961117	0.62195	0.748901
MEXAM1_RS00545	hypothetical protein	0.653709	0.668634	1.36872	0.460378	0.754541	0.947035	0.562867	0.70666	1.11858
MEXAM1_RS00550	hypothetical protein	1.1961	0.870129	1.30395	1.36343	1.77781	1.9486	1.35105	1.65495	1.78658
MEXAM1_RS00555	cytochrome c oxidase subunit II	1.32126	1.12669	2.18635	1.38586	0.689549	0.639051	1.26386	1.02822	1.71963
MEXAM1_RS00560	cytochrome c oxidase subunit I	1.82329	1.44712	1.94548	1.51673	1.51584	1.77	2.66111	2.66924	2.85261
MEXAM1_RS00565	cytochrome b561	1.36863	1.25419	2.19519	2.32259	1.91164	2.8297	2.7211	3.68789	3.05889
MEXAM1_RS00570	oxidase	17.528	13.533	11.1231	10.9512	14.1012	20.5861	18.6313	21.043	30.8651
MEXAM1_RS00575	hypothetical protein	69.6135	51.0397	68.2524	53.0118	60.894	75.0362	60.5499	71.0923	64.7118
MEXAM1_RS00580	RNA polymerase sigma factor	10.2516	8.70298	9.9207	7.91972	7.6708	7.54928	6.53651	6.51807	8.2721
MEXAM1_RS00585	hypothetical protein	2.41242	3.27139	3.53567	2.51201	4.19469	2.92315	1.98814	3.4384	3.12669
MEXAM1_RS00590	catalase	1.44495	2.46449	1.77141	1.29347	2.16616	1.6052	1.99643	2.38236	2.54715
MEXAM1_RS00595	cytochrome b	2.9288	3.48354	2.08048	2.488	1.80768	1.5367	2.4199	3.68072	3.05917
MEXAM1_RS00600	K(+)-transporting ATPase subunit F	14.8979	25.284	28.2964	15.4823	6.80529	28.2175	30.2014	23.074	20.8191
MEXAM1_RS00605	potassium-transporting ATPase subunit KdpA	1.60461	2.14855	1.87888	1.61889	2.03885	1.52729	2.48205	2.87183	3.2734
MEXAM1_RS00610	NA	7.42514	10.4708	3.91221	1.80681	8.98265	1.74427	13.6851	5.01105	8.0568
MEXAM1_RS00615	K(+)-transporting ATPase subunit B	0.901605	0.940902	1.19174	1.16292	1.11542	0.924866	1.84982	1.90715	1.93521
MEXAM1_RS00620	K(+)-transporting ATPase subunit C	2.47546	2.43686	4.13587	2.99897	2.60461	4.1115	5.33475	3.92863	4.9553
MEXAM1_RS00625	sensor histidine kinase KdpD	1.94219	1.81828	2.15069	1.98041	1.82809	1.7803	2.37011	1.84377	2.41378
MEXAM1_RS00630	DNA-binding response regulator	3.5394	3.56842	2.66098	3.3659	2.67555	3.67248	4.27902	3.92734	3.81482
MEXAM1_RS00635	hypothetical protein	8.36131	10.3333	13.3503	19.2504	27.9422	18.4988	24.2411	28.2165	18.96
MEXAM1_RS00640	C4-dicarboxylate ABC transporter substrate-binding protein	6.8481	6.05552	5.68539	5.3553	5.16984	5.67265	7.23398	7.86746	8.14527
MEXAM1_RS00645	hypothetical protein	4.22639	6.28944	5.39572	4.04903	4.12862	4.66377	3.85096	3.77304	4.24255
MEXAM1_RS00650	TIGR04290 family methyltransferase	3.0906	2.92442	1.60482	1.46585	1.2345	2.47966	1.91018	2.61527	1.46999
MEXAM1_RS00655	histidine phosphatase family protein	2.07199	2.13209	2.08841	2.1677	1.90341	1.66228	0.309829	1.06468	1.09265
MEXAM1_RS00660	myo-inositol-1-phosphate synthase	3.81264	3.4835	3.42508	2.24872	2.15178	1.73883	2.42264	3.3642	1.62027
MEXAM1_RS00665	NAD-dependent epimerase/dehydratase family protein	6.48294	8.91363	8.75945	3.82159	3.88066	5.13859	3.85506	5.45985	3.47532
MEXAM1_RS00670	glycosyl transferase	2.6132	3.27459	3.35406	1.77237	1.23354	1.44486	1.49212	1.87618	2.06236
MEXAM1_RS00675	hypothetical protein	3.71858	4.22818	5.35136	2.22513	1.8177	1.92923	2.28111	1.93498	2.16428
MEXAM1_RS00680	hypothetical protein	2.94557	3.67838	4.12089	1.9071	1.92656	2.29052	2.15086	1.73677	1.79934
MEXAM1_RS00685	glycosyl transferase family 1	2.9102	2.9873	2.73514	1.5196	1.97351	1.92923	1.62384	1.31578	0.601189
MEXAM1_RS00690	B12-binding domain-containing radical SAM protein	4.89835	6.47553	6.677	2.66853	2.51301	2.73661	3.29202	3.12766	2.98552
MEXAM1_RS00695	KR domain-containing protein	6.25355	6.7828	6.95936	3.25899	3.01269	2.12262	4.01415	3.30985	3.42694
MEXAM1_RS00700	dehydratase	16.5366	17.936	16.4151	7.54525	6.18903	5.28164	8.13931	10.9127	8.11905
MEXAM1_RS00705	DUF2971 domain-containing protein	13.5831	14.1777	13.4709	4.96985	9.36831	8.5979	33.3025	30.5631	24.1083
MEXAM1_RS00710	hypothetical protein	5.76681	5.15059	6.94243	4.60975	5.31412	5.67664	10.3692	7.3102	10.525
MEXAM1_RS00715	hypothetical protein	3.51546	3.16212	0.952839	1.09095	1.03087	1.243	1.26368	3.65351	3.61362
MEXAM1_RS00720	AraC family transcriptional regulator	0.681349	1.21448	0.751103	0.99736	0.417286	1.01752	1.06661	1.38232	0.967615
MEXAM1_RS00725	pilus biosynthesis protein PilZ	1.95976	2.94509	2.47021	2.71095	1.00133	2.01206	1.08321	1.11601	1.91237
MEXAM1_RS00730	alpha/beta hydrolase	0.438973	0.997433	0.48335	0.662037	1.54624	0.846915	0.472519	0.422836	0.381111
MEXAM1_RS00735	AraC family transcriptional regulator	0.309704	0.211215	0.341411	0.24934	0.178837	0.598543	0.0888842	0.312136	0.276462
MEXAM1_RS00745	flagellin	1.30126	1.31913	1.40561	1.80404	1.45653	0.976055	1.49793	1.79081	1.55683
MEXAM1_RS00750	integrase	1.38154	0.777259	1.28476	1.36216	1.24512	1.31079	2.54453	2.32854	2.42669
MEXAM1_RS00755	resolvase	22.0298	21.6031	17.448	24.9691	22.1763	22.2805	25.07	25.0408	25.4825
MEXAM1_RS00760	hypothetical protein	1.80896	1.71506	1.5101	1.45899	2.36831	1.63694	4.12314	3.21929	4.30303
MEXAM1_RS00765	NA	1.86224	11.7992	2.02117	8.847	11.3421	8.68231	5.49116	5.2441	13.012
MEXAM1_RS00770	replication-associated recombination protein A	6.20345	4.62638	4.64769	4.89707	5.10888	4.91857	4.35635	5.24735	5.25687
MEXAM1_RS00775	carboxypeptidase M32	9.27251	10.1288	9.79732	8.1164	8.78086	8.95843	8.83184	8.47842	7.3883
MEXAM1_RS00780	Hsp70 family protein	2.91423	3.90659	4.18827	3.07641	3.16888	2.68842	2.85362	2.84987	2.95777
MEXAM1_RS00785	RluA family pseudouridine synthase	5.37463	5.0343	5.49166	5.62216	4.68335	4.89734	6.43469	5.63491	6.03799
MEXAM1_RS00790	haloacid dehalogenase	3.89376	2.9649	2.58712	4.21397	3.62488	3.05052	4.04603	5.60361	4.04554
MEXAM1_RS00795	ATPase	17.4544	15.0792	14.7887	13.2556	15.778	18.3391	13.8461	13.7402	16.4126
MEXAM1_RS00800	acyl-CoA carboxylase subunit beta	21.9717	21.575	23.9288	20.9259	19.8103	22.4328	28.4218	28.0671	31.4315
MEXAM1_RS00805	TerB family tellurite resistance protein	7.15533	5.56031	7.6493	5.47483	5.7773	8.27135	5.46991	4.736	5.5671
MEXAM1_RS00810	tRNA-Val	20.1708	21.983	9.67004	23.814	18.1599	27.7783	25.4677	15.1432	12.5233
MEXAM1_RS00815	TetR/AcrR family transcriptional regulator	3.84335	2.17923	2.55311	2.10013	3.22196	2.67841	2.09077	3.07025	4.07955
MEXAM1_RS00820	ketol-acid reductoisomerase	38.1021	49.5704	47.7011	36.0557	37.0856	37.1776	23.9362	24.5205	24.548
MEXAM1_RS00825	pyridoxamine 5'-phosphate oxidase	9.06317	7.41626	8.55262	6.66708	6.02094	6.81759	4.03654	5.1221	5.12977
MEXAM1_RS00830	class I SAM-dependent methyltransferase	1.85034	2.05582	0.973669	1.53592	1.46662	1.16279	1.6744	1.74756	2.21562
MEXAM1_RS00835	crotonyl-CoA carboxylase/reductase	44.0467	50.0793	55.8878	40.7118	40.476	43.4904	65.6514	70.026	55.6134
MEXAM1_RS00840	catalase	11.5826	13.8445	15.9694	17.4624	18.0808	15.8449	3.84252	3.20781	4.12236
MEXAM1_RS00845	protein meaA	24.7922	24.1584	24.5423	21.6188	21.6687	23.0811	33.9921	34.082	28.1115
MEXAM1_RS00850	DUF2490 domain-containing protein	10.3886	10.9143	8.60811	9.88545	9.3192	9.97126	15.2979	16.0176	18.2436
MEXAM1_RS00855	oxidoreductase	9.68677	10.3881	10.951	8.97572	12.04	11.0174	8.02317	9.68292	9.57172
MEXAM1_RS00860	ArsR family transcriptional regulator	72.4858	60.7775	55.3467	65.1214	81.9023	83.8546	99.9193	95.7017	80.2507
MEXAM1_RS00865	tryptophan--tRNA ligase	28.1602	25.9032	25.9142	28.0075	27.5073	30.0935	38.8554	36.2691	39.4772
MEXAM1_RS00870	3-isopropylmalate dehydratase small subunit	29.1843	31.5684	30.6625	34.2926	30.7592	27.7838	20.1223	21.1763	23.6105
MEXAM1_RS00875	peptidase C15	4.99943	3.61349	3.28542	2.87819	4.88225	4.54547	4.66821	3.67091	3.72756
MEXAM1_RS00880	methylmalonyl Co-A mutase-associated GTPase MeaB	7.18117	7.71867	6.26391	6.66101	5.22805	6.33536	10.7082	10.6108	9.75506
MEXAM1_RS00885	alpha/beta hydrolase	5.06134	3.51245	4.9323	3.19909	3.85347	3.24314	16.3409	13.8832	12.3884
MEXAM1_RS00890	hypothetical protein	169.463	156.467	177.251	147.219	116.791	129.152	208.624	199.022	182.375
MEXAM1_RS00895	S9 family peptidase	6.24869	6.32434	7.41304	6.93372	7.74321	6.45401	6.30603	5.45868	5.86176
MEXAM1_RS00900	L,D-transpeptidase	16.6088	15.8646	13.9502	11.1363	15.8325	15.0295	42.408	33.5545	33.0061
MEXAM1_RS00905	hypothetical protein	30.2221	29.1767	45.6149	34.4356	58.0548	36.1505	95.4163	89.1972	87.5637
MEXAM1_RS00910	exonuclease SbcCD subunit D	2.7292	3.35414	3.57535	4.10188	4.64175	2.82284	4.91089	4.73874	5.606
MEXAM1_RS00915	chromosome segregation protein SMC	1.81822	1.58703	1.75179	1.5443	1.64879	1.92413	1.26582	1.15847	1.42867
MEXAM1_RS00920	NarK/NasA family nitrate transporter	2.1025	1.91058	1.86742	1.84236	2.24932	1.77108	1.73766	2.29164	2.41274
MEXAM1_RS00925	ComF family protein	30.2893	31.7248	26.9104	32.5664	35.0128	28.8876	9.87655	8.04455	10.2449
MEXAM1_RS00930	hypothetical protein	1426.51	1320.13	1477.96	1655.1	1652.61	1443.27	511.71	541.274	498.924
MEXAM1_RS00935	methyltransferase domain-containing protein	12.492	14.9271	11.6221	12.5613	12.9	12.5379	11.1795	11.9758	10.4709
MEXAM1_RS00940	nucleotidyltransferase domain-containing protein	7.62306	7.82549	7.67619	8.72803	8.54434	8.59211	8.84185	5.66615	9.2012
MEXAM1_RS00945	hypothetical protein	2.67819	2.34665	2.40782	2.98919	2.62304	2.59842	1.43422	1.27489	1.22087
MEXAM1_RS00950	(deoxy)nucleoside triphosphate pyrophosphohydrolase	5.85597	2.82511	5.71108	8.27101	6.2249	3.65143	5.01504	4.70907	3.75393
MEXAM1_RS00955	DUF541 domain-containing protein	6.46109	5.58298	6.55822	6.4832	5.71353	4.60969	7.02768	7.76901	6.85368
MEXAM1_RS00960	bifunctional glutamate N-acetyltransferase/amino-acid acetyltransferase ArgJ	6.03166	6.25358	6.8136	5.18954	6.22249	5.39298	8.18739	8.2102	7.4513
MEXAM1_RS00965	sensor histidine kinase	30.1274	31.7624	33.161	30.1559	31.8778	29.4444	67.5586	70.6826	67.2491
MEXAM1_RS00970	glutathione peroxidase	54.1979	63.7496	57.7023	52.9233	44.6296	51.5146	66.9517	69.2358	60.1019
MEXAM1_RS00975	hypothetical protein	50.4121	47.1505	34.9126	38.5972	44.9185	51.7587	66.7646	55.0844	63.3765
MEXAM1_RS00980	hypothetical protein	205.296	155.97	198.988	185.207	232.966	263.066	156.882	139.062	181.035
MEXAM1_RS00985	DUF2188 domain-containing protein	407.066	446.879	449.945	517.18	495.801	447.675	170.811	141.356	158.018
MEXAM1_RS00990	bifunctional proline dehydrogenase/L-glutamate gamma-semialdehyde dehydrogenase PutA	6.1943	6.28826	6.16697	7.28269	7.00619	6.85062	5.41217	5.9953	5.44333
MEXAM1_RS00995	AsmA family protein	3.07836	3.30212	3.19246	4.06178	3.27215	3.35243	2.15673	1.93416	2.12976
MEXAM1_RS01000	hypothetical protein	141.792	161.032	162.866	177.47	194.853	169.616	66.9611	71.0279	79.9789
MEXAM1_RS01005	ATPase AAA	4.3769	4.56631	3.96217	4.59364	4.26103	4.65412	4.68456	4.92035	5.10966
MEXAM1_RS01010	PhoH family protein	114.031	102.462	114.222	99.3899	104.626	109.849	119.095	124.444	112.336
MEXAM1_RS01015	aquaporin Z	269.471	234.786	214.64	203.659	165.184	177.417	277.634	319.328	238.802
MEXAM1_RS01020	DNA polymerase III	13.6407	13.6424	12.1756	12.056	12.6241	12.5379	12.9312	15.1382	14.2106
MEXAM1_RS01025	cupin domain-containing protein	10.2864	9.87626	9.45466	9.39986	8.72251	7.7375	5.97175	5.69238	5.51396
MEXAM1_RS01030	glutamine-synthetase adenylyltransferase	4.23752	4.18633	3.80737	3.38646	3.08525	3.59328	4.9785	4.95346	4.95525
MEXAM1_RS01035	hypothetical protein	2.165	2.76303	3.5628	2.6045	1.96464	1.55798	2.0985	1.97683	1.20981
MEXAM1_RS01040	hypothetical protein	43.7484	46.2125	31.9587	30.5718	40.519	38.0258	37.7508	26.9464	29.7724
MEXAM1_RS01045	two-component sensor histidine kinase	1.13312	1.33369	1.12257	1.33947	1.3588	1.55348	1.51336	1.08923	1.04559
MEXAM1_RS01050	DNA-binding response regulator	2.57891	3.59925	3.9631	3.20741	2.46544	3.0707	2.07366	2.40747	2.45907
MEXAM1_RS01055	OsmC family peroxiredoxin	32.1893	34.1338	28.6331	30.6592	27.3672	26.3082	16.0694	16.4292	14.0265
MEXAM1_RS01060	ABC transporter ATP-binding protein	6.11208	3.71769	6.23987	4.9105	4.35163	4.95862	5.1391	5.00548	5.78561
MEXAM1_RS01065	ABC transporter permease	1.4895	2.27062	1.898	1.89088	1.95634	2.11577	1.85663	2.21238	1.98384
MEXAM1_RS01070	LysE family translocator	2.42093	2.67652	1.85678	2.30336	2.30798	3.36159	2.43419	1.68666	2.07544
MEXAM1_RS01075	aliphatic sulfonate ABC transporter substrate-binding protein	4.84438	5.65081	5.62034	4.87448	6.07143	6.83511	5.80841	5.73915	5.92743
MEXAM1_RS01080	[protein-PII] uridylyltransferase	4.85044	5.05818	4.22472	4.77057	4.27889	4.27689	6.42171	6.76032	6.34236
MEXAM1_RS01085	nucleotide exchange factor GrpE	95.3425	90.6171	88.819	77.9703	99.0201	89.0916	94.9371	95.7468	109.347
MEXAM1_RS01090	hypothetical protein	89.7542	101.483	110.471	98.2524	83.6255	104.052	88.4624	108.504	96.9079
MEXAM1_RS01095	hypothetical protein	51.4444	67.8958	63.6191	76.079	64.8206	78.9334	59.2069	49.1728	53.8122
MEXAM1_RS01100	prephenate dehydratase	3.11859	3.49938	4.2701	3.66999	4.45522	4.98727	5.29487	4.73002	4.24564
MEXAM1_RS01105	3-deoxy-manno-octulosonate cytidylyltransferase	5.34151	5.42507	5.766	7.14884	6.63939	4.5957	6.92867	5.85991	8.09508
MEXAM1_RS01115	ABC transporter substrate-binding protein	6.31856	7.76041	7.84873	6.46068	6.62457	6.81093	6.4192	5.82306	6.5689
MEXAM1_RS01120	ABC transporter substrate-binding protein	5.44881	5.49973	5.96486	5.04048	4.31152	5.70596	3.60224	3.94249	3.20532
MEXAM1_RS01125	microcin C ABC transporter permease YejB	11.1111	12.2619	11.4169	10.6403	10.549	11.4868	8.67461	10.4838	9.60011
MEXAM1_RS01130	N-acetyltransferase	2.5631	2.79507	1.99337	3.10118	2.07396	2.25761	2.36938	2.46446	1.09424
MEXAM1_RS01135	AMP-dependent synthetase	3.69655	2.97283	3.18251	3.11878	3.16063	3.37962	2.34529	2.61396	2.66818
MEXAM1_RS01140	glycosyltransferase family 2 protein	2.17054	1.62656	2.00466	1.56951	1.49793	2.00581	2.61731	1.51181	2.39161
MEXAM1_RS01145	tRNA-Ser	28.7742	18.7663	17.1539	27.6441	20.9521	23.0348	54.6488	56.4282	32.4294
MEXAM1_RS01155	IS3 family transposase	13.3737	11.4706	11.9703	12.7556	11.0748	11.7578	9.66975	10.11	10.0734
MEXAM1_RS01160	cytochrome C	6.42707	4.27237	4.97189	6.14963	3.87112	5.61886	7.26142	9.22293	8.75307
MEXAM1_RS01165	dicarboxylate transporter/tellurite-resistance protein TehA	1.62009	0.716187	1.25703	1.63066	1.50191	0.927989	1.76508	1.64046	1.65141
MEXAM1_RS01170	PLP-dependent aminotransferase family protein	0.444518	1.03445	0.937601	0.285182	0.624447	0.94029	0.753612	1.12698	0.841113
MEXAM1_RS01175	DUF983 domain-containing protein	7.20756	5.8227	7.4241	9.47975	8.35076	6.99967	19.6496	21.7742	20.666
MEXAM1_RS01180	5-aminolevulinate synthase	2.50371	3.02475	1.5865	4.21974	2.6338	3.52769	2.65065	3.00586	3.14497
MEXAM1_RS01185	PLP-dependent aminotransferase family protein	2.37797	2.61373	2.4492	1.86915	2.41342	2.93074	4.13397	3.66015	3.74509
MEXAM1_RS01190	hypothetical protein	0.399493	1.69259	1.30247	1.19244	1.50439	1.32261	2.44139	1.0509	0.746417
MEXAM1_RS01195	Nit6803 family nitriliase	0.390978	0.714408	0.431277	0.393664	0.699496	0.37816	0.280498	0.280928	0.789273
MEXAM1_RS01200	MSMEG_0568 family radical SAM protein	0.811237	0.737921	0.775683	0.544619	0.677505	0.784855	1.82356	1.86423	1.12618
MEXAM1_RS01205	GNAT family N-acetyltransferase	5.17772	6.12951	6.16709	7.67724	5.80135	4.33383	3.60827	4.30632	5.38743
MEXAM1_RS01210	sll0787 family AIR synthase-like protein	0.805231	0.475233	0.273129	0.62335	0.596123	0.538689	0.488863	0.847226	0.691154
MEXAM1_RS01215	MSMEG_0565 family glycosyltransferase	0.698108	0.467843	0.440311	1.15534	0.817437	0.386196	0.894281	0.321862	0.889898
MEXAM1_RS01220	NA	1.75258	4.39342	3.71214	3.42945	1.61772	4.04014	0	0.682567	0
MEXAM1_RS01225	MSMEG_0569 family flavin-dependent oxidoreductase	1.35905	1.31399	1.00052	0.913053	1.22407	1.80295	1.52729	1.07064	1.21251
MEXAM1_RS01230	transporter	1.15051	0.692155	0.596491	0.408454	0.780869	0.71874	0.631307	1.07377	1.00707
MEXAM1_RS01235	hypothetical protein	1.88468	1.07034	1.20986	1.02596	1.35667	1.66519	2.98694	1.93211	2.04568
MEXAM1_RS01240	hypothetical protein	29.8358	26.5757	30.5485	21.33	29.6271	29.7133	34.4828	35.4114	45.8144
MEXAM1_RS01245	AraC family transcriptional regulator	3.33392	2.78597	4.03411	2.95957	2.76665	3.21992	4.54984	4.61684	5.49564
MEXAM1_RS01250	DUF3817 domain-containing protein	1.80189	2.27845	1.61394	1.48121	1.39179	0.559973	4.75045	2.77969	2.47093
MEXAM1_RS01255	hypothetical protein	2.40252	5.31638	2.5823	4.73988	5.56717	5.31975	5.83009	7.64414	8.98522
MEXAM1_RS01260	IS3 family transposase	13.3737	11.4706	11.9703	12.7556	11.0748	11.7578	9.66975	10.11	10.0734
MEXAM1_RS01270	hypothetical protein	3.95292	11.099	14.5085	22.9137	9.57508	16.8418	28.8222	35.9165	20.305
MEXAM1_RS01275	hypothetical protein	2.12343	4.42082	1.12488	5.23876	5.93778	4.96613	4.53636	8.07681	6.28072
MEXAM1_RS01280	hypothetical protein	1.92168	1.52498	1.82346	2.82119	1.70801	2.08344	3.40497	4.61392	4.29899
MEXAM1_RS01285	IS256 family transposase	2.98373	3.20813	3.39494	3.56506	3.34035	3.45914	1.33084	1.48503	1.48502
MEXAM1_RS01290	hypothetical protein	0.815255	0.0990561	0.893589	0.816716	1.11102	1.0044	0.752678	0.767562	1.12839
MEXAM1_RS01300	IS3 family transposase	1.08644	1.09516	1.14472	0.547242	0.428617	0.95624	1.45245	1.31024	1.0649
MEXAM1_RS01305	hypothetical protein	1.70849	2.11056	3.22243	2.32677	3.24025	3.99533	2.90198	4.49086	3.70964
MEXAM1_RS01310	PAS domain S-box protein	2.97204	2.53622	2.86335	2.42053	1.61977	2.14336	2.84221	3.21281	2.23745
MEXAM1_RS01315	CsbD family protein	17.3291	23.0292	22.0499	22.6144	26.4405	21.2781	18.0442	15.599	15.9082
MEXAM1_RS01320	hypothetical protein	5.37714	6.07015	5.2305	6.67201	7.18203	6.8747	3.15696	3.57816	3.68925
MEXAM1_RS01325	CsbD family protein	61.9757	36.4767	70.5695	76.0015	68.8403	77.1902	29.5024	24.9789	30.1554
MEXAM1_RS01330	CsbD family protein	22.4489	22.6639	22.1954	24.1421	22.6186	22.4308	14.8994	14.2462	11.8889
MEXAM1_RS01335	membrane protein	7.71596	9.74623	9.18277	7.34486	6.8877	7.0491	5.68502	4.62241	5.53606
MEXAM1_RS01340	acetylornithine deacetylase	6.73176	7.57055	6.32947	5.87717	4.27952	5.69639	7.97698	8.86908	7.00795
MEXAM1_RS01345	Co2+/Mg2+ efflux protein ApaG	112.717	126.628	87.8121	112.925	78.6672	80.3169	89.6365	95.7282	85.7878
MEXAM1_RS01350	hypothetical protein	6.05821	7.88361	6.81059	8.32049	6.98218	9.42819	8.20892	12.732	11.4996
MEXAM1_RS01355	2'-deoxycytidine 5'-triphosphate deaminase	3.87966	3.8978	3.75299	4.22832	3.53426	2.8798	5.37588	4.96009	5.53324
MEXAM1_RS01360	formate/nitrite transporter family protein	6.37747	7.0398	5.42662	5.9024	5.98799	6.22262	7.07278	6.17658	7.28041
MEXAM1_RS01365	competence/damage-inducible protein A	11.1946	12.3567	12.7154	10.5692	11.8058	11.8573	9.1937	7.24565	7.84223
MEXAM1_RS01370	DNA/RNA nuclease SfsA	0.838278	1.66526	2.04691	1.21546	1.33778	1.9706	2.47381	1.55739	1.73401
MEXAM1_RS01375	FkbM family methyltransferase	6.61256	5.579	5.74037	4.56903	5.01009	4.64368	5.89506	6.74202	6.80817
MEXAM1_RS01380	alpha/beta hydrolase	11.416	12.8618	11.9713	11.6405	11.4454	12.1707	18.4681	15.4234	16.5411
MEXAM1_RS01385	hypothetical protein	3.46607	3.11811	3.28914	4.08841	5.28781	3.474	6.8521	5.88942	5.50531
MEXAM1_RS01390	ABC transporter permease	7.15987	5.42783	5.85588	5.52431	5.35585	5.54693	6.01651	5.1322	6.6307
MEXAM1_RS01395	ABC transporter ATP-binding protein	4.16505	5.52817	5.26541	4.73878	3.87306	4.54816	4.75248	4.92516	5.18187
MEXAM1_RS01400	4Fe-4S dicluster domain-containing protein	8.36219	8.33326	7.70551	8.44017	9.21807	8.48361	13.639	14.7058	13.8377
MEXAM1_RS01405	hypothetical protein	13.9134	11.7687	11.5933	11.8687	13.1525	13.2093	10.7048	9.71108	11.9172
MEXAM1_RS01410	hypothetical protein	3.22168	4.35443	3.52082	6.29319	4.03253	5.8674	1.57819	2.92292	2.84066
MEXAM1_RS01415	hypothetical protein	11.9002	9.78298	10.3087	11.305	8.7667	10.856	5.92445	5.28673	6.9552
MEXAM1_RS01420	DUF3305 domain-containing protein	17.9707	18.0365	12.6187	13.7856	16.5023	15.4309	10.8062	9.9189	10.4538
MEXAM1_RS01425	DUF3306 domain-containing protein	6.7305	5.81404	8.05172	10.1789	8.45479	6.17606	4.0387	3.66005	5.08824
MEXAM1_RS01430	molecular chaperone TorD	16.934	14.4019	14.0814	16.3595	23.8187	21.5107	12.5068	14.8815	17.3683
MEXAM1_RS01435	Formate dehydrogenase, possibly related to Fdh3 biosynthesis	216.236	170.75	198.476	265.057	215.914	235.104	94.9695	72.3516	67.7633
MEXAM1_RS01440	formate dehydrogenase	14.6659	16.6194	16.7736	16.9574	17.702	15.8018	8.78551	8.68676	9.36834
MEXAM1_RS01445	4Fe-4S dicluster domain-containing protein, Cytochrome-linked formate DH, Fdh3B	24.8659	24.4337	29.9899	27.2872	24.6771	24.9173	11.1411	12.0086	12.1651
MEXAM1_RS01450	formate dehydrogenase subunit gamma	25.7963	28.6923	28.0591	30.6889	29.1869	27.3206	16.4887	16.0217	15.786
MEXAM1_RS01455	hypothetical protein	126.008	148.592	136.378	134.737	133.861	134.244	84.2936	85.8131	76.1693
MEXAM1_RS01460	hypothetical protein	51.0349	50.3592	51.0607	47.5607	39.2522	47.0266	22.5375	24.0647	24.4289
MEXAM1_RS01465	YgjV family protein	2.1578	4.24148	4.27924	4.0477	2.6942	3.60867	3.10046	2.88066	1.60951
MEXAM1_RS01470	hypothetical protein	80.7016	62.9776	71.7095	88.5062	75.9471	90.0981	81.2728	82.293	74.1321
MEXAM1_RS01475	TetR/AcrR family transcriptional regulator	3.84317	5.31135	3.29005	4.21016	4.92406	4.25612	4.91647	4.93116	4.74495
MEXAM1_RS01480	efflux RND transporter periplasmic adaptor subunit	7.39956	8.61477	8.01601	7.50302	8.66586	8.5646	9.61432	10.3693	8.68499
MEXAM1_RS01485	AcrB/AcrD/AcrF family protein	4.55	4.06627	4.51964	4.40002	3.7052	3.95506	4.82969	4.89571	4.31772
MEXAM1_RS01490	hypothetical protein	18.6234	16.6552	12.4998	13.9428	12.4689	13.1155	13.8432	16.2615	12.5885
MEXAM1_RS01495	heat-inducible transcriptional repressor HrcA	12.7635	12.5908	10.9192	12.7986	11.8303	12.6623	14.8213	14.7197	14.1577
MEXAM1_RS01500	hypothetical protein	1419.77	1392.72	1413.38	1409.28	1277.44	1147.03	537.285	588.65	557.664
MEXAM1_RS01505	ribonuclease PH	9.48118	11.213	10.1916	11.5151	9.83262	8.43769	7.66655	8.28892	11.2995
MEXAM1_RS01510	non-canonical purine NTP pyrophosphatase, RdgB/HAM1 family	5.16426	5.00493	4.21127	3.84929	3.54991	5.63648	4.74396	3.96254	4.47637
MEXAM1_RS01515	radical SAM protein	5.36797	5.08725	4.60837	5.90829	5.55989	5.77432	6.95278	6.523	6.39387
MEXAM1_RS01520	penicillin-binding protein activator	4.75136	5.4448	5.13942	4.88381	4.95347	4.18286	7.95283	6.39845	7.63667
MEXAM1_RS01525	16S rRNA (cytidine(1402)-2'-O)-methyltransferase	7.25259	6.40645	5.52159	6.83203	6.40471	6.55828	8.56293	9.7899	9.22192
MEXAM1_RS01530	YraN family protein	4.06263	6.54572	8.33784	4.66333	7.18325	5.34005	8.7554	8.4131	4.30401
MEXAM1_RS01535	response regulator	69.8389	68.1003	70.389	72.2978	68.1582	67.3333	91.7373	106.813	100.855
MEXAM1_RS01540	ABC transporter substrate-binding protein	4.12015	4.40384	4.46131	3.01996	3.6917	3.63955	3.60796	3.93094	3.58532
MEXAM1_RS01545	ABC transporter permease	1.24112	1.85238	1.2555	1.61468	1.2463	0.850845	0.667768	0.816407	0.999852
MEXAM1_RS01550	ABC transporter permease	3.67316	5.10152	5.62706	6.98419	4.90265	5.9461	2.845	4.71345	2.8796
MEXAM1_RS01555	murein L,D-transpeptidase	35.015	33.4784	34.3665	38.9394	38.0393	31.7998	16.6824	16.0803	16.7344
MEXAM1_RS01560	extensin	2.35291	2.06417	2.59183	1.53124	1.46351	2.07073	2.7312	2.19702	3.14098
MEXAM1_RS01565	M3 family peptidase	14.8788	14.3002	12.6041	13.686	12.4031	12.2798	15.4413	15.7676	14.8322
MEXAM1_RS01570	formate--tetrahydrofolate ligase	36.9924	36.7738	34.9234	27.8094	27.5035	29.7145	54.5237	47.1128	41.8872
MEXAM1_RS01575	copper chaperone	366.448	344	350.24	330.541	371.026	377.447	212.325	153.681	182.52
MEXAM1_RS01580	diguanylate phosphodiesterase	5.89436	7.08065	6.26536	7.11746	6.05808	6.00851	7.51278	6.38386	7.36716
MEXAM1_RS01585	hypothetical protein	54.3432	39.9282	49.7469	27.928	48.0493	24.4378	86.3378	65.2524	99.1383
MEXAM1_RS01590	chemotaxis protein	8.90229	13.3311	10.9517	11.9562	20.5475	10.7835	54.3289	47.8624	52.0842
MEXAM1_RS01595	response regulator	25.5572	33.1241	42.5412	23.122	55.113	35.2484	187.981	165.31	195.651
MEXAM1_RS01600	bifunctional riboflavin kinase/FAD synthetase	2.66096	3.14506	2.73379	3.2869	3.8423	2.6888	3.68818	4.04704	3.77876
MEXAM1_RS01605	D-glycerate dehydrogenase	20.7467	21.8086	21.5231	21.4344	21.0884	19.991	19.7155	19.6891	17.9822
MEXAM1_RS01610	hypothetical protein	14.0257	13.4123	16.3792	13.8971	15.3954	12.5015	29.6482	27.118	26.3557
MEXAM1_RS01615	transcriptional repressor	263.666	283.003	270.863	258.428	225.366	224.538	251.131	267.487	241.027
MEXAM1_RS01620	bifunctional 3-hydroxydecanoyl-ACP dehydratase/trans-2-decenoyl-ACP isomerase	66.6309	69.6389	59.266	58.5257	55.2477	53.9784	53.9906	52.2136	49.2656
MEXAM1_RS01625	beta-ketoacyl-[acyl-carrier-protein] synthase I	63.8882	72.5971	72.4668	59.9448	60.5849	56.9784	55.0155	56.9234	58.7459
MEXAM1_RS01630	enoyl-[acyl-carrier-protein] reductase FabI	12.6587	11.4614	10.863	10.4806	10.2376	11.7389	17.6557	17.2321	13.6887
MEXAM1_RS01635	flagellar biosynthetic protein FliP	3.07366	2.61703	3.47757	2.54138	2.7711	2.43519	3.95816	4.07102	3.16363
MEXAM1_RS01640	DoxX family protein	22.9569	20.9004	22.0342	21.4294	16.7309	22.2461	22.8831	24.8214	24.9696
MEXAM1_RS01645	hypothetical protein	2.3478	2.17054	2.25519	2.07171	2.47869	2.08272	3.20688	2.45631	3.28894
MEXAM1_RS01650	hypothetical protein	40.9609	41.5286	34.2975	32.9674	32.9671	31.4563	20.0717	19.5502	23.3429
MEXAM1_RS01655	S9 family peptidase	8.44247	8.91227	9.50483	8.12967	8.41058	8.29997	9.29909	9.48665	8.08013
MEXAM1_RS01660	transcriptional regulator	144.256	170.533	158.926	176.139	161.641	175.262	200.174	204.368	179.82
MEXAM1_RS01665	hypothetical protein	219.88	193.553	203.978	324.154	287.455	221.931	148.095	132.869	133.216
MEXAM1_RS01670	hypothetical protein	7.64363	6.64446	6.52369	7.13337	7.93584	8.3454	4.47801	3.78096	4.17966
MEXAM1_RS01675	cysteine desulfuration protein SufE	58.0363	49.6871	52.851	47.6782	51.9496	45.8746	39.8824	44.1733	45.5373
MEXAM1_RS01680	PAS domain S-box protein	59.4914	57.1831	54.6975	61.1899	46.8587	45.1622	22.1987	24.3106	24.0061
MEXAM1_RS01685	hypothetical protein	0.588102	0.563735	0.728472	0.813009	1.20048	1.20548	0.738555	1.00916	0.711176
MEXAM1_RS01690	Tn3 family transposase ISMex22	3.28527	2.59931	2.61447	3.10455	2.90147	3.47811	2.669	2.74988	2.94229
MEXAM1_RS01695	recombinase family protein	3.70402	2.75887	3.31568	4.7522	3.92356	3.73253	4.05119	4.11901	4.0065
MEXAM1_RS01700	histidine kinase	1.56299	1.93881	1.60716	1.63495	1.51488	1.84624	1.45425	1.34803	1.63097
MEXAM1_RS01705	hypothetical protein	214.774	202.83	189.329	183.242	151.533	153.606	207.231	243.5	198.642
MEXAM1_RS01710	lactoylglutathione lyase	151.257	160.704	163.07	142.942	121.588	132.722	111.581	139.461	116.73
MEXAM1_RS01715	hypothetical protein	4.7002	3.82608	4.48156	3.10424	3.84323	3.72371	6.29248	5.01258	4.69794
MEXAM1_RS01720	aminopeptidase N	3.30458	4.05295	4.31862	3.4926	3.46323	3.94314	4.49102	4.13557	3.32538
MEXAM1_RS01725	PAS domain-containing sensor histidine kinase	2.83884	3.4126	3.31177	2.95458	3.70194	3.33344	6.57663	6.614	6.34321
MEXAM1_RS01730	arginase	2.79946	2.79318	2.93359	2.12902	3.41354	2.63661	3.42962	3.34911	3.45458
MEXAM1_RS01735	glucose-6-phosphate dehydrogenase	8.55997	9.64378	11.4934	8.02607	10.2661	11.2523	9.20921	10.9706	10.5484
MEXAM1_RS01740	PilZ domain-containing protein	5.50892	4.66076	5.71768	4.78305	6.66693	7.34773	8.58168	11.1371	11.1559
MEXAM1_RS01745	divalent-cation tolerance protein CutA	63.0295	60.5688	58.5326	52.8024	48.7356	61.5834	27.8692	36.9501	38.3791
MEXAM1_RS01750	NAD kinase	9.41617	12.4806	11.5227	11.1499	12.1718	11.7968	9.62802	10.5118	11.442
MEXAM1_RS01755	DUF1674 domain-containing protein	907.229	794.821	747.808	826.08	1004.67	806.449	745.454	715.637	758.624
MEXAM1_RS01760	methyltransferase domain-containing protein	6.9952	8.19356	7.95647	6.71786	8.8731	8.30562	6.97694	6.01031	8.30789
MEXAM1_RS01765	hypothetical protein	3.47231	1.90676	3.05024	2.78439	2.21008	2.27589	5.06694	4.61363	5.16549
MEXAM1_RS01770	aminotransferase	6.065	4.38056	5.34518	5.22321	6.60412	6.5828	12.0698	8.59169	13.5656
MEXAM1_RS01775	hypothetical protein	102.554	113.451	98.1406	122.89	105.443	114.437	51.8961	47.6382	44.3597
MEXAM1_RS01780	[acyl-carrier-protein] S-malonyltransferase	7.17379	8.70961	9.69297	9.46252	7.5484	9.86634	5.97313	7.80927	6.49561
MEXAM1_RS01785	3-oxoacyl-[acyl-carrier-protein] reductase	9.90008	11.1573	13.156	11.0725	13.2688	13.508	12.5889	12.5482	13.692
MEXAM1_RS01790	acyl carrier protein	1484.13	1400.73	1412.17	1236.15	1142.97	1169.39	1245.02	1270.75	1349.15
MEXAM1_RS01795	beta-ketoacyl-[acyl-carrier-protein] synthase II	23.1499	25.036	24.9092	23.788	21.1957	20.3073	28.1449	32.5085	27.5454
MEXAM1_RS01800	endolytic transglycosylase MltG	32.4715	27.1617	29.3825	22.6985	22.0156	23.3801	38.0047	39.4856	35.9985
MEXAM1_RS01805	haloacid dehalogenase	15.089	14.5116	18.2175	16.6425	17.7478	15.3169	10.4301	10.9018	10.1266
MEXAM1_RS01810	glycoside hydrolase family 65 protein	13.1954	13.165	11.9104	16.6764	13.7021	13.6269	4.42173	4.85904	4.51701
MEXAM1_RS01815	acetate/propionate family kinase	83.2338	75.4186	75.8923	71.2637	62.7571	62.6759	40.28	37.6137	41.1753
MEXAM1_RS01820	hemolysin secretion protein D	87.9101	83.1616	80.2612	83.6139	71.6179	74.0201	56.3749	56.8554	56.644
MEXAM1_RS01825	ABC transporter ATP-binding protein/permease	20.4615	22.1097	21.4076	22.6856	17.3732	18.7699	10.9007	10.4294	10.7014
MEXAM1_RS01830	ABC transporter permease	16.1843	16.7482	16.0954	18.3128	12.3752	13.0358	8.01878	8.29255	8.78157
MEXAM1_RS01835	phosphoketolase	68.5961	68.0346	63.078	57.5976	47.3562	52.288	36.7883	37.2177	32.2863
MEXAM1_RS01840	FAD-binding monooxygenase	23.7986	23.4704	27.7649	23.177	16.775	19.581	11.4321	12.6043	12.4353
MEXAM1_RS01845	tRNA-Gly	12.8338	22.1357	10.0506	10.0994	27.4694	29.8154	27.6321	1.83174	16.1471
MEXAM1_RS01850	ABC transporter ATP-binding protein	2.85505	2.77521	2.01531	2.47195	2.2549	2.31917	2.49896	2.66789	2.71807
MEXAM1_RS01855	iron ABC transporter substrate-binding protein	17.8613	17.9691	20.6796	16.0009	17.2539	17.4962	25.6298	26.5966	25.1101
MEXAM1_RS01860	iron ABC transporter permease	24.4616	25.6781	22.3215	21.824	26.8964	23.2965	17.0482	14.2846	15.9313
MEXAM1_RS01865	hypothetical protein	648.612	670.091	623.815	564.743	972.693	863.23	955.809	729.319	889.24
MEXAM1_RS01870	cysteine biosynthesis protein	4.76646	7.78339	7.69227	5.95437	5.21248	7.38555	7.19256	6.30205	3.83973
MEXAM1_RS01875	hypothetical protein	13.1674	13.6446	14.4404	14.742	11.6115	12.9681	6.15965	6.32457	5.18605
MEXAM1_RS01880	FAD-dependent oxidoreductase	3.76431	3.57663	4.01621	4.26854	3.84058	2.90199	1.9637	2.08154	2.32144
MEXAM1_RS01885	cyclic nucleotide-binding protein	3.00248	4.08565	2.36884	5.29277	4.46601	2.87576	4.22644	4.8431	4.29731
MEXAM1_RS01890	cupin domain-containing protein	22.4685	22.4389	19.7943	12.4642	19.3837	16.1544	27.0018	32.7764	30.3288
MEXAM1_RS01895	hypothetical protein	171.345	167.793	185.007	169.678	197.695	138.942	270.439	293.503	285.821
MEXAM1_RS01900	hypothetical protein	4.92883	5.48733	6.07746	8.81851	8.30371	8.30356	12.8978	15.462	10.4588
MEXAM1_RS01905	sulfate ABC transporter substrate-binding protein	7.84941	7.89687	5.91729	8.35777	7.88741	6.06216	8.83203	7.22385	8.48402
MEXAM1_RS01910	sulfate ABC transporter permease subunit CysT	4.66297	4.36338	4.62777	4.14918	5.87165	5.45404	5.1567	3.86966	3.41348
MEXAM1_RS01915	sulfate ABC transporter permease subunit CysW	5.94716	5.18859	5.61427	5.90943	7.07617	5.60239	3.81036	3.78212	4.58334
MEXAM1_RS01920	sulfate ABC transporter ATP-binding protein	26.0662	26.6894	27.3343	34.3231	31.2088	26.8903	13.4415	11.6724	12.8964
MEXAM1_RS01930	IS3 family transposase	13.3737	11.4706	11.9703	12.7556	11.0748	11.7578	9.66975	10.11	10.0734
MEXAM1_RS01935	tRNA-Met	15.7223	22.5974	13.6074	32.7888	28.1622	25.8784	37.5625	18.0724	36.391
MEXAM1_RS01940	5S ribosomal RNA	158.749	138.404	120.664	184.799	123.843	158.957	161.949	194.343	256.801
MEXAM1_RS01945	23S ribosomal RNA	23.7904	27.9146	45.4963	36.872	30.957	49.0992	15.3445	20.7297	13.0807
MEXAM1_RS01950	tRNA-Ala	23.4344	27.5977	13.7896	29.0434	18.1489	21.0397	20.0231	10.9245	20.4562
MEXAM1_RS01955	tRNA-Ile	18.0151	25.2048	16.409	27.5616	14.8858	24.5164	14.7787	15.5389	17.507
MEXAM1_RS01960	16S ribosomal RNA	9.89011	11.1701	22.0552	16.7523	13.8957	26.9124	7.07267	9.00185	5.8732
MEXAM1_RS01965	DUF2244 domain-containing protein	32.6363	41.0411	42.4714	36.3013	29.8995	36.2115	32.9164	36.027	34.0727
MEXAM1_RS01970	endonuclease III	2.97156	3.40091	3.3745	4.00841	4.60458	3.83775	3.82534	3.21274	4.19821
MEXAM1_RS01975	phosphoribosylaminoimidazolesuccinocarboxamide synthase	265.483	267.888	259.371	260.271	248.602	257.193	276.65	283.734	269.564
MEXAM1_RS01980	glycosyl transferase	1.80445	1.87624	2.10405	2.18437	1.77659	1.78333	1.88235	1.84901	1.70676
MEXAM1_RS01985	glycosyl transferase	1.07288	0.959675	0.565338	1.10875	0.840841	1.14185	1.33723	0.854587	1.19573
MEXAM1_RS01990	hypothetical protein	23.2626	21.1871	23.2103	20.2885	17.396	20.5745	29.9949	31.2831	33.043
MEXAM1_RS01995	invasion associated locus B family protein	18.0714	15.8849	14.8822	17.0938	17.1286	19.1705	19.4814	23.883	25.9153
MEXAM1_RS02000	hypothetical protein	101.382	127.462	124.674	112.178	119.107	112.055	140.528	149.595	141.193
MEXAM1_RS02005	M48 family peptidase	17.5095	22.0253	18.2692	18.9368	20.1053	18.2302	21.9967	22.0926	22.2415
MEXAM1_RS02010	polyhydroxyalkanoate depolymerase	10.5322	9.65742	10.5022	9.81805	10.0724	11.1006	11.4157	11.6671	11.2459
MEXAM1_RS02015	sensor histidine kinase	5.2799	5.8121	6.63511	5.76997	6.1114	4.92364	3.12216	3.40077	3.08596
MEXAM1_RS02020	DNA-binding response regulator	588.402	600.551	606.636	595.539	607.208	554.811	428.083	467.907	453.243
MEXAM1_RS02025	hypothetical protein	160.666	142.904	172.413	150.344	143.752	148.651	151.028	148.895	160.684
MEXAM1_RS02030	phosphoribosylformylglycinamidine synthase subunit PurS	127.363	116.192	129.2	96.0501	154.455	140.636	190.371	159.79	188.47
MEXAM1_RS02035	phosphoribosylformylglycinamidine synthase subunit PurQ	19.3485	22.7733	22.4081	19.3981	20.0246	19.9079	26.4717	30.1442	26.9093
MEXAM1_RS02040	adenine phosphoribosyltransferase	22.9075	26.65	28.7798	25.2252	23.2054	26.003	20.8603	23.161	19.5587
MEXAM1_RS02045	inositol monophosphatase	22.074	23.7159	22.5946	26.0953	22.7112	23.6265	16.4528	15.7596	17.5074
MEXAM1_RS02050	thiamine phosphate synthase	34.2753	35.0372	35.7425	37.3421	32.05	34.4862	7.78403	7.12684	8.92596
MEXAM1_RS02055	thiazole synthase	71.7347	83.2157	80.1691	80.286	88.4548	78.1567	28.2086	25.5352	25.9453
MEXAM1_RS02060	thiamine biosynthesis protein ThiS	136.413	169.83	163.582	186.862	222.763	180.688	58.2245	44.0723	56.2476
MEXAM1_RS02065	glycine oxidase ThiO	55.9524	59.6721	58.5724	63.031	70.6953	67.7528	29.3214	30.5961	28.5119
MEXAM1_RS02070	adenylate/guanylate cyclase domain-containing protein	10.9437	10.4887	8.90234	9.34945	11.5174	9.07541	15.377	13.9	15.4021
MEXAM1_RS02075	hypothetical protein	8.8631	11.9785	9.8723	9.08547	12.7474	16.3906	23.2885	22.3185	22.2215
MEXAM1_RS02080	AraC family transcriptional regulator	2.20319	2.08694	2.02411	1.66301	1.47265	2.77981	1.7564	1.5857	1.63888
MEXAM1_RS02085	MFS transporter	0.46535	0.866268	0.794424	0.852856	1.02111	0.656046	0.364131	0.272421	0.283045
MEXAM1_RS02090	RNA polymerase sigma factor RpoD	40.4225	44.5627	41.6668	45.6902	42.4938	38.6099	32.0467	31.3669	35.0632
MEXAM1_RS02095	DNA primase	3.85199	3.89939	3.77454	4.60952	4.81978	4.1429	5.36686	5.70256	6.21508
MEXAM1_RS02100	SMP-30/gluconolactonase/LRE family protein	7.58671	7.69667	7.04959	9.40117	7.17993	6.42157	2.38433	3.34096	3.73143
MEXAM1_RS02105	hypothetical protein	8.96332	8.418	9.11477	10.2971	6.79756	8.04309	4.26259	4.3344	4.04403
MEXAM1_RS02110	GatB/YqeY domain-containing protein	46.5846	51.6904	49.7641	38.2849	45.5758	42.6435	50.0016	40.8113	39.8274
MEXAM1_RS02115	carbamoyl-phosphate synthase small subunit	26.9793	31.9458	30.1468	29.8819	38.4917	33.8624	36.8201	34.2594	37.6837
MEXAM1_RS02120	hypothetical protein	18.0591	16.0969	17.3306	10.8691	17.2944	13.6406	59.6483	60.4253	57.6527
MEXAM1_RS02125	hypothetical protein	1.82386	1.34676	1.47262	1.66931	1.34413	1.73714	2.23411	2.07835	1.84879
MEXAM1_RS02130	flagellar biosynthesis protein FlgB	8.28883	5.30149	6.04269	5.22311	8.26756	8.00751	6.90797	7.97694	8.1863
MEXAM1_RS02135	flagellar basal body rod protein FlgC	1.95199	0.941705	3.90758	1.3785	1.81559	2.86898	0.601804	1.92644	2.50262
MEXAM1_RS02140	flagellar hook-basal body protein FliE	3.90595	1.45811	1.85075	2.55471	3.18316	2.40027	7.50219	5.81212	5.85557
MEXAM1_RS02145	flagellar basal-body rod protein FlgG	1.717	1.16977	1.51042	1.20717	2.05751	1.98372	3.32741	3.98517	3.89868
MEXAM1_RS02150	flagella basal body P-ring formation protein FlgA	1.13924	0.321977	1.03289	1.51266	0.895172	1.0794	2.86681	1.99204	1.98646
MEXAM1_RS02155	flagellar basal body P-ring protein FlgI	0.631194	0.80745	0.406285	0.688676	0.557689	0.610806	1.50938	0.679604	0.704089
MEXAM1_RS02160	MgtE intracellular region	0.415543	1.29493	1.21199	1.9395	0.790155	2.11669	1.99031	0.919276	1.23998
MEXAM1_RS02165	flagellar basal body L-ring protein FlgH	0.910054	0.860587	0.555083	1.21728	1.1604	1.0684	1.88749	2.21096	2.4103
MEXAM1_RS02170	flagellar basal body protein FliL	1.19848	1.01556	1.30247	0.993696	1.50439	1.13367	2.87222	2.85244	1.7914
MEXAM1_RS02175	flagellar biosynthetic protein FliP	1.2155	1.9223	1.62282	1.30792	2.57977	1.92223	2.86658	1.76378	1.74523
MEXAM1_RS02180	hypothetical protein	25.0459	10.9557	14.083	7.19818	16.8671	21.0328	10.274	12.6095	19.1394
MEXAM1_RS02185	flagellar M-ring protein FliF	0.838669	0.798468	0.499363	0.748454	0.748659	0.845434	1.94322	1.61054	1.94172
MEXAM1_RS02190	hypothetical protein	1.75095	0.993625	1.28205	1.46419	1.58236	1.77627	2.09492	2.05348	2.31833
MEXAM1_RS02195	membrane protein	1.63531	1.36137	1.23396	1.44765	1.42539	1.43089	2.14561	2.02469	1.95683
MEXAM1_RS02200	chemotaxis protein MotC	0.610988	0.834135	0.54002	1.02659	1.37678	1.18466	1.08099	1.22346	1.15061
MEXAM1_RS02205	flagellar hook-length control protein FliK	0.949388	0.957861	0.986553	0.696765	0.751617	1.11769	0.969683	0.696943	1.09027
MEXAM1_RS02210	lytic transglycosylase	0.55295	1.12899	0.849058	1.10846	1.16157	1.06073	1.74691	1.53591	2.38972
MEXAM1_RS02215	DNA-binding response regulator	8.91467	9.94113	11.8108	10.4835	10.2868	12.8909	32.8832	29.5871	30.3798
MEXAM1_RS02220	hypothetical protein	36.9047	27.0085	21.7609	18.7682	23.248	19.1328	57.3208	61.8231	53.415
MEXAM1_RS02225	flagellar biosynthesis protein FlhB	0.853339	0.776125	0.941194	0.859127	1.04111	1.26536	1.63258	1.43114	1.43861
MEXAM1_RS02230	flagellar motor switch protein FliG	0.667817	0.427094	0.491111	0.560347	0.589754	0.484458	0.55896	1.59938	0.745016
MEXAM1_RS02235	flagellar motor switch protein FliN	0.551946	2.31754	1.17328	2.16007	2.0176	2.53606	4.78033	8.74255	9.52919
MEXAM1_RS02240	PepSY domain-containing protein	139.174	122.637	137.318	128.015	214.401	160.507	92.0313	80.2602	140.799
MEXAM1_RS02245	hypothetical protein	26.1176	28.77	22.88	17.4814	19.1088	28.767	25.1244	15.3132	18.4244
MEXAM1_RS02250	flagellar motor switch protein FliM	4.35511	3.71316	5.2568	6.04272	7.19693	5.97421	4.05355	3.3015	4.50886
MEXAM1_RS02255	flagellar motor stator protein MotA	2.06826	2.01401	1.95187	2.30217	3.33476	2.99242	3.81658	3.14913	2.85843
MEXAM1_RS02260	ATP-dependent protease subunit HslV	33.589	35.0005	36.2089	32.2198	37.4059	35.3044	42.6914	47.1678	46.3393
MEXAM1_RS02265	HslU--HslV peptidase ATPase subunit	27.8939	29.8309	26.0175	26.1906	30.7371	27.5776	31.0857	30.6458	33.1215
MEXAM1_RS02270	EamA family transporter	3.02949	4.11804	4.44814	2.61103	3.67313	4.59308	4.96906	4.47994	3.64989
MEXAM1_RS02275	membrane protein	9.44362	9.26499	8.84723	8.82037	9.37003	8.19731	12.1627	11.6536	13.963
MEXAM1_RS02280	aromatic ring-hydroxylating dioxygenase subunit alpha	3.03879	3.86335	3.71792	2.67039	2.50188	3.90144	3.48814	4.92176	3.78039
MEXAM1_RS02285	hypothetical protein	19.3604	21.1789	21.8704	21.4575	24.9442	23.5197	72.0618	56.2532	57.9823
MEXAM1_RS02290	hypothetical protein	66.9166	53.4242	89.2438	47.6594	76.6583	54.3524	66.7621	102.454	96.2991
MEXAM1_RS02295	signal recognition particle protein	14.0899	14.2144	14.1774	13.6439	11.7854	12.2054	13.331	12.8935	11.5428
MEXAM1_RS02300	chorismate mutase	13.7032	13.8059	15.0955	9.84443	12.9768	7.99313	11.5171	13.3402	8.91306
MEXAM1_RS02305	30S ribosomal protein S16	220.417	221.715	266.941	191.006	186	193.739	139.117	154.476	142.021
MEXAM1_RS02310	ribosome maturation factor RimM	4.28215	4.3904	5.05831	4.40239	5.13791	4.7397	5.91271	6.49934	5.15419
MEXAM1_RS02315	DUF4239 domain-containing protein	2.1225	1.80761	1.77396	1.96141	2.84908	3.02484	3.96085	3.50897	4.80348
MEXAM1_RS02320	SAM-dependent methyltransferase	8.9333	10.8754	9.07412	11.2788	10.94	9.04881	5.17164	5.5218	5.72304
MEXAM1_RS02325	hypothetical protein	66.8638	54.0233	65.133	75.8956	77.0235	69.7368	19.0801	21.5096	10.4153
MEXAM1_RS02330	tRNA (guanosine(37)-N1)-methyltransferase TrmD	7.14636	7.91616	6.77324	9.62657	8.24247	8.09048	3.09218	4.20524	3.35393
MEXAM1_RS02335	phosphoserine transaminase	108.556	134.441	142.165	86.299	119.73	107.362	271.039	263.855	218.73
MEXAM1_RS02340	phosphoglycerate dehydrogenase	13.1464	15.9757	15.2481	9.25166	14.1221	12.7253	28.6267	29.6733	23.429
MEXAM1_RS02345	DUF1902 domain-containing protein	275.245	283.059	329.96	210.33	250.649	252.155	390.907	373.435	333.021
MEXAM1_RS02350	S-methyl-5-thioribose-1-phosphate isomerase	18.2462	17.464	19.9496	14.9183	15.9547	13.6999	22.1554	20.772	19.5648
MEXAM1_RS02355	DUF3140 domain-containing protein	116.477	108.146	95.9298	114.106	83.3028	100.125	30.2736	34.6125	29.8245
MEXAM1_RS02360	MATE family efflux transporter	3.94752	4.379	3.5767	4.33822	5.18571	4.09566	1.72713	1.43921	1.49651
MEXAM1_RS02365	ABC transporter ATP-binding protein	13.8322	14.3321	11.3648	13.4662	15.1339	13.6299	7.32652	6.66564	7.46357
MEXAM1_RS02370	tRNA (cytidine(34)-2'-O)-methyltransferase	1.39805	1.57672	2.2702	3.00462	2.18193	2.1926	1.34023	3.35984	2.78778
MEXAM1_RS02375	methyl-accepting chemotaxis protein	1.72016	2.12089	2.28969	2.12106	1.69442	2.1647	2.99273	3.3396	3.43258
MEXAM1_RS02380	PspA/IM30 family protein	1.60853	1.15058	1.31698	2.14273	1.65063	1.30566	1.71229	1.89908	2.04506
MEXAM1_RS02385	DUF1449 domain-containing protein	1.65885	1.88166	1.9407	2.32776	1.79516	1.90931	2.38216	1.53591	1.73049
MEXAM1_RS02390	flotillin	1.55443	2.19337	1.96453	1.44021	2.11698	2.125	1.95657	1.76464	1.81527
MEXAM1_RS02395	TonB-dependent siderophore receptor	8.35436	6.17847	7.08618	6.15134	5.76237	6.01512	9.96756	8.51717	8.25821
MEXAM1_RS02400	oxygen-dependent coproporphyrinogen oxidase	3.70357	4.6176	3.9288	3.58713	2.90115	4.96551	5.16745	4.89816	5.4092
MEXAM1_RS02405	ATP-binding protein	3.01887	3.25204	4.38294	4.05377	3.1138	3.17744	4.33145	4.18228	3.34785
MEXAM1_RS02410	aminotransferase	4.40059	6.01438	6.19861	4.25382	6.37035	5.39462	8.50347	9.06768	8.54651
MEXAM1_RS02415	DNA-binding response regulator	3.54722	2.74377	2.59462	4.52623	4.10761	4.43543	4.3219	3.45402	4.48488
MEXAM1_RS02420	flagellin	4.82157	5.56616	5.77469	6.00458	10.3695	6.20648	23.8306	22.0783	26.8964
MEXAM1_RS02425	PilZ domain-containing protein	20.9798	16.3884	14.5286	19.0672	23.1563	27.8794	35.7723	37.1083	40.5117
MEXAM1_RS02430	hypothetical protein	2.32089	1.84871	2.3782	3.33479	2.0666	2.49135	5.94032	4.5018	5.51913
MEXAM1_RS02435	DUF1217 domain-containing protein	1.97716	1.88278	1.6247	1.43635	2.17397	1.60346	4.81547	4.21589	3.52118
MEXAM1_RS02440	flagellar basal-body rod protein FlgF	1.44993	1.8925	2.01725	1.35804	2.03506	1.76525	4.02463	2.9547	2.95159
MEXAM1_RS02445	flagellum-specific ATP synthase FliI	1.75382	1.78831	1.51198	2.0696	2.06483	1.69974	2.51599	2.69376	2.38505
MEXAM1_RS02450	flagellar hook protein FlgE	2.9756	3.84821	2.96709	3.43318	3.61094	3.53219	8.74467	7.05205	7.85078
MEXAM1_RS02455	flagellar hook-associated protein FlgK	2.24251	1.62176	1.89019	2.37622	1.72595	2.39613	3.24408	2.63442	3.19247
MEXAM1_RS02460	flagellar hook-associated protein FlgL	3.1641	3.58079	2.98204	2.37457	3.04733	3.05958	5.40689	4.83886	5.30582
MEXAM1_RS02465	flagellar biosynthesis regulator FlaF	8.45685	4.48324	6.64239	6.54729	10.1988	8.61248	11.8688	11.5829	8.34628
MEXAM1_RS02470	flagellar biosynthesis repressor FlbT	8.54354	7.10606	5.58835	9.71443	10.0204	6.98249	6.87805	7.51092	7.01872
MEXAM1_RS02475	flagellar basal body rod modification protein FlgD	11.4913	11.6795	11.4124	17.4486	15.3071	16.2245	20.7688	26.1072	19.1726
MEXAM1_RS02480	flagellar biosynthesis protein FliQ	427.989	344.627	330.579	444.884	376.551	398.733	721.938	812.889	720.813
MEXAM1_RS02485	flagellar biosynthesis protein FlhA	0.80537	0.730634	0.612717	0.990797	0.925949	0.880483	1.17311	1.30759	1.12196
MEXAM1_RS02490	NA	0.355327	0.30256	0.683548	0.802792	0.34047	0.42742	0.701379	0.257958	0.198417
MEXAM1_RS02495	NA	0.57831	0.975904	1.55686	0.857011	1.61118	0.810284	0.416036	0.667528	0.432644
MEXAM1_RS02500	flagellar protein FlgJ	1.47477	2.31972	5.03133	3.35066	3.95998	5.17266	7.72531	5.40047	6.29968
MEXAM1_RS02505	hypothetical protein	2.09116	0.875827	2.22081	2.55453	3.81652	2.40007	4.1443	7.02294	3.92491
MEXAM1_RS02510	hypothetical protein	0.709705	0.200063	0.768034	1.87682	1.99268	0.889897	2.89155	2.69578	1.76871
MEXAM1_RS02515	dihydrodipicolinate synthase family protein	6.82035	5.26119	7.51091	4.90901	5.86363	6.85774	10.7674	9.74651	9.4559
MEXAM1_RS02520	hypothetical protein	2.0064	1.60347	2.41898	1.45119	3.5598	2.24149	11.3818	8.39755	10.4014
MEXAM1_RS02525	DUF1491 domain-containing protein	3.85091	2.82815	6.66625	5.6536	5.72877	3.98965	10.0631	13.6966	9.03875
MEXAM1_RS02530	peptidoglycan-binding protein	1.74853	2.89898	2.12372	1.94007	3.61339	3.00946	8.98372	9.09528	10.553
MEXAM1_RS02535	PAS domain S-box protein	0.845362	1.11753	1.14647	1.15593	2.05866	1.56302	5.55382	5.10768	6.20034
MEXAM1_RS02540	hypothetical protein	8.88742	8.75827	14.4352	10.2181	11.4496	12.9604	22.6052	27.2655	32.5767
MEXAM1_RS02545	cytochrome d ubiquinol oxidase subunit II	37.8774	40.7286	40.1673	36.6074	35.5792	32.9659	24.1697	23.5959	22.9798
MEXAM1_RS02550	MFS transporter	4.71095	4.62137	5.25327	5.64862	4.49935	3.92387	4.93382	4.55724	4.09817
MEXAM1_RS02555	MFS transporter	1.47855	1.3019	1.42171	1.24944	1.84034	1.01617	1.23169	1.67498	1.48945
MEXAM1_RS02560	transcriptional regulator	43.6122	48.7438	58.9169	51.0192	49.8945	74.1257	10.232	12.0072	6.52189
MEXAM1_RS02565	penicillin-binding protein 1A	4.37726	3.45741	3.93613	5.31255	4.12172	5.49589	2.82926	2.8042	2.59531
MEXAM1_RS02570	HAMP domain-containing protein	0.764514	0.706965	0.70452	0.57847	0.739384	0.711259	0.890966	0.658833	1.08896
MEXAM1_RS02575	AMP nucleosidase	3.91337	4.80272	4.77819	4.02147	4.46564	3.65129	4.51758	4.73929	6.51005
MEXAM1_RS02580	tRNA (N6-threonylcarbamoyladenosine(37)-N6)-methyltransferase TrmO	7.05659	5.83187	6.10794	5.40946	4.44213	4.80695	5.07294	4.86807	7.02816
MEXAM1_RS02585	GNAT family N-acetyltransferase	0.435038	0.519621	0.864892	0.526168	0.377946	0.590204	0.780126	0.68505	0.840899
MEXAM1_RS02590	hypothetical protein	1.29406	1.39129	1.30326	0.793074	0.921372	1.0339	0.968766	1.77901	1.17168
MEXAM1_RS02595	DUF1810 domain-containing protein	13.3123	16.4384	15.7658	14.7085	12.6613	11.0457	11.9694	13.4896	11.2888
MEXAM1_RS02600	histone deacetylase	1.0051	0.795296	1.34406	0.794105	0.965775	1.24686	1.03037	2.02188	1.01504
MEXAM1_RS02605	ceramide glucosyltransferase	0.493835	0.716065	0.763144	0.497493	0.523865	0.382496	0.354256	0.318707	0.66097
MEXAM1_RS02610	hypothetical protein	7.53527	6.34002	6.44361	7.1696	5.18756	6.06953	8.6164	9.16156	8.8499
MEXAM1_RS02615	hypothetical protein	27.6844	25.5876	27.3924	29.2844	23.9196	21.1207	17.6929	19.1735	20.1131
MEXAM1_RS02620	hypothetical protein	7.39779	8.08612	6.13935	6.97622	5.50292	7.18835	6.71925	5.40554	4.65553
MEXAM1_RS02625	ethanolamine permease	0.532349	0.733756	0.723853	0.743076	0.988629	1.23064	0.851789	0.820047	1.00456
MEXAM1_RS02630	GMP synthase	1.25474	1.77955	1.83613	1.57289	1.19926	1.40536	1.42633	1.60209	1.79163
MEXAM1_RS02635	aldo/keto reductase	1.26502	0.718991	0.996265	0.606307	1.2178	0.815148	0.950837	1.25693	0.80655
MEXAM1_RS02640	AraC family transcriptional regulator	0.977662	0.952181	1.23071	1.26417	1.74517	1.21318	1.95431	1.81428	2.18237
MEXAM1_RS02645	NA	3.60079	0	6.33791	2.56053	0	7.16024	2.69954	0.864718	0.993548
MEXAM1_RS02650	FAD-binding monooxygenase	6.33212	6.53012	5.9476	5.4755	5.15131	5.90379	4.06769	4.36831	3.26756
MEXAM1_RS02655	DedA family protein	1.67731	1.78181	1.83424	1.11819	2.65731	1.4682	2.81188	4.12454	3.12832
MEXAM1_RS02660	disulfide bond formation protein B	1.5209	2.0081	1.28992	1.34862	1.11928	1.44582	2.55079	2.01321	3.02879
MEXAM1_RS02665	chromosome partitioning protein ParB	2.39423	4.17874	3.58805	5.29854	3.48108	3.85859	3.07741	2.40647	3.00664
MEXAM1_RS02670	acyltransferase	1.07949	1.42299	0.920779	2.1256	1.04108	1.90034	1.12637	1.7591	1.78778
MEXAM1_RS02675	EVE domain-containing protein	1.61557	4.54805	2.90466	3.19691	2.75938	3.53011	4.64852	4.94926	5.83897
MEXAM1_RS02680	NAD(P)-dependent glycerol-3-phosphate dehydrogenase	5.47748	6.49732	4.46416	4.55457	4.75772	5.46757	6.32202	7.23805	7.39573
MEXAM1_RS02685	PAS domain S-box protein	2.03233	1.38106	2.07969	1.29035	1.38185	1.56967	3.3742	3.14607	2.93731
MEXAM1_RS02690	tRNA (adenosine(37)-N6)-threonylcarbamoyltransferase complex transferase subunit TsaD	21.4697	26.4909	25.7943	26.4159	23.4767	24.19	26.883	27.6959	24.9272
MEXAM1_RS02695	uroporphyrinogen-III synthase	16.6756	16.5016	14.5593	16.6289	15.0841	14.8611	8.87073	8.56451	9.27855
MEXAM1_RS02700	hypothetical protein	50.0345	55.1789	55.4331	57.1595	58.4269	52.3789	29.0366	28.8451	30.4195
MEXAM1_RS02705	heme biosynthesis protein HemY	49.1144	56.5213	55.3999	61.148	61.0957	60.2851	22.4115	20.1872	22.3185
MEXAM1_RS02710	tRNA-Ser	98.6986	107.879	92.974	103.952	108.885	121.552	82.3674	37.7575	43.3732
MEXAM1_RS02715	hypothetical protein	2.3658	2.31868	4.62824	3.486	9.77824	7.28638	2.55275	2.78066	2.95202
MEXAM1_RS02720	NA	0.352742	1.187	0.377625	1.76917	0.660909	2.04548	0	1.0998	0.81262
MEXAM1_RS02725	IS256 family transposase	2.98373	3.20813	3.39494	3.56506	3.34035	3.45914	1.33084	1.48503	1.48502
MEXAM1_RS02730	hypothetical protein	1.19748	0.577236	1.14906	1.46827	1.45543	1.56198	1.53135	1.19569	1.23895
MEXAM1_RS02735	DUF2924 domain-containing protein	2.08861	3.21977	3.51184	2.64715	2.68551	4.31758	1.77469	1.42288	0.851341
MEXAM1_RS02740	IS256 family transposase	2.98373	3.20813	3.39494	3.56506	3.34035	3.45914	1.33084	1.48503	1.48502
MEXAM1_RS02745	hypothetical protein	1885.77	1837.18	1846.79	2290.87	2019.72	1902.1	693.754	736.49	678.357
MEXAM1_RS02750	hypothetical protein	324.124	345.713	264.447	382.943	338.748	274.829	135.617	148.162	155.242
MEXAM1_RS02755	methyl-accepting chemotaxis protein	6.99076	6.19809	7.05039	9.55227	8.48408	7.47094	9.46722	8.23294	9.86927
MEXAM1_RS02760	hypothetical protein	5.43263	3.63761	2.40741	5.44294	5.84488	4.76331	5.64399	2.96176	3.01499
MEXAM1_RS02765	helicase	4.59835	3.61477	5.25055	3.80694	4.14639	3.75981	4.04764	4.06818	4.24794
MEXAM1_RS02770	tRNA-Met	15.7223	22.5974	13.6074	32.7888	28.1622	25.8784	37.5625	18.0724	36.391
MEXAM1_RS02775	5S ribosomal RNA	158.749	138.404	120.664	184.799	123.843	158.957	161.949	194.343	256.801
MEXAM1_RS02780	23S ribosomal RNA	23.7904	27.9146	45.4963	36.872	30.957	49.0992	15.3445	20.7297	13.0807
MEXAM1_RS02785	tRNA-Ala	23.4344	27.5977	13.7896	29.0434	18.1489	21.0397	20.0231	10.9245	20.4562
MEXAM1_RS02790	tRNA-Ile	18.0151	25.2048	16.409	27.5616	14.8858	24.5164	14.7787	15.5389	17.507
MEXAM1_RS02795	16S ribosomal RNA	9.89011	11.1701	22.0552	16.7523	13.8957	26.9124	7.07267	9.00185	5.8732
MEXAM1_RS02805	RNA-binding transcriptional accessory protein	0.937166	1.35286	1.08678	0.901165	1.31843	1.51855	2.25604	2.25308	1.87321
MEXAM1_RS02810	hypothetical protein	1.75467	2.94432	3.1024	3.43261	6.40707	2.68645	8.85042	5.56559	5.71561
MEXAM1_RS02815	ABC transporter ATP-binding protein	16.4055	12.1002	12.0743	12.4146	11.8229	12.4256	19.2765	22.0838	20.6046
MEXAM1_RS02820	hypothetical protein	10.7178	9.97406	10.5022	9.91155	9.71424	7.99959	17.107	14.9911	16.0065
MEXAM1_RS02825	hypothetical protein	59.3951	55.6198	60.9766	63.0763	57.6721	57.8305	33.7423	31.9958	33.2356
MEXAM1_RS02830	hypothetical protein	129.42	103.49	104.528	146.784	139.796	139.09	82.5004	99.5973	98.6913
MEXAM1_RS02835	flagellar biosynthesis protein FlhA	1.16969	1.08199	1.48327	1.22999	1.03824	1.11315	3.35509	2.7049	2.51661
MEXAM1_RS02840	HAMP domain-containing protein	2.00411	1.84862	1.93016	2.57618	3.7824	2.98091	5.8883	5.25693	5.83743
MEXAM1_RS02845	lysylphosphatidylglycerol synthetase family protein	17.9491	18.9341	17.3847	13.4945	16.4556	17.078	27.4059	25.7245	25.331
MEXAM1_RS02850	flagellar export protein FliJ	26.1274	21.7718	21.9495	19.2557	32.2896	23.5189	91.1222	98.4473	100.41
MEXAM1_RS02855	flagellum-specific ATP synthase FliI	5.00752	4.16574	4.60982	5.93117	5.15747	5.09657	3.89109	3.88077	4.34298
MEXAM1_RS02860	DNA-binding response regulator	50.9263	52.6705	55.4544	49.3342	58.586	62.2896	138.521	133.067	130.755
MEXAM1_RS02865	hypothetical protein	4.02773	6.98769	6.37879	7.47932	6.22189	9.7251	11.452	11.227	11.3527
MEXAM1_RS02870	DUF3297 domain-containing protein	48.0652	62.0123	59.8025	61.5228	45.3146	74.6309	50.0089	54.8444	61.5222
MEXAM1_RS02875	antibiotic acetyltransferase	2.09077	3.13753	2.82925	3.57144	2.57858	2.35473	5.65322	5.32459	5.68471
MEXAM1_RS02880	NADP-dependent malic enzyme	11.0602	11.0883	11.0678	9.7379	11.5279	10.3662	10.2785	10.0191	11.142
MEXAM1_RS02885	acetamidase	7.56151	8.33863	8.35573	6.80313	6.18091	6.12949	3.42094	4.60063	4.46768
MEXAM1_RS02890	hypothetical protein	342.045	298.291	335.191	343.898	257.492	289.946	102.664	84.9121	87.7242
MEXAM1_RS02895	hypothetical protein	1.16504	1.92339	1.36304	1.61068	1.6789	2.1776	0.731539	1.36755	1.40882
MEXAM1_RS02900	glycosyl transferase	1.59079	1.35827	1.50888	1.17247	1.58905	1.30052	1.08643	1.06033	0.956811
MEXAM1_RS02905	hypothetical protein	1.69138	2.22172	1.92911	1.91733	1.53658	1.79516	1.53013	1.61164	1.52739
MEXAM1_RS02910	hypothetical protein	4.33256	3.51146	5.09542	4.13859	3.64884	4.35841	5.62851	5.94345	6.14767
MEXAM1_RS02915	hypothetical protein	7.96091	6.65494	7.81334	6.72214	5.26877	7.20889	9.39116	9.96945	9.31232
MEXAM1_RS02920	(2Fe-2S)-binding protein	10.9843	10.3274	9.398	17.1949	18.8679	14.2975	10.932	12.3309	14.6391
MEXAM1_RS02925	xanthine dehydrogenase family protein subunit M	5.60222	5.03294	5.77834	8.06389	8.00266	6.34651	5.2296	5.76456	5.78028
MEXAM1_RS02930	xanthine dehydrogenase family protein molybdopterin-binding subunit	5.13255	6.47635	6.18826	9.46158	9.2542	8.44205	5.04414	3.97628	5.71972
MEXAM1_RS02935	fluoride efflux transporter CrcB	2.69747	3.88493	3.29077	5.67842	2.12456	5.7011	3.60417	3.01601	2.59732
MEXAM1_RS02940	EamA family transporter	6.94014	4.39949	5.89608	5.89585	7.17889	4.42229	7.30823	8.12183	5.18532
MEXAM1_RS02945	peptidase M15	2.35635	1.71814	2.46094	2.58638	2.89207	2.68994	2.81989	3.52864	2.84287
MEXAM1_RS02950	hypothetical protein	679.066	673.495	652.096	657.212	536.715	696.522	755.719	761.455	712.138
MEXAM1_RS02955	hypothetical protein	614.868	665.597	637.678	575.658	506.418	563.005	911.45	905.291	814.953
MEXAM1_RS02960	MarR family transcriptional regulator	28.7372	27.457	30.9741	23.6909	22.6691	28.3223	47.3016	46.1836	46.0102
MEXAM1_RS02965	glycosyl transferase	1.55434	1.12303	1.21741	1.49673	1.41257	1.39457	1.7319	1.42905	2.27408
MEXAM1_RS02970	glucose-1-phosphate cytidylyltransferase	2.05503	2.96707	3.14282	3.76801	2.99621	2.49327	4.10454	5.44954	3.12669
MEXAM1_RS02975	CDP-glucose 4,6-dehydratase	3.23355	3.63072	3.15136	2.93066	2.70059	2.81564	3.71163	4.14085	3.56706
MEXAM1_RS02980	class I SAM-dependent methyltransferase	3.72165	2.97375	3.90094	4.0822	2.95412	3.2851	2.56829	3.91585	4.2733
MEXAM1_RS02985	dTDP-4-keto-6-deoxy-D-glucose epimerase	1.47227	2.6388	2.85577	1.95911	3.87303	2.17905	2.11636	1.45928	1.09927
MEXAM1_RS02990	NAD(P)-dependent oxidoreductase	9.6952	9.46139	9.33912	9.75974	9.39232	8.01846	5.9502	4.74587	4.43103
MEXAM1_RS02995	response regulator	273.987	290.92	282.879	302.759	277.384	249.889	127.864	132.051	127.968
MEXAM1_RS03000	adenosylmethionine--8-amino-7-oxononanoate transaminase	0.876252	1.37698	1.0694	0.975926	1.24597	1.38487	1.15787	0.925037	1.47443
MEXAM1_RS03005	glycine dehydrogenase (aminomethyl-transferring)	2.30702	2.41001	2.6925	2.52737	2.6836	3.3495	2.15043	2.06662	2.26732
MEXAM1_RS03010	glycine cleavage system protein H	15.3403	11.8655	9.90264	13.0772	15.5618	11.5498	13.6503	13.9282	12.0869
MEXAM1_RS03015	glycine cleavage system protein T	14.0164	11.1072	11.0272	12.0169	12.6056	11.2599	19.86	24.7731	21.6209
MEXAM1_RS03020	hypothetical protein	206.261	200.855	145.524	201.549	205.217	192.1	93.4932	93.5206	102.077
MEXAM1_RS03025	8-amino-7-oxononanoate synthase	1.99663	1.48457	1.1865	1.18605	1.23393	0.941502	1.28543	1.57948	2.0558
MEXAM1_RS03030	NlpC/P60 family protein	4.23853	2.128	3.49935	2.2825	1.74433	3.28431	6.57233	5.52698	6.92843
MEXAM1_RS03035	hypothetical protein	486.31	385.254	425.503	415.382	388.011	414.771	1004.97	1114.52	958.622
MEXAM1_RS03040	short-chain dehydrogenase	19.2932	18.1304	18.2632	15.6254	19.4488	20.3495	43.3821	40.7016	40.0412
MEXAM1_RS03045	MgtC/SapB family protein	1.88398	1.0972	2.28662	2.08928	2.27653	3.42982	2.98983	2.38343	2.65885
MEXAM1_RS03050	ATPase AAA	7.33864	7.31635	8.43252	6.8845	6.52381	7.63201	4.1945	4.97003	4.30255
MEXAM1_RS03055	DUF58 domain-containing protein	1.42752	1.79596	2.0969	2.25639	1.76465	2.29692	0.731661	0.588345	0.657503
MEXAM1_RS03060	DUF4381 domain-containing protein	2.41688	2.23208	1.66747	4.1456	2.68026	1.45017	0.789802	0.664275	0.164256
MEXAM1_RS03065	VWA domain-containing protein	1.50008	1.73931	1.19087	1.63066	1.38638	0.637992	0.430507	0.820228	0.535594
MEXAM1_RS03070	VWA domain-containing protein	2.53763	2.74718	2.64439	1.79356	2.10993	1.12552	1.27956	0.890575	0.816484
MEXAM1_RS03075	tetratricopeptide repeat protein	2.21382	1.60095	2.21742	2.02451	1.93529	2.46143	0.81833	0.773956	0.598949
MEXAM1_RS03080	hypothetical protein	3.0281	2.87874	3.39237	2.79046	3.00664	3.10218	0.899841	0.990743	1.38287
MEXAM1_RS03085	catalase	6.39526	6.94515	7.41713	8.42131	5.89878	5.65795	3.76455	2.866	3.53667
MEXAM1_RS03090	EamA/RhaT family transporter	24.2093	24.5671	24.4537	37.5359	33.2956	30.046	7.45051	7.16476	7.49598
MEXAM1_RS03095	hypothetical protein	1457.19	1605.34	1784.04	2137.58	2042.25	1930.5	468.224	428.347	493.878
MEXAM1_RS03100	hypothetical protein	101.905	103.652	109.167	92.8408	96.2153	85.5174	98.8516	96.9037	94.2095
MEXAM1_RS03105	peptide-methionine (R)-S-oxide reductase	182.65	172.097	187.564	175.897	182.078	175.79	84.8544	91.8269	95.5166
MEXAM1_RS03110	YihY/virulence factor BrkB family protein	4.98522	5.23977	5.2799	6.34059	6.60334	6.38573	6.68287	5.09292	5.84137
MEXAM1_RS03115	PAS domain S-box protein	6.36968	6.95638	6.66224	6.04063	5.5681	6.28818	5.95544	8.50661	6.9046
MEXAM1_RS03120	malonyl-CoA synthase	6.79647	7.21212	7.47279	5.98401	6.88146	7.77997	8.53687	9.09035	7.85788
MEXAM1_RS03125	hypothetical protein	17.0774	10.1084	9.76312	13.0607	8.21234	11.6906	11.7546	16.1559	11.3083
MEXAM1_RS03130	collagen-like protein	23.52	22.4785	27.4095	22.0853	18.9537	19.8848	15.0722	15.9834	15.2237
MEXAM1_RS03135	aminoacetone oxidase family FAD-binding enzyme	2.46483	2.42602	2.51195	2.72229	2.10342	3.16752	2.34615	2.5137	2.46707
MEXAM1_RS03140	TerC family protein	12.622	9.99978	11.9482	9.22899	13.8719	12.0287	22.6397	19.3586	21.7
MEXAM1_RS03145	hypothetical protein	50.4807	77.6677	65.2557	60.2316	76.9158	75.2678	114.809	111.306	117.183
MEXAM1_RS03150	type 1 glutamine amidotransferase	444.764	443.768	469.039	646.946	626.861	543.138	121.818	110.559	111.766
MEXAM1_RS03155	hypothetical protein	409.466	499.06	597.765	607.272	611.734	596.367	193.72	194.886	199.317
MEXAM1_RS03160	hypothetical protein	24.4307	21.2821	26.679	31.6952	32.9287	24.8224	17.7526	21.9039	20.8958
MEXAM1_RS03165	hypothetical protein	89.5194	100.449	86.7304	84.8756	90.9432	95.7821	101.476	105.501	100.22
MEXAM1_RS03170	cold-shock protein	6536.54	5568.48	6013.32	5456.92	5964.99	5616.6	4721.97	4331.01	4947.56
MEXAM1_RS03175	hypothetical protein	270.206	298.214	235.896	280.75	371.29	349.317	452.747	409.699	432.114
MEXAM1_RS03180	DUF1489 domain-containing protein	8.53869	10.9336	9.76312	13.7863	15.9684	13.0659	16.4915	14.6703	11.4906
MEXAM1_RS03185	hypothetical protein	3.08122	3.16212	3.1358	3.15287	4.41163	4.52223	11.8458	11.1812	13.3167
MEXAM1_RS03190	MFS transporter	1.44887	1.44184	1.3862	1.45973	2.09624	1.59006	1.48972	1.41942	1.58005
MEXAM1_RS03195	STAS domain-containing protein	10.0679	10.5143	9.18347	8.64043	9.01282	8.50166	9.54406	8.55083	8.82373
MEXAM1_RS03200	ABC transporter ATP-binding protein	6.0775	5.5451	5.91851	5.05731	5.24276	5.43239	16.0778	13.1024	16.0949
MEXAM1_RS03205	MCE family protein	18.964	17.3532	19.5127	16.1358	17.2553	20.1134	28.3641	24.1416	28.6618
MEXAM1_RS03210	ABC transporter	45.9967	46.7033	37.2094	42.7035	61.1946	57.1987	91.6289	74.1691	77.3663
MEXAM1_RS03215	inositol monophosphatase	51.708	49.9298	47.4955	51.1372	52.1804	49.5833	50.7648	46.2248	48.2932
MEXAM1_RS03220	hypothetical protein	25.1993	23.7277	22.9921	30.0884	34.4431	33.9091	43.032	35.7758	42.0863
MEXAM1_RS03225	hypothetical protein	594.914	567.634	615.575	660.679	612.805	585.72	442.814	352.513	493.123
MEXAM1_RS03230	4-hydroxybenzoate octaprenyltransferase	3.0329	2.41647	1.59835	2.1889	2.72676	2.16487	7.99522	7.22362	7.35792
MEXAM1_RS03235	hypothetical protein	46.3836	32.9544	32.2159	27.2194	27.7652	29.5246	112.33	97.9318	101.232
MEXAM1_RS03240	16S rRNA (uracil(1498)-N(3))-methyltransferase	3.31301	5.01445	4.34857	4.15729	3.96591	2.83243	3.43495	3.67824	5.68765
MEXAM1_RS03245	asparaginase	5.47728	5.31311	4.09432	4.56139	6.48212	5.83939	7.45339	5.93914	6.69735
MEXAM1_RS03250	glutamate--cysteine ligase	15.6033	15.1401	15.555	18.5102	21.1899	17.9594	18.7218	17.1968	18.6382
MEXAM1_RS03255	hypothetical protein	219.831	242.528	245.641	261.878	238.275	252.268	55.4939	59.3	56.1576
MEXAM1_RS03260	transcriptional regulator	5.1441	6.85826	9.81917	9.14145	13.38	4.79247	1.46735	2.36076	5.34501
MEXAM1_RS03265	NUDIX hydrolase	7.61489	6.71826	9.28216	6.73225	6.95263	7.2644	6.5232	7.14492	6.77387
MEXAM1_RS03270	DUF3775 domain-containing protein	366.357	401.659	416.275	427.37	347.597	349.555	121.807	117.084	119.095
MEXAM1_RS03275	hypothetical protein	276.898	332.754	325.085	286.852	265.988	254.9	100.528	91.9215	93.749
MEXAM1_RS03280	TIGR02281 family clan AA aspartic protease	5.85547	6.13944	5.27886	4.19436	5.49662	6.32414	4.87956	3.8908	4.05063
MEXAM1_RS03285	NA	5.18022	8.35231	1.81757	9.92187	1.66241	12.9063	4.65796	0	3.66832
MEXAM1_RS03290	hypothetical protein	1.40725	0.82891	1.1876	1.51929	2.58505	1.45411	1.86533	0.553513	2.66159
MEXAM1_RS03295	adenosylcobinamide-GDP ribazoletransferase	4.72177	6.06723	5.54763	4.34263	4.83797	5.78401	5.0544	5.85201	6.31426
MEXAM1_RS03300	nicotinate-nucleotide--dimethylbenzimidazole phosphoribosyltransferase	6.56633	6.94813	5.94801	5.60663	4.68571	5.21472	6.6039	7.12542	7.19528
MEXAM1_RS03305	sensor histidine kinase	2.53535	2.74284	1.89468	2.48499	2.76109	3.53385	5.37831	4.79357	6.50247
MEXAM1_RS03310	(2Fe-2S)-binding protein	234.999	214.918	221.518	227.621	277.553	253.511	528.84	554.161	546.864
MEXAM1_RS03315	xanthine dehydrogenase family protein molybdopterin-binding subunit	29.1878	26.7844	25.749	22.9848	30.7438	24.5251	43.7628	44.9658	49.7421
MEXAM1_RS03320	PAS domain S-box protein	3.36554	3.33742	3.67978	3.29674	2.96605	2.82014	3.7035	3.74737	3.97778
MEXAM1_RS03325	amidase	2.66074	2.94667	4.63862	4.1862	2.65715	3.11969	3.7168	3.77927	3.26245
MEXAM1_RS03330	extensin	1.56112	1.4905	1.92736	2.57643	3.06472	2.47381	8.64719	6.83404	9.47634
MEXAM1_RS03335	hypothetical protein	27.5562	25.6871	31.0574	25.4719	30.9009	29.8389	70.7962	70.9208	71.698
MEXAM1_RS03340	ribonuclease T(2)	5.778	6.21441	7.77361	7.2128	8.53813	6.06627	11.1933	9.0803	11.1284
MEXAM1_RS03345	23S rRNA (adenine(2030)-N(6))-methyltransferase RlmJ	10.9642	9.4798	9.50166	12.3499	9.87828	12.4008	3.9346	4.63489	4.45187
MEXAM1_RS03350	hypothetical protein	394.716	369.242	416.207	504.237	388.982	353.098	90.8805	90.1512	97.27
MEXAM1_RS03355	hypothetical protein	1244.93	1458.33	1300.33	1572.08	1485.71	1372.74	325.685	270.054	276.458
MEXAM1_RS03360	FAD-binding oxidoreductase	68.9059	70.9385	70.3279	64.3282	62.7987	58.9588	34.7188	35.6292	35.1989
MEXAM1_RS03365	cystathionine beta-lyase	318.514	326.131	330.662	369.332	444.251	390.458	297.402	276.981	366.233
MEXAM1_RS03370	MarR family transcriptional regulator	248.053	217.91	222.934	224.68	216.357	206.015	276.177	294.989	299.715
MEXAM1_RS03375	hypothetical protein	7.94751	6.75675	7.9865	7.95379	6.69756	6.22955	7.95534	6.03668	8.06451
MEXAM1_RS03380	DUF1214 domain-containing protein	4.68554	6.62178	3.60375	4.79725	4.12719	3.33414	5.24695	4.83783	4.2569
MEXAM1_RS03385	penicillin-binding protein 1A	11.7009	10.7082	10.7428	10.5315	9.15884	11.0225	13.984	13.2076	15.0779
MEXAM1_RS03390	YcgN family cysteine cluster protein	24.6957	25.862	21.6143	28.8341	24.812	19.4135	27.0969	21.9217	25.5835
MEXAM1_RS03395	GNAT family N-acetyltransferase	40.3108	44.6533	40.5768	45.9842	53.359	44.9736	75.3883	71.9079	70.7727
MEXAM1_RS03400	pilus assembly protein	2.46027	0.914178	2.01515	2.30375	2.33351	1.46532	5.74565	5.69699	4.93462
MEXAM1_RS03405	pilus biosynthesis protein TadE	1.9801	1.3494	2.87615	1.59189	1.4442	1.67934	3.46741	2.92371	3.30131
MEXAM1_RS03410	VWA domain-containing protein	2.36243	2.55347	2.30586	2.06432	3.19477	2.09988	6.38246	3.74348	6.17555
MEXAM1_RS03415	cell division protein ZapE	3.97104	3.63218	3.48608	3.42251	4.10743	4.81856	4.53029	2.98335	3.45067
MEXAM1_RS03420	DNA-3-methyladenine glycosylase	3.56661	3.03295	6.46685	4.67982	2.9302	3.41435	5.0349	4.15137	6.50991
MEXAM1_RS03425	ribonuclease HI	8.22698	7.92069	6.17552	5.86013	6.92792	7.37443	10.337	10.2004	10.4044
MEXAM1_RS03430	hypothetical protein	2.24466	1.61745	2.84783	2.51453	3.72405	2.07785	4.15171	4.07083	3.47076
MEXAM1_RS03435	hypothetical protein	13.2179	13.0026	24.1755	22.4795	20.3916	15.8308	57.6374	44.9544	53.6122
MEXAM1_RS03440	hypothetical protein	328.832	396.805	336.579	319.319	335.63	314.464	272.157	319.129	293.113
MEXAM1_RS03445	glutathione synthase	13.2878	12.4865	14.8581	14.1518	11.847	13.5232	11.5342	11.9097	12.1038
MEXAM1_RS03450	Na+/H+ antiporter	3.43917	3.82476	3.03392	3.36373	2.55219	3.23611	2.81539	3.19889	2.53025
MEXAM1_RS03455	N-acetylmuramoyl-L-alanine amidase	16.9331	16.4537	12.5401	12.3795	14.2773	13.277	18.6941	18.3243	14.596
MEXAM1_RS03460	molecular chaperone DjlA	77.6253	72.5346	64.6365	57.9819	52.0317	52.0728	86.7297	96.0178	79.2579
MEXAM1_RS03465	hypothetical protein	2228.75	1932.7	2057.74	1781.51	1903.33	1977.72	3209.93	3240.1	2872.81
MEXAM1_RS03470	hypothetical protein	274.73	218.39	236.689	328.84	316.189	252.919	255.041	274.355	257.817
MEXAM1_RS03475	tRNA dihydrouridine(20/20a) synthase DusA	5.25973	4.12756	5.46999	5.65511	4.77607	5.71977	5.66054	4.55785	5.24612
MEXAM1_RS03480	bifunctional diguanylate cyclase/phosphodiesterase	1.89773	1.97358	2.04637	1.86663	1.81405	1.70256	2.35531	2.18124	2.71145
MEXAM1_RS03485	response regulator	2.984	3.88397	1.98876	3.64423	5.1615	2.59332	14.8529	15.6616	16.4764
MEXAM1_RS03490	blue-light sensor BLUF	1.28168	1.98985	2.08594	4.88211	5.41769	3.02422	15.8178	14.3454	18.683
MEXAM1_RS03495	flagellar hook protein FlgE	1.54784	1.07742	1.08004	1.72467	1.80949	2.01393	7.6546	5.35991	6.47976
MEXAM1_RS03500	flagellar hook-associated protein FlgK	1.28641	1.28926	1.26844	1.32646	1.4073	1.62989	4.41206	3.72515	3.76117
MEXAM1_RS03505	hypothetical protein	1.55327	1.60647	1.58586	1.62759	1.70499	1.18929	5.20547	3.74708	4.17303
MEXAM1_RS03510	DUF4167 domain-containing protein	55.2947	55.2704	56.021	60.1474	74.9698	69.4063	80.804	81.8165	83.551
MEXAM1_RS03515	peptide chain release factor N(5)-glutamine methyltransferase	2.45244	1.96682	2.22407	2.32092	2.07913	2.15736	2.7951	3.07345	2.73742
MEXAM1_RS03520	peptide chain release factor 1	4.75156	5.32388	4.63216	4.84007	4.15205	4.97032	4.67728	5.00115	4.97204
MEXAM1_RS03525	hypothetical protein	13.1119	11.6344	10.907	12.3467	15.7517	10.7285	10.1453	10.7494	13.8983
MEXAM1_RS03530	phosphoenolpyruvate--protein phosphotransferase	8.22582	8.53079	7.53243	8.11984	7.63416	7.70699	7.41013	7.80589	8.11996
MEXAM1_RS03535	aspartate kinase	8.66209	9.06664	8.37487	8.63374	9.30558	8.48044	12.8974	12.2116	12.9156
MEXAM1_RS03540	bifunctional 2-polyprenyl-6-hydroxyphenol methylase/3-demethylubiquinol 3-O-methyltransferase UbiG	4.83834	4.76501	4.27322	6.18915	5.63045	6.29347	6.53774	7.17664	6.35856
MEXAM1_RS03545	YbhB/YbcL family Raf kinase inhibitor-like protein	22.8479	27.1062	28.4323	30.8846	30.4423	28.1138	12.6987	11.675	12.7568
MEXAM1_RS03550	NADPH:quinone oxidoreductase family protein	11.1261	11.8554	13.03	12.8497	10.949	10.8103	5.80586	5.28118	5.69038
MEXAM1_RS03555	crossover junction endodeoxyribonuclease RuvC	4.78685	5.29964	4.91496	5.50966	5.23538	6.92042	8.75416	7.71737	11.3629
MEXAM1_RS03560	polyisoprenoid-binding protein	12.4173	12.6725	14.2559	14.9252	11.2782	16.0871	19.7868	18.4561	17.364
MEXAM1_RS03565	Holliday junction branch migration protein RuvA	7.87114	7.73925	7.67939	6.89658	6.68087	7.7706	7.59652	7.12953	7.97694
MEXAM1_RS03570	DUF3572 domain-containing protein	24.6252	32.5226	29.1918	21.1234	29.3456	23.2876	25.6589	30.6263	29.0324
MEXAM1_RS03575	response regulator	15.1679	12.4635	14.7274	19.4443	17.2322	15.3708	43.3684	37.1183	36.1783
MEXAM1_RS03580	PleD family two-component system response regulator	3.58495	3.304	3.14178	2.86883	5.13072	3.03478	9.50289	8.77384	9.63666
MEXAM1_RS03585	IS256 family transposase	2.98373	3.20813	3.39494	3.56506	3.34035	3.45914	1.33084	1.48503	1.48502
MEXAM1_RS03590	PleD family two-component system response regulator	3.21893	2.7307	3.70088	3.74327	3.20973	3.73407	6.42777	6.81212	7.34721
MEXAM1_RS03595	Rrf2 family transcriptional regulator	10.5992	7.2181	9.47859	8.47233	9.77061	9.22857	12.2528	11.1175	9.63136
MEXAM1_RS03600	NO-inducible flavohemoprotein	57.6256	56.0843	54.6625	56.2902	53.2269	52.8962	71.8892	82.0023	63.681
MEXAM1_RS03605	hypothetical protein	640.809	682.747	671.703	796.524	680.941	663.433	184.839	158.24	142.109
MEXAM1_RS03610	hypothetical protein	325.482	350.894	379.125	437.305	370.817	354.481	105.043	108.072	117.138
MEXAM1_RS03615	cysteine synthase A	26.6142	30.1235	35.0487	23.5365	27.1899	26.6288	31.4787	31.1408	29.4865
MEXAM1_RS03620	META domain-containing protein	82.7515	67.8582	74.9507	50.8958	53.0589	51.2304	147.559	146.909	143.619
MEXAM1_RS03625	hypothetical protein	657.002	642.135	641.595	692.885	643.579	600.012	196.188	204.003	239.31
MEXAM1_RS03630	pyridine nucleotide-disulfide oxidoreductase	17.731	17.3883	17.5222	19.4141	16.748	19.4281	7.74487	7.70199	7.57774
MEXAM1_RS03635	LysR family transcriptional regulator	21.7308	22.5705	21.7516	24.0048	24.3375	21.2385	22.7605	22.8851	22.2044
MEXAM1_RS03640	class 1 fructose-bisphosphatase	33.1276	35.0392	33.8817	37.8518	32.8446	31.3693	41.243	39.3465	40.1136
MEXAM1_RS03645	phosphoribulokinase	6.20642	6.31951	6.83206	6.54318	8.14022	6.71459	7.33277	7.38755	7.77336
MEXAM1_RS03650	hypothetical protein	7.6461	8.89032	7.79098	8.47914	7.41597	9.23945	9.89675	9.39053	9.1459
MEXAM1_RS03655	YebC/PmpR family DNA-binding transcriptional regulator	25.0552	27.5958	27.1215	19.7279	26.2204	24.6325	23.2672	24.4443	26.6344
MEXAM1_RS03660	MBL fold metallo-hydrolase	21.447	25.2663	23.5923	23.8592	21.5183	21.2146	9.02333	7.38197	8.25762
MEXAM1_RS03665	hypothetical protein	26.0728	21.86	32.2364	15.7614	27.7717	19.9584	21.8811	19.2181	22.8457
MEXAM1_RS03670	GNAT family N-acetyltransferase	1.88711	2.05645	2.2559	1.90062	2.37478	1.67403	2.36915	2.29511	2.68977
MEXAM1_RS03675	polysaccharide biosynthesis protein	0.491399	0.45423	0.814335	1.03205	1.18635	0.754265	1.29237	1.31793	1.36985
MEXAM1_RS03680	hypothetical protein	15.4875	16.4223	16.5161	15.0146	14.4182	13.2603	18.6109	20.175	19.7174
MEXAM1_RS03685	OpgC domain-containing protein	2.69818	2.52242	2.17588	2.0382	2.60099	2.41044	2.79178	2.27145	3.3184
MEXAM1_RS03690	phosphatase	20.702	20.6284	18.8782	16.7005	15.241	14.5241	33.547	37.6897	29.617
MEXAM1_RS03695	ribulose-phosphate 3-epimerase	38.6413	41.8706	33.2638	36.8176	33.1461	31.5527	77.099	84.2488	65.4516
MEXAM1_RS03700	N-acetyltransferase	5.08222	3.9971	4.45215	5.34177	4.35639	4.74085	5.56703	7.56164	7.86332
MEXAM1_RS03705	amino acid decarboxylase	6.42215	6.08524	5.77008	5.59612	5.66712	6.54342	9.2102	9.42961	9.10103
MEXAM1_RS03710	energy transducer TonB	12.1108	15.5946	9.04154	18.2288	19.2669	16.3933	18.5877	23.7412	20.5477
MEXAM1_RS03715	molybdenum cofactor biosynthesis protein B	40.7027	33.0362	32.7715	37.652	34.0453	32.9115	42.0285	41.1806	45.2219
MEXAM1_RS03720	adenylosuccinate lyase	13.35	17.2706	18.2141	17.9844	14.5709	16.1496	15.334	15.0208	17.5146
MEXAM1_RS03725	D-amino-acid transaminase	19.8525	16.7193	16.578	17.8912	16.4332	16.8687	18.1772	18.2601	18.3978
MEXAM1_RS03730	hypothetical protein	475.878	520.543	483.389	595.398	530.362	448.862	176.058	184.027	169.362
MEXAM1_RS03735	adenylosuccinate synthetase	19.1188	21.7857	23.2655	21.0527	21.1014	19.1253	18.2218	18.6307	19.6758
MEXAM1_RS03740	hypothetical protein	6.81628	6.45614	8.02997	6.53365	5.39201	6.46618	5.37235	5.48512	4.81592
MEXAM1_RS03745	RNA polymerase sigma factor RpoH	677.081	659.055	672.661	604.53	602.574	566.907	566.138	564.986	580.282
MEXAM1_RS03750	GGDEF-domain containing protein	3.54291	2.77846	2.99094	4.29119	3.35338	4.51337	6.15404	6.37133	7.01984
MEXAM1_RS03755	hypothetical protein	24.6917	33.434	18.5473	20.3143	24.8485	28.7548	8.80412	5.50844	3.81786
MEXAM1_RS03760	N-acetyltransferase	7.68926	10.6429	8.07181	9.93836	10.2551	6.35855	8.04139	4.77451	4.35591
MEXAM1_RS03765	RluA family pseudouridine synthase	2.24502	3.12297	2.93162	2.73559	2.16162	2.62726	3.26381	3.22946	3.60342
MEXAM1_RS03770	tRNA-Glu	22.0759	18.3985	5.59036	7.51123	21.238	21.5178	30.6806	21.6756	29.3678
MEXAM1_RS03775	ribosome small subunit-dependent GTPase A	2.88379	3.1612	2.46615	3.13985	3.68347	3.41383	2.82904	2.66659	4.15866
MEXAM1_RS03785	IS3 family transposase	6.0325	6.54439	4.06662	3.48933	2.78199	5.99509	5.28629	6.39877	7.18048
MEXAM1_RS03790	tRNA-Met	15.7223	22.5974	13.6074	32.7888	28.1622	25.8784	37.5625	18.0724	36.391
MEXAM1_RS03795	5S ribosomal RNA	158.749	138.404	120.664	184.799	123.843	158.957	161.949	194.343	256.801
MEXAM1_RS03800	23S ribosomal RNA	23.7904	27.9146	45.4963	36.872	30.957	49.0992	15.3445	20.7297	13.0807
MEXAM1_RS03805	tRNA-Ala	23.4344	27.5977	13.7896	29.0434	18.1489	21.0397	20.0231	10.9245	20.4562
MEXAM1_RS03810	tRNA-Ile	18.0151	25.2048	16.409	27.5616	14.8858	24.5164	14.7787	15.5389	17.507
MEXAM1_RS03815	16S ribosomal RNA	9.89011	11.1701	22.0552	16.7523	13.8957	26.9124	7.07267	9.00185	5.8732
MEXAM1_RS03820	M23 family peptidase	6.22594	6.46885	6.14268	5.09844	5.10808	4.83552	9.32367	9.2176	11.4437
MEXAM1_RS03825	DUF1311 domain-containing protein	3.60761	7.24449	7.85	7.18513	8.23558	8.45527	8.73694	9.53332	11.2093
MEXAM1_RS03830	tRNA glutamyl-Q(34) synthetase GluQRS	2.36917	2.38589	1.81843	2.02136	1.65561	1.93956	2.62745	2.48847	2.778
MEXAM1_RS03835	hypothetical protein	22.4267	26.707	28.2926	19.7734	31.7572	23.8967	23.8482	25.1195	21.0661
MEXAM1_RS03840	hypothetical protein	63.9369	70.4389	96.8399	70.5574	94.6381	82.1882	74.0766	68.6057	70.2291
MEXAM1_RS03845	molecular chaperone HtpG	26.3802	29.2803	27.7129	23.4833	25.5006	23.8112	19.3439	19.3975	22.6066
MEXAM1_RS03850	hypothetical protein	1.24156	5.20476	5.26308	3.63724	5.10093	7.41313	25.9001	22.1748	16.7846
MEXAM1_RS03855	gamma-glutamyltranspeptidase	21.7637	23.8994	23.9094	17.5965	18.0911	18.7255	20.7709	20.5479	22.5687
MEXAM1_RS03860	DAK2 domain-containing protein	153.975	137.495	132.251	113.986	96.9185	106.512	135.313	139.121	119.644
MEXAM1_RS03865	methyltransferase domain-containing protein	92.1131	93.6024	85.3211	75.3544	61.4476	62.6752	85.9427	95.9513	79.0147
MEXAM1_RS03870	oxalate/formate MFS antiporter	27.6869	22.3357	21.1351	20.6265	16.5039	16.697	14.9982	15.8579	14.2277
MEXAM1_RS03875	bifunctional cobalt-precorrin-7 (C(5))-methyltransferase/cobalt-precorrin-6B (C(15))-methyltransferase	2.43475	1.59765	1.91278	2.83073	2.03277	2.04075	1.57858	1.94581	1.63621
MEXAM1_RS03880	precorrin methylase	7.93987	6.93051	5.42825	3.14401	3.94779	4.2164	5.52051	2.43044	2.57303
MEXAM1_RS03885	GGDEF domain-containing protein	0.603413	0.795225	0.78671	1.54664	0.73996	1.00824	1.92837	1.69433	1.46869
MEXAM1_RS03890	LysR family transcriptional regulator	1.05228	1.67391	1.31356	1.83432	1.8879	1.08326	1.45986	2.22781	2.03577
MEXAM1_RS03895	membrane protein	2.88279	3.04691	2.3388	4.52569	3.37094	4.29048	5.52729	4.01844	5.38818
MEXAM1_RS03900	precorrin-4 C(11)-methyltransferase	0.923682	2.78913	1.84706	1.9401	2.7378	2.26434	2.89288	1.94782	2.06283
MEXAM1_RS03905	cobyrinate a,c-diamide synthase	3.0027	2.52526	2.46381	2.94009	2.56749	3.07634	3.66147	3.71441	4.46455
MEXAM1_RS03910	XRE family transcriptional regulator	146.782	156.317	171.485	114.17	121.62	128.351	228.247	229.423	236.443
MEXAM1_RS03915	antibiotic biosynthesis monooxygenase	237.041	245.542	243.879	179.929	177.445	191.171	253.516	254.064	235.969
MEXAM1_RS03920	MFS transporter	6.19851	5.32717	6.02702	4.10188	4.15079	4.74954	5.34225	5.26895	6.25946
MEXAM1_RS03925	sugar transferase	2.82859	2.8215	2.67973	2.81547	3.15942	3.45661	2.66106	2.75504	3.22187
MEXAM1_RS03930	transcriptional repressor	69.9936	59.9539	57.2533	63.6838	54.6537	60.8319	40.5967	47.68	42.3503
MEXAM1_RS03935	ABC transporter	2.70285	1.57589	2.35004	2.00273	2.66572	1.71587	1.73538	1.79731	2.64634
MEXAM1_RS03940	metal ABC transporter permease	1.75152	3.11966	3.06616	3.12018	2.9032	2.07157	3.19973	3.57322	3.55552
MEXAM1_RS03945	DNA polymerase III subunit alpha	2.23908	2.50218	2.27782	2.7887	3.72889	3.15294	5.84599	4.85431	5.39693
MEXAM1_RS03950	murein transglycosylase	14.3313	14.41	14.7138	11.5322	15.31	14.8774	41.6411	34.3829	41.2635
MEXAM1_RS03955	calcium transporter ChaC	4.15417	4.06539	3.53368	3.22893	3.27603	4.28773	8.64912	7.42417	7.89151
MEXAM1_RS03960	hypothetical protein	4.87248	3.55544	4.87845	4.15872	4.80411	7.54858	5.36885	5.03833	4.8605
MEXAM1_RS03965	DNA repair protein RecO	10.1829	10.5955	9.84112	8.70662	10.8317	11.2415	12.9274	14.3996	14.9559
MEXAM1_RS03970	DNA topoisomerase IV subunit A	8.31078	9.54111	8.66214	9.76568	10.0837	9.67228	11.174	10.9519	11.8
MEXAM1_RS03975	translation initiation factor IF-1	439.616	476.831	431.417	442.725	496.958	416.352	398.482	386.151	449.367
MEXAM1_RS03980	branched-chain amino acid ABC transporter substrate-binding protein	6.31496	6.70889	6.31804	5.76673	5.93116	5.12629	7.79377	6.8781	7.44246
MEXAM1_RS03985	XshC-Cox1-family protein	128.898	118.753	122.496	153.405	121.839	135.17	129.51	121.665	122.387
MEXAM1_RS03990	hypothetical protein	15.7559	17.4439	15.501	19.4975	20.9982	17.8383	18.8741	17.7282	18.2135
MEXAM1_RS03995	molybdopterin-binding protein	15.1789	15.7874	14.1913	13.8104	13.2669	12.6752	9.23517	9.26271	7.67781
MEXAM1_RS04000	nucleotidyltransferase family protein	7.41744	6.87808	6.34508	7.5557	8.59578	7.4751	4.36003	4.47	4.72794
MEXAM1_RS04005	formyl transferase	3.44765	3.2567	3.63045	3.84259	3.88688	3.39716	4.35664	3.25053	3.62551
MEXAM1_RS04010	short-chain dehydrogenase	11.9127	11.3616	11.8368	10.6097	9.72029	10.9468	5.23472	4.86765	5.73764
MEXAM1_RS04015	cellulose biosynthesis protein BcsS	0.632811	1.00063	0.695514	1.45222	0.865968	1.47851	1.88175	1.31323	0.673113
MEXAM1_RS04020	exopolysaccharide biosynthesis protein ExoD	6.14963	5.22769	3.36472	4.14658	6.61447	3.83343	7.58744	6.29959	8.07683
MEXAM1_RS04025	ABC transporter ATP-binding protein	4.21912	2.90702	3.86041	3.93047	4.89993	4.24604	5.40898	5.27047	6.06099
MEXAM1_RS04030	lipoprotein-releasing system transmembrane subunit LolC	4.48624	3.2387	3.38288	3.9131	3.83109	3.97141	7.08565	6.5141	6.4459
MEXAM1_RS04035	proline--tRNA ligase	5.36197	6.73404	4.7381	5.10193	5.75615	5.98639	12.7998	12.2791	12.5326
MEXAM1_RS04040	DUF1467 domain-containing protein	21.7783	18.2504	18.4263	17.9022	15.383	18.6641	24.9551	18.7569	19.6889
MEXAM1_RS04045	methylmalonyl-CoA epimerase	53.4561	58.7333	54.2282	47.9912	51.218	52.9175	30.662	35.9043	33.0207
MEXAM1_RS04050	MBL fold metallo-hydrolase	16.2611	17.3086	17.0498	14.9341	16.2264	15.9735	15.4255	14.3949	16.4179
MEXAM1_RS04055	biotin--[acetyl-CoA-carboxylase] ligase	8.23144	8.01394	7.41947	7.72108	8.42733	8.99202	6.52632	6.86404	7.99369
MEXAM1_RS04060	NADH-quinone oxidoreductase subunit NuoN	10.6637	11.7469	10.1554	11.5731	9.21517	8.64898	7.9822	7.06723	8.82006
MEXAM1_RS04065	NADH-quinone oxidoreductase subunit M	13.7639	14.4923	12.3488	13.8828	12.6703	14.5643	10.7147	9.72576	10.5123
MEXAM1_RS04070	NADH-quinone oxidoreductase subunit L	12.4056	12.7914	12.934	12.498	11.5082	13.0671	9.97914	10.555	10.8177
MEXAM1_RS04075	NADH-quinone oxidoreductase subunit NuoK	48.3154	41.6546	51.7507	43.1421	47.8647	57.389	54.6412	51.6171	50.8981
MEXAM1_RS04080	NADH-quinone oxidoreductase subunit J	16.1232	17.6423	14.7844	17.2691	21.1961	17.4642	16.0694	16.0602	19.1969
MEXAM1_RS04085	NADH-quinone oxidoreductase subunit I	50.4218	43.236	49.7499	53.4844	53.0115	53.0832	33.1763	33.1637	32.8797
MEXAM1_RS04090	NADH-quinone oxidoreductase subunit NuoH	13.9861	17.0708	16.5418	17.0255	17.2629	17.3326	10.5063	11.0076	12.3595
MEXAM1_RS04095	NADH-quinone oxidoreductase subunit G	13.0686	15.4484	15.1353	15.9067	14.3475	14.1791	9.02575	9.55453	9.63447
MEXAM1_RS04100	NADH-quinone oxidoreductase subunit NuoF	14.0845	16.0216	14.3441	17.8215	16.0513	17.1342	10.4175	9.51704	12.363
MEXAM1_RS04105	NADH-quinone oxidoreductase subunit NuoE	21.0992	19.8701	24.327	23.8002	20.6717	23.3299	15.6039	14.1137	16.8329
MEXAM1_RS04110	NADH-quinone oxidoreductase subunit D	17.7134	16.6574	17.4948	18.2406	18.0297	16.818	12.2844	12.384	11.128
MEXAM1_RS04115	NADH-quinone oxidoreductase subunit C	24.9805	23.9418	21.8139	20.6155	19.7436	20.265	25.4851	26.1293	24.1746
MEXAM1_RS04120	NADH-quinone oxidoreductase subunit B	22.925	23.6848	24.1762	20.3219	22.9751	23.9976	19.2322	19.5293	24.4743
MEXAM1_RS04125	NADH-quinone oxidoreductase subunit A	76.8884	70.5541	61.8502	75.9174	77.8638	73.5924	74.597	81.8751	105.092
MEXAM1_RS04130	tRNA-Asp	63.8718	63.012	78.0427	92.6641	68.394	70.371	70.8145	39.6917	45.2429
MEXAM1_RS04135	CAP domain-containing protein	213.757	221.461	233.084	210.062	176.46	196.297	120.947	126.665	103.586
MEXAM1_RS04140	pseudoazurin	7243.49	6927.39	7585.87	5621.54	5059.42	5323.59	3873.66	3870.78	3230.73
MEXAM1_RS04145	carbamoyl-phosphate synthase large subunit	9.74721	9.24211	10.2444	9.03932	8.42809	9.22383	10.985	10.9589	11.7509
MEXAM1_RS04150	transcription elongation factor GreA	65.1174	66.8574	70.7676	52.4672	66.7573	62.9185	80.4222	76.4153	74.791
MEXAM1_RS04155	hypothetical protein	21.3082	21.6849	23.3955	24.3661	21.1554	20.5563	22.9149	22.4639	28.1037
MEXAM1_RS04160	nucleoside-diphosphate sugar epimerase	9.92272	9.09248	8.61941	9.08975	10.1744	8.73368	8.14084	8.3732	9.9697
MEXAM1_RS04165	thioredoxin-disulfide reductase	31.9346	28.8517	31.4739	28.4131	31.2157	30.173	37.686	34.6185	41.8239
MEXAM1_RS04170	LysR family transcriptional regulator	21.7113	24.1551	21.2081	21.3234	24.5337	21.3648	47.879	41.9864	52.5477
MEXAM1_RS04175	type II 3-dehydroquinate dehydratase	10.6304	8.03788	7.84134	8.53016	14.4183	11.9299	14.3106	14.9033	15.8952
MEXAM1_RS04180	acetyl-CoA carboxylase biotin carboxyl carrier protein	19.804	16.5949	16.2375	18.0098	23.1659	15.7169	31.6586	26.2082	28.0336
MEXAM1_RS04185	acetyl-CoA carboxylase biotin carboxylase subunit	11.1457	12.1517	9.66812	9.8209	11.3607	9.08375	12.4359	12.6965	11.968
MEXAM1_RS04190	leucyl/phenylalanyl-tRNA--protein transferase	10.4658	11.1303	12.1986	12.2399	10.7247	12.2371	15.4202	12.7443	15.3523
MEXAM1_RS04195	TetR/AcrR family transcriptional regulator	8.62402	7.97094	8.07665	7.50832	8.45462	9.09094	10.8626	9.91144	11.0895
MEXAM1_RS04200	DUF4188 domain-containing protein	48.7721	41.6663	39.3575	44.488	68.9403	62.3789	56.0179	44.7562	44.7746
MEXAM1_RS04205	DUF2155 domain-containing protein	14.8074	13.1728	15.6168	13.8192	13.9176	15.6052	30.436	29.3541	32.3451
MEXAM1_RS04210	NADH-quinone oxidoreductase	88.9549	90.4037	99.1924	83.5372	76.7737	80.8531	118.756	125.861	125.131
MEXAM1_RS04215	ribonucleoside-diphosphate reductase, adenosylcobalamin-dependent	9.61987	12.4684	13.5615	11.5251	17.4317	14.0035	31.5922	29.1717	35.7037
MEXAM1_RS04225	hypothetical protein	2.75973	7.41612	11.1462	4.32013	6.55721	9.63702	13.5443	12.2396	9.94351
MEXAM1_RS04230	IS256 family transposase	2.98373	3.20813	3.39494	3.56506	3.34035	3.45914	1.33084	1.48503	1.48502
MEXAM1_RS04235	guanylate cyclase	0.374577	0.639058	0.568664	0.754862	0.677591	0.680249	1.00761	1.00645	1.14883
MEXAM1_RS04245	IS3 family transposase	6.0325	6.54439	4.06662	3.48933	2.78199	5.99509	5.28629	6.39877	7.18048
MEXAM1_RS04250	hypothetical protein	1.10725	1.17952	0.990996	1.39204	1.66308	1.20236	3.87333	3.0958	3.86186
MEXAM1_RS04255	hypothetical protein	4.14209	4.16942	5.26616	2.95373	5.48519	4.67281	9.20409	7.07218	8.55777
MEXAM1_RS04260	metallophosphoesterase	3.13448	2.76232	2.76709	2.84126	2.76962	3.53897	3.52287	3.22453	3.69068
MEXAM1_RS04265	hypothetical protein	125.23	115.644	104.84	143.964	96.986	113.577	134.589	145.009	143.546
MEXAM1_RS04270	IS256 family transposase	2.98373	3.20813	3.39494	3.56506	3.34035	3.45914	1.33084	1.48503	1.48502
MEXAM1_RS04275	ferritin-like domain-containing protein	153.981	162.859	170.017	188.115	158.336	161.775	44.634	40.3102	46.8084
MEXAM1_RS04280	DUF2252 domain-containing protein	4.33387	3.37964	3.3033	3.61681	3.35734	4.16747	4.31421	3.68333	4.16548
MEXAM1_RS04285	formate/nitrite transporter family protein	1.88147	1.60279	1.72546	2.20602	1.58012	1.96464	2.70055	2.77965	3.67593
MEXAM1_RS04290	protein kinase	1.70608	1.99101	1.23171	1.47496	1.14434	1.38521	2.52212	1.98836	2.22547
MEXAM1_RS04295	IS3 family transposase	13.3737	11.4706	11.9703	12.7556	11.0748	11.7578	9.66975	10.11	10.0734
MEXAM1_RS04305	IS256 family transposase ISMex14	1.51654	1.39626	1.3553	1.47942	1.04486	0.932418	1.91674	2.01882	2.00466
MEXAM1_RS04310	hypothetical protein	0.990489	1.20176	1.09598	1.31546	1.11023	1.29166	1.57011	1.05771	1.64619
MEXAM1_RS04315	multidrug transporter	2.99661	2.31659	3.1535	2.54766	2.03277	1.9954	2.98923	3.35484	3.23761
MEXAM1_RS04320	hypothetical protein	2.3658	3.64364	2.10375	2.324	2.17294	4.73615	3.6873	4.01651	5.90404
MEXAM1_RS04325	IS256 family transposase	2.98373	3.20813	3.39494	3.56506	3.34035	3.45914	1.33084	1.48503	1.48502
MEXAM1_RS04335	hypothetical protein	1.70887	1.4489	2.47895	2.83623	1.61131	0.899497	2.45726	1.84975	1.4189
MEXAM1_RS04340	polyphosphate kinase 2	2.72987	2.65778	2.40346	2.66521	2.02139	1.95478	3.41448	2.59588	3.13474
MEXAM1_RS04345	hydrophobe/amphiphile efflux-1 family RND transporter	1.37837	1.12387	1.14512	1.42411	1.26065	1.08231	1.42628	1.66727	1.62877
MEXAM1_RS04350	MexE family multidrug efflux RND transporter periplasmic adaptor subunit	2.17898	1.76761	1.99377	2.7832	2.30495	2.2627	1.94447	2.25112	2.45043
MEXAM1_RS04355	membrane protein	5.12617	4.73016	8.32405	8.55162	9.16411	6.57781	6.53363	6.36601	4.87862
MEXAM1_RS04360	hypothetical protein	16.6737	14.9788	20.2845	19.1261	21.4661	27.2826	13.135	14.3801	13.261
MEXAM1_RS04365	heavy metal translocating P-type ATPase	2.20885	2.09537	1.93089	1.54123	2.05866	2.25181	1.93602	2.15571	2.06678
MEXAM1_RS04370	transcriptional regulator	5.1105	8.10764	5.43086	8.33722	4.14771	8.3503	5.73779	10.8147	10.6608
MEXAM1_RS04375	ABC transporter ATP-binding protein	0.7586	0.377218	0.905831	0.636122	1.0949	0.977203	0.771091	1.45688	0.893531
MEXAM1_RS04380	nitrate ABC transporter, permease protein	0.627157	0.46748	0.60391	0.472719	0.150488	0.302253	0.506352	0.453821	0.875222
MEXAM1_RS04385	nitrate ABC transporter substrate-binding protein	0.871576	0.354124	0.641899	0.292868	1.04198	0.7644	1.39916	0.860968	1.04901
MEXAM1_RS04390	rubredoxin	0.212695	0.399237	0.610854	0.471662	0.657107	0.577202	0.396664	0.487024	0.379489
MEXAM1_RS04395	acyl-CoA dehydrogenase	1.02714	0.709233	0.485926	0.640582	0.660412	0.615657	0.596473	0.455886	0.691009
MEXAM1_RS04400	OsmC family peroxiredoxin	0.4613	0.652984	0.839646	0.767916	1.02091	1.17225	0.99444	0.911518	1.26235
MEXAM1_RS04405	sigma-54-dependent Fis family transcriptional regulator	0.408546	0.668339	0.45168	0.446436	0.460805	0.561679	0.87902	0.753216	0.910901
MEXAM1_RS04410	GlxA family transcriptional regulator	1.44573	1.48934	1.99253	2.06145	2.31961	1.8632	2.50675	2.42718	1.97157
MEXAM1_RS04415	DJ-1/PfpI family protein	2.5447	2.59881	2.01141	2.8589	2.43327	1.46642	2.19226	1.70668	1.28899
MEXAM1_RS04420	cation/acetate symporter ActP	1.0493	1.16422	1.73996	1.27	1.55525	1.79875	1.48004	0.973792	1.29978
MEXAM1_RS04425	DUF485 domain-containing protein	6.71595	3.7526	4.7338	3.64196	2.72983	5.47943	3.74193	7.65658	6.14148
MEXAM1_RS04430	aliphatic nitrilase	0.751855	1.00756	0.592526	0.973484	1.29385	1.29901	1.2714	1.34966	0.838715
MEXAM1_RS04435	LysR family transcriptional regulator	4.28753	3.89713	2.04612	4.23957	3.77665	2.9649	5.33296	4.33409	4.36025
MEXAM1_RS04440	hypothetical protein	50.0938	50.9456	47.3938	64.8062	60.2593	43.6127	49.0061	44.2846	59.7498
MEXAM1_RS04445	DNA-directed RNA polymerase sigma-70 factor	12.5199	13.2539	14.9739	14.2945	12.361	12.5134	10.0113	10.0916	8.49218
MEXAM1_RS04450	hypothetical protein	37.22	24.0203	35.2307	38.8814	37.5156	46.5694	58.5763	54.1979	62.2492
MEXAM1_RS04455	XRE family transcriptional regulator	17.9092	29.3954	18.9352	17.4814	25.9333	21.9177	26.1935	27.0925	32.9407
MEXAM1_RS04460	type I secretion system permease/ATPase	3.351	3.27663	3.36925	3.59626	3.30052	3.54961	4.34758	4.40852	4.73135
MEXAM1_RS04465	HlyD family type I secretion periplasmic adaptor subunit	2.70269	2.69044	3.30258	3.4264	2.29362	2.97736	3.02532	2.69444	2.86146
MEXAM1_RS04470	hypothetical protein	3.05823	3.29564	2.60597	2.83298	2.9113	2.63976	2.52482	2.49588	2.58953
MEXAM1_RS04475	cellulose synthase	4.45204	4.88374	5.25409	3.81253	3.10779	3.77476	2.39932	2.421	2.48603
MEXAM1_RS04480	hypothetical protein	4.58757	4.67843	5.33877	4.31997	4.13527	3.81368	2.53976	2.78947	2.2989
MEXAM1_RS04485	HlyD family secretion protein	15.1698	16.7166	16.7096	14.9657	12.2432	13.1226	7.47254	7.341	7.652
MEXAM1_RS04490	ABC transporter ATP-binding protein	3.52679	3.00368	2.58589	2.61491	2.7378	2.99216	2.04913	1.52174	2.56291
MEXAM1_RS04495	ABC transporter permease	0.555227	0.368143	0.544075	0.558771	1.12813	0.894239	1.10658	1.0658	1.0555
MEXAM1_RS04500	ABC transporter substrate-binding protein	0.442006	0.659596	1.09709	0.445064	1.17109	0.587888	1.1495	0.992291	0.862915
MEXAM1_RS04505	acyl-CoA dehydrogenase	1.64927	1.58243	1.82008	1.50545	1.54026	1.49649	1.8117	1.36836	1.99298
MEXAM1_RS04510	LLM class flavin-dependent oxidoreductase	2.06972	2.04365	2.52374	1.6454	2.0993	1.89691	2.03189	1.60386	1.74179
MEXAM1_RS04515	aliphatic sulfonate ABC transporter substrate-binding protein	2.93892	2.90336	3.67973	3.2252	3.91815	2.57982	2.636	2.69681	2.88229
MEXAM1_RS04520	cupin domain-containing protein	7.20767	7.75277	8.56648	6.71606	6.83007	4.8794	7.36758	9.39607	8.72909
MEXAM1_RS04525	NA	1.59325	3.90909	3.36769	1.5374	1.53317	4.52937	0	1.11363	10.0778
MEXAM1_RS04530	hypothetical protein	9.11408	10.2135	20.9801	17.6748	31.7724	17.1534	19.6683	8.74263	17.0444
MEXAM1_RS04535	serine O-acetyltransferase	1.31923	1.85107	2.22059	2.26185	2.38376	1.12212	1.39229	0.673679	1.15513
MEXAM1_RS04540	cyclic nucleotide-binding domain-containing protein	1.57602	2.72404	3.16999	2.03701	3.39543	1.72387	1.88403	1.8783	2.6435
MEXAM1_RS04545	SufS family cysteine desulfurase	3.06532	3.4822	4.3691	3.04156	3.94815	3.55903	3.2041	2.92189	3.08821
MEXAM1_RS04550	NAD(P)/FAD-dependent oxidoreductase	4.88782	4.97817	4.75766	5.55704	3.84782	4.04747	3.68924	3.749	4.20283
MEXAM1_RS04555	porin family protein	37.8187	30.6005	38.3476	31.9875	38.3017	34.751	108.414	115.275	107.757
MEXAM1_RS04560	3',5'-cyclic-nucleotide phosphodiesterase	135.784	121.024	160.322	130.144	145.007	128.908	90.6942	75.5234	83.4945
MEXAM1_RS04565	DUF1236 domain-containing protein	59.0515	60.8726	65.1506	66.5068	48.2802	55.1968	34.3166	26.8439	32.7026
MEXAM1_RS04570	hypothetical protein	152.952	135.515	124.605	159.889	160.983	157.018	241.876	268.385	273.221
MEXAM1_RS04575	cold-shock protein	20811.3	20938.7	22770.1	20367.1	21211.7	20166.2	6816.37	6509.77	7042.87
MEXAM1_RS04580	hypothetical protein	531.686	471.143	499.564	638.888	504.202	530.492	361.063	403.102	329.534
MEXAM1_RS04585	hypothetical protein	196.046	164.655	164.34	125.172	157.908	149.764	478.854	548.202	430.17
MEXAM1_RS04590	hypothetical protein	5.69322	4.90678	5.55262	4.87459	4.23078	4.56117	4.04401	3.82364	4.15006
MEXAM1_RS04595	DUF4198 domain-containing protein	26.992	21.2601	20.0475	22.2685	18.5704	21.514	28.2318	27.8187	28.5437
MEXAM1_RS04600	PAS domain S-box protein	47.844	43.7192	41.1111	42.9285	33.8338	35.4621	37.7726	37.7434	36.1241
MEXAM1_RS04605	DUF1269 domain-containing protein	2014.21	1892.3	1811.31	1758.02	1448.65	1497.75	1921.39	2041.93	1764.49
MEXAM1_RS04610	oleate hydratase	280.966	255.213	237.216	235.843	186.974	199.904	240.405	264.289	226.197
MEXAM1_RS04615	DUF2778 domain-containing protein	30.7208	27.3839	25.2169	24.7173	20.6752	22.8399	39.4061	39.4939	36.3522
MEXAM1_RS04620	urease accessory protein UreE	3.24944	3.48495	4.46383	5.37949	3.25403	6.53929	7.47501	6.21661	6.63876
MEXAM1_RS04625	urease accessory protein UreF	0.859932	1.09751	0.825561	1.72428	1.64304	1.2378	1.38918	0.863505	1.76192
MEXAM1_RS04630	urease subunit beta	2.2848	1.76756	1.70984	1.45823	1.29056	1.69515	2.23684	1.89392	1.93419
MEXAM1_RS04635	urease subunit alpha	4.19316	3.87533	3.93978	3.84877	3.99456	3.12204	4.99692	5.32841	5.29507
MEXAM1_RS04640	urease accessory protein UreG	2.1124	1.79658	1.67206	2.11603	2.46258	0.899508	1.26407	1.37538	1.22452
MEXAM1_RS04645	urease accessory protein UreD	1.60193	1.7993	2.00448	1.39104	1.81881	2.45858	2.61264	2.78769	3.30531
MEXAM1_RS04650	urea ABC transporter substrate-binding protein	1.11691	1.86587	1.18185	1.07856	1.48173	1.35231	2.23666	2.93409	3.28715
MEXAM1_RS04655	DUF1624 domain-containing protein	0.250137	0.554704	0.441739	0.403163	0.43416	0.435876	0.753646	0.897021	0.483602
MEXAM1_RS04660	TonB-dependent siderophore receptor	0.614079	0.907545	0.653511	0.69148	0.709057	0.711688	0.999245	1.29371	0.842273
MEXAM1_RS04665	DUF2778 domain-containing protein	3.14033	3.72489	3.30397	3.8063	2.98128	2.56546	5.45584	4.99584	4.19582
MEXAM1_RS04670	nuclear transport factor 2 family protein	87.475	79.641	78.9784	82.5264	86.7529	80.528	33.2693	21.7153	34.0538
MEXAM1_RS04675	OsmC family peroxiredoxin	41.0797	45.9068	34.5623	43.8277	38.204	35.2271	18.1364	16.8044	15.9849
MEXAM1_RS04680	PAS sensor domain-containing protein	7.92227	8.86906	7.31508	7.62712	8.29134	7.45485	9.04657	6.71967	7.14369
MEXAM1_RS04685	formyl-CoA transferase	3.55113	4.17027	3.76835	4.32196	3.55992	3.61854	2.01799	2.74207	2.70884
MEXAM1_RS04690	hypothetical protein	2.16752	1.67722	1.62292	2.17483	2.07363	1.51472	1.13166	1.86543	1.541
MEXAM1_RS04695	oxalyl-CoA decarboxylase	1.47396	1.4155	1.32449	1.64208	1.51488	1.49079	1.36537	1.1384	1.59736
MEXAM1_RS04700	DUF1929 domain-containing protein	1.24168	0.828974	1.09954	1.11689	1.61816	1.51441	1.79694	1.78208	1.92882
MEXAM1_RS04705	oxalate/formate MFS antiporter	1.63004	1.72011	1.51619	1.81594	1.73927	0.997731	1.63074	1.47349	2.10472
MEXAM1_RS04710	oxalate/formate MFS antiporter	2.77217	2.13982	2.23551	3.06004	2.71822	2.34507	1.83066	1.66953	1.70112
MEXAM1_RS04715	CBS domain-containing protein	8.29473	6.18885	6.06896	7.73969	5.93113	7.33526	10.0002	12.4419	8.38999
MEXAM1_RS04720	hypothetical protein	333.866	293.627	352.653	288.931	239.422	256.953	214.57	199.31	207.714
MEXAM1_RS04725	hypothetical protein	2.4106	2.84193	2.03169	2.66429	3.52661	2.31345	2.14033	2.12646	2.11112
MEXAM1_RS04730	hypothetical protein	522.166	444.024	454.841	499.141	667.85	526.902	925.446	903.226	900.269
MEXAM1_RS04735	formyl-CoA transferase	16.733	16.2444	16.7151	17.5796	16.0214	14.6647	10.0924	8.07155	8.81047
MEXAM1_RS04740	GntR family transcriptional regulator	35.2255	30.4266	37.129	35.9614	34.37	31.3478	58.0159	59.0755	58.5327
MEXAM1_RS04745	GTP-binding protein	19.5928	17.7726	19.9393	19.6753	20.6579	20.6353	22.3106	22.4513	19.8587
MEXAM1_RS04750	D-alanyl-D-alanine carboxypeptidase	19.4695	17.2425	16.7686	16.1149	16.6136	18.067	30.5099	29.0985	31.2085
MEXAM1_RS04755	7-carboxy-7-deazaguanine synthase	8.58085	9.22305	10.9698	10.6235	9.54583	9.0181	9.49969	7.77386	10.4819
MEXAM1_RS04760	hypothetical protein	9.41876	3.98049	7.2361	6.38717	6.71574	8.61182	5.70398	4.722	4.25937
MEXAM1_RS04765	hypothetical protein	61.124	50.3308	44.0048	38.9305	41.3767	42.2079	31.486	23.2545	24.1083
MEXAM1_RS04770	FAD-binding monooxygenase	2.97844	2.89805	2.77477	2.71984	3.72677	3.47092	4.97408	5.00129	4.67121
MEXAM1_RS04775	6-carboxytetrahydropterin synthase QueD	24.1397	16.3624	26.6409	28.2622	25.2447	23.8236	38.4163	40.663	41.564
MEXAM1_RS04780	7-cyano-7-deazaguanine synthase	5.66736	7.27751	8.44104	4.82001	4.32085	6.00176	7.37821	6.50035	7.08226
MEXAM1_RS04785	PIG-L family deacetylase	19.638	19.7869	18.7605	17.044	16.1648	20.0661	24.1079	25.3943	21.2659
MEXAM1_RS04790	glycosyl transferase	6.60693	5.8905	6.59561	5.17366	5.16293	7.55493	13.0115	11.6685	10.5205
MEXAM1_RS04795	hypothetical protein	197.947	261.548	248.272	204.469	275.177	195.828	62.1699	40.6077	63.0461
MEXAM1_RS04800	hypothetical protein	1146	1213.86	1354.54	1300.31	1133.32	1071.44	341.036	445.68	371.576
MEXAM1_RS04805	glycosyl transferase	28.2953	30.5756	32.4794	30.5199	28.1956	29.2023	16.1575	16.0253	16.0634
MEXAM1_RS04810	glycosyl transferase	8.86345	7.69904	7.53077	8.09342	8.00937	7.88163	19.6689	20.0898	19.571
MEXAM1_RS04815	glycosyltransferase family 4 protein	23.012	20.7422	18.8745	18.3838	26.1232	19.9879	51.4489	47.4657	50.6516
MEXAM1_RS04820	HPr family phosphocarrier protein	122.084	113.03	112.841	108.384	96.9527	117.426	139.346	126.171	117.696
MEXAM1_RS04825	PTS fructose transporter subunit IIA	122.437	110.953	94.0566	118.918	104.923	119.787	169.423	168.076	152.796
MEXAM1_RS04830	HPr kinase	16.6024	14.8286	17.9006	16.0315	16.1894	17.5925	12.1859	12.1237	11.4873
MEXAM1_RS04835	HAMP domain-containing protein	14.7195	15.7876	15.1354	15.1736	12.5147	13.5969	7.51929	9.74899	8.98994
MEXAM1_RS04840	DNA-binding response regulator	77.2467	77.1318	77.8072	73.5964	63.5779	74.2134	47.2173	56.2047	48.3945
MEXAM1_RS04845	DUF2470 domain-containing protein	25.2561	26.7335	24.6375	23.4045	21.4053	22.6779	22.35	23.6235	23.4238
MEXAM1_RS04850	elongation factor 4	9.18836	9.46323	9.34352	8.34439	9.77849	9.03815	11.8184	11.3015	11.3651
MEXAM1_RS04855	efflux RND transporter periplasmic adaptor subunit	5.79352	5.56988	5.53413	5.93075	5.41274	5.34485	8.31164	8.13535	7.89702
MEXAM1_RS04860	CusA/CzcA family heavy metal efflux RND transporter	2.3664	2.0483	2.09699	1.73715	1.68273	2.05733	3.33686	3.30267	3.08178
MEXAM1_RS04865	LacI family transcriptional regulator	18.4519	24.4864	9.77597	13.4602	14.8191	6.6712	11.0435	9.37692	13.7495
MEXAM1_RS04870	hypothetical protein	7.3436	7.60032	5.99798	4.34605	5.18421	5.09654	13.8349	12.4471	14.6341
MEXAM1_RS04875	glycosyl transferase	9.18713	7.49633	7.02656	5.11337	5.00352	4.90981	13.3748	11.5488	13.2573
MEXAM1_RS04880	flagellar protein	3.59651	4.02122	4.72133	3.3296	4.45321	3.05894	24.3004	20.2436	18.7918
MEXAM1_RS04885	flagellar protein	13.0252	19.5672	17.1685	18.9493	32.11	20.9419	116.377	100.8	117.883
MEXAM1_RS04890	flagellar protein FlbT	16.1736	24.4843	20.7402	19.5747	24.6402	18.7788	21.8656	21.6189	22.7321
MEXAM1_RS04895	DUF3606 domain-containing protein	422.34	419.99	392.381	431.223	377.637	434.127	181.89	188.625	209.598
MEXAM1_RS04900	acyltransferase	1.97034	1.24961	2.00736	1.6794	2.58176	2.24964	6.52367	5.03747	6.91254
MEXAM1_RS04905	HD domain-containing protein	0.934368	1.76785	1.92997	1.59725	0.98083	1.37847	3.8463	3.42812	3.47289
MEXAM1_RS04910	restriction endonuclease	34.6009	27.2678	27.7697	33.3321	24.2457	25.7118	14.2576	17.7132	18.6211
MEXAM1_RS04915	TIGR01244 family phosphatase	303.975	269.981	265.38	209.269	181.823	191.795	436.273	541.024	359.822
MEXAM1_RS04920	type I methionyl aminopeptidase	38.3757	35.5713	33.6762	23.7428	26.9682	26.1115	54.0345	54.7054	50.161
MEXAM1_RS04925	membrane protein	69.7418	75.9599	84.2811	58.5617	60.4175	52.1256	25.5663	26.7908	23.7534
MEXAM1_RS04930	transporter	10.6319	10.1165	9.59302	8.59486	8.68333	7.52047	5.12691	4.75527	4.63737
MEXAM1_RS04935	3-keto-5-aminohexanoate cleavage protein	3.27072	3.8882	2.76301	2.21729	2.33716	3.22706	2.72932	1.54001	2.26434
MEXAM1_RS04940	sigma-54-dependent Fis family transcriptional regulator	0.959775	1.4954	0.78367	0.967496	1.04761	0.647183	1.67616	1.16423	0.930639
MEXAM1_RS04945	sensor histidine kinase	2.68609	2.00351	1.53265	2.16857	1.86056	2.14218	2.41292	2.6387	2.122
MEXAM1_RS04950	ABC transporter ATP-binding protein	1.82906	1.68317	1.04726	1.61831	0.983973	1.27037	3.04512	3.48839	3.26666
MEXAM1_RS04955	ABC transporter permease	2.02184	2.20439	1.77956	1.54396	1.39666	1.63638	3.19234	2.81121	3.49148
MEXAM1_RS04960	myristoyl transferase	2.02293	1.72442	1.81166	1.71753	1.64234	1.83226	3.12972	3.36903	3.76223
MEXAM1_RS04965	septum formation inhibitor MinC	14.016	15.3869	14.8639	14.8414	13.2279	15.3298	18.8741	17.1654	18.4294
MEXAM1_RS04970	DUF2254 domain-containing protein	1.49496	1.54587	2.30119	2.32829	2.31698	2.76492	2.72963	1.94662	2.59343
MEXAM1_RS04975	translational GTPase TypA	33.3095	35.3014	35.5184	36.8287	32.398	34.8205	46.2233	48.5153	49.0257
MEXAM1_RS04980	HAMP domain-containing protein	1.92326	1.55958	1.70141	1.97262	3.28597	2.1782	2.43678	2.58342	3.07296
MEXAM1_RS04985	septum formation inhibitor MinC	2.96818	4.78066	3.95508	3.50774	4.35571	4.17165	25.116	20.1961	21.5607
MEXAM1_RS04990	septum site-determining protein MinD	11.1977	16.4996	18.7029	11.4148	16.936	13.7012	127.178	105.211	99.049
MEXAM1_RS04995	cell division topological specificity factor	59.146	87.1114	88.5573	42.4892	85.3018	52.8409	612.644	588.202	479.876
MEXAM1_RS05000	cytochrome P450	2.98139	3.83327	3.33895	3.2938	3.90462	2.9299	4.51125	3.68027	4.58435
MEXAM1_RS05005	SMP-30/gluconolactonase/LRE family protein	5.38449	5.68942	4.66467	7.65228	5.24278	4.84891	6.54286	6.27302	5.66286
MEXAM1_RS05010	glycoside hydrolase family 15 protein	1.98757	1.50007	1.52947	2.23825	1.86745	1.90244	1.48733	1.68298	1.47692
MEXAM1_RS05015	LLM class F420-dependent oxidoreductase	2.46311	2.76251	2.3573	3.326	1.93294	2.00344	1.81385	2.0083	1.63956
MEXAM1_RS05020	porin	3.48278	3.61981	2.97366	3.51142	2.52304	3.76078	3.43479	2.63129	2.53847
MEXAM1_RS05025	DEAD/DEAH box helicase	11.9156	13.6095	13.3653	13.2751	12.3377	11.2344	5.36366	4.979	5.75593
MEXAM1_RS05030	ammonium transporter	4.96692	3.82185	4.79516	3.55363	3.60902	3.73855	2.12305	3.81253	2.20355
MEXAM1_RS05035	IS3 family transposase	13.3737	11.4706	11.9703	12.7556	11.0748	11.7578	9.66975	10.11	10.0734
MEXAM1_RS05045	ammonium transporter	150.293	119.317	117.922	145.482	94.7206	110.736	52.5572	52.7719	43.79
MEXAM1_RS05050	urea transporter	69.5679	61.0315	58.2036	68.6528	46.9383	55.3263	29.9134	28.1983	25.5863
MEXAM1_RS05055	urease accessory protein UreD	52.0848	48.411	44.7645	51.2405	34.5978	41.3757	25.6248	23.3228	19.9024
MEXAM1_RS05060	Urease accessory protein UreG 2	233.745	186.721	193.909	220.163	162.209	180.346	102.531	104.815	92.0937
MEXAM1_RS05065	urease accessory protein UreF	84.7033	67.7711	63.0965	72.0964	61.4087	63.7465	44.8398	43.7248	38.3617
MEXAM1_RS05070	urease accessory protein UreE	232.201	216.438	201.238	239.785	186.649	200.239	141.361	142.243	125.081
MEXAM1_RS05075	fluoride efflux transporter CrcB	43.1709	41.2599	28.4841	48.9642	32.1758	36.2097	31.5371	30.6428	29.4639
MEXAM1_RS05080	CrcB family protein	215.164	216.469	196.059	223.059	178.082	199.314	168.115	179.018	146.544
MEXAM1_RS05085	urease subunit alpha	469.439	435.828	422.372	505.552	396.706	429.391	330.743	335.646	292.999
MEXAM1_RS05090	urease subunit beta	1141.58	1123.02	1016.32	1322.37	1060.7	1141.15	793.796	824.397	724.245
MEXAM1_RS05095	urease subunit gamma	1787.16	1871.67	1580.97	2359.99	1713.3	1740.81	976.882	1125.8	1053.6
MEXAM1_RS05100	TonB-dependent receptor	4.84548	5.2561	5.22548	6.28886	6.463	6.439	7.16206	7.6351	7.6961
MEXAM1_RS05105	DUF4198 domain-containing protein	50.0457	50.9425	47.6919	59.0933	62.6982	59.9253	38.5858	41.099	41.349
MEXAM1_RS05110	hypothetical protein	54.2493	46.295	42.1045	50.6684	67.6421	62.0069	75.3345	85.8142	76.4478
MEXAM1_RS05115	esterase	16.7024	13.1523	11.4878	11.0562	11.9884	12.7861	15.222	13.4296	15.627
MEXAM1_RS05120	transglutaminase	1.89874	2.41483	1.03289	0.756329	1.61131	1.79899	2.32075	4.55323	2.9797
MEXAM1_RS05130	IS3 family transposase	13.3737	11.4706	11.9703	12.7556	11.0748	11.7578	9.66975	10.11	10.0734
MEXAM1_RS05135	hypothetical protein	10.313	10.9557	12.5182	17.2756	19.6783	15.4241	12.3288	28.3714	14.8862
MEXAM1_RS05160	IS1380 family transposase	0.901773	0.877389	0.821376	0.98873	0.992862	0.879154	1.03643	1.06024	1.21139
MEXAM1_RS05170	hypothetical protein	5.97895	4.85863	6.31476	11.8556	5.82279	5.72359	15.8049	9.45418	32.6065
MEXAM1_RS05175	tRNA-Arg	45.8567	52.1479	26.0142	45.144	20.1159	38.5906	70.8145	44.7587	48.1935
MEXAM1_RS05180	IS256 family transposase	2.98373	3.20813	3.39494	3.56506	3.34035	3.45914	1.33084	1.48503	1.48502
MEXAM1_RS05185	hypothetical protein	11.1909	8.79418	7.30918	11.8551	7.28265	6.10034	13.2941	13.5306	11.4816
MEXAM1_RS05190	DUF72 domain-containing protein	2.46994	3.19331	3.01598	2.2041	3.50455	3.25575	3.74276	2.99101	3.20146
MEXAM1_RS05195	hypothetical protein	3.74894	3.54133	4.99612	1.8366	1.71798	2.15901	4.0527	5.18602	5.63004
MEXAM1_RS05200	tRNA-Arg	12.1421	13.0505	6.09484	2.98046	4.4266	6.77477	20.082	11.7261	8.38916
MEXAM1_RS05205	IS3 family transposase	13.3737	11.4706	11.9703	12.7556	11.0748	11.7578	9.66975	10.11	10.0734
MEXAM1_RS05215	hypothetical protein	1.59081	7.97682	5.03966	1.55291	14.5875	3.64659	20.4564	21.8864	30.9791
MEXAM1_RS05220	LysR family transcriptional regulator	1.26358	1.58711	1.75867	2.00706	2.04661	1.60547	3.34036	3.02049	2.96873
MEXAM1_RS05225	short-chain dehydrogenase	7.14636	8.24948	9.35352	10.6089	7.68048	7.62011	6.32491	4.06269	6.56203
MEXAM1_RS05230	methyl-accepting chemotaxis protein	1.36975	2.17528	1.05678	1.73541	2.0025	2.25747	3.03842	2.43087	3.29054
MEXAM1_RS05240	IS3 family transposase	13.3737	11.4706	11.9703	12.7556	11.0748	11.7578	9.66975	10.11	10.0734
MEXAM1_RS05245	tripartite tricarboxylate transporter TctB family protein	12.0304	13.4563	14.0489	14.6252	18.1859	14.2084	19.7557	19.954	22.7433
MEXAM1_RS05250	tripartite tricarboxylate transporter permease	3.049	2.3199	2.39552	2.1116	2.34294	2.53009	2.81914	3.27981	3.13996
MEXAM1_RS05255	hypothetical protein	5.18462	6.76553	6.27854	6.05397	6.4044	5.6267	5.92451	6.22465	7.8569
MEXAM1_RS05260	IS1380 family transposase	0.901773	0.877389	0.821376	0.98873	0.992862	0.879154	1.03643	1.06024	1.21139
MEXAM1_RS05265	short-chain dehydrogenase	4.92157	5.37965	4.87255	5.10952	4.72099	4.89922	7.24111	10.1019	7.99864
MEXAM1_RS05280	phosphoglyceromutase	5.60139	6.89195	6.26845	6.08763	6.59117	6.39258	6.07638	6.7257	4.88561
MEXAM1_RS05285	hypothetical protein	48.0631	52.4596	48.672	61.557	53.9763	40.1213	24.8785	29.4966	25.5494
MEXAM1_RS05290	hypothetical protein	737.404	618.665	732.512	756.78	745.317	623.871	260.781	263.366	251.959
MEXAM1_RS05295	hypothetical protein	1149.22	1230.69	1094.64	1301.39	1176.67	1052.94	361.404	373.901	393.743
MEXAM1_RS05300	hypothetical protein	68.0975	61.644	63.3398	56.5517	49.2117	49.2255	29.6473	39.2958	34.0577
MEXAM1_RS05305	NAD(P)-dependent oxidoreductase	32.2641	33.4404	31.8081	34.6507	27.0345	30.9558	19.9973	21.9947	20.677
MEXAM1_RS05310	hypothetical protein	221.922	221.204	227.842	278.781	177.649	195.91	83.4999	111.36	93.7742
MEXAM1_RS05315	hypothetical protein	195.654	210.424	225.669	222.567	160.699	167.878	111.72	89.4291	108.218
MEXAM1_RS05320	alpha/beta hydrolase	8.65567	9.21949	7.54594	8.99355	8.10861	7.9335	5.79724	6.30317	6.22628
MEXAM1_RS05330	histidine kinase	3.05196	2.99515	3.06664	3.2126	3.2906	3.09525	5.26185	5.27601	5.22935
MEXAM1_RS05335	cytochrome P450	1.78096	1.99251	1.13699	1.87542	2.17899	1.72689	3.6335	3.53668	3.58914
MEXAM1_RS05340	bifunctional diguanylate cyclase/phosphodiesterase	1.98218	2.08894	1.07387	1.61827	2.14512	2.17354	2.43441	2.38325	2.42813
MEXAM1_RS05345	DUF1194 domain-containing protein	0.627157	0.400697	0.431365	0.787865	0.37622	1.81352	0.675136	0.964369	0.583481
MEXAM1_RS05350	FAD:protein FMN transferase	0.7586	0.377218	0.836151	0.508898	0.304138	0.793977	0.589658	0.910549	0.564335
MEXAM1_RS05355	4Fe-4S binding protein	1.45624	1.68599	1.20184	1.44511	1.31443	1.36729	1.53984	1.56319	1.46706
MEXAM1_RS05360	membrane protein	0.550525	0.328618	0.789516	0.0554344	0.318253	0.585797	1.50084	1.42369	1.63774
MEXAM1_RS05365	ABC transporter substrate-binding protein	0.850583	1.16897	0.678235	0.904647	1.32202	0.823785	3.05076	3.8265	2.91621
MEXAM1_RS05370	cytochrome c-550 PedF	2.15409	3.86585	2.32372	0.799228	2.25767	3.02581	18.9815	20.2095	13.6914
MEXAM1_RS05375	amino acid ABC transporter substrate-binding protein	1.34252	1.08031	0.985349	1.12471	0.859604	1.22286	3.69315	4.4742	3.71886
MEXAM1_RS05380	PQQ-dependent dehydrogenase, methanol/ethanol family, ExaF	3.62517	3.27663	4.11049	3.65774	3.09424	3.04675	9.65643	10.7498	8.42136
MEXAM1_RS05385	MFS transporter	1.40602	1.04202	1.26773	1.11939	1.2514	1.18442	2.22917	2.27302	2.09013
MEXAM1_RS05390	hypothetical protein	57.7771	28.2011	32.0394	37.309	42.3549	47.2546	41.5486	43.2721	51.7149
MEXAM1_RS05395	hypothetical protein	7.09444	5.579	5.66099	6.03498	4.82644	5.98268	9.02969	8.71355	9.04984
MEXAM1_RS05400	hypothetical protein	5.39111	3.21978	4.88711	6.01299	3.52841	4.24054	4.40757	3.03183	5.19284
MEXAM1_RS05405	hypothetical protein	10.7468	9.42821	12.5045	11.8139	10.84	14.5827	19.451	13.5893	15.0902
MEXAM1_RS05410	hypothetical protein	1.96793	2.55297	2.16225	3.48036	3.49914	3.78469	3.49797	2.58926	3.48926
MEXAM1_RS05415	hypothetical protein	1.7035	4.7692	3.01714	4.44652	2.59232	4.69704	3.27873	5.85795	3.41147
MEXAM1_RS05420	hypothetical protein	2.14596	1.82047	1.36348	3.03027	2.0272	2.03677	1.79978	2.27071	3.87398
MEXAM1_RS05425	peptidase M48	1.97456	2.21287	1.5023	2.34208	2.24648	2.63864	1.80533	2.5292	2.69572
MEXAM1_RS05430	hypothetical protein	84.3632	58.2952	88.3725	81.2573	81.2356	107.351	114.454	108.595	96.2102
MEXAM1_RS05435	cupin domain-containing protein	24.9647	28.9342	25.4725	26.7683	28.3163	26.4418	17.0485	13.519	17.2804
MEXAM1_RS05440	3-oxoacyl-ACP reductase	5.40224	8.24701	8.8017	7.76026	9.45362	7.88239	4.21216	3.38564	4.09226
MEXAM1_RS05445	LysR family transcriptional regulator	3.61487	4.20622	3.67552	3.56568	4.20973	4.4284	4.24008	3.71209	3.6725
MEXAM1_RS05450	3-keto-5-aminohexanoate cleavage protein	1.73354	1.74524	1.99438	1.3462	1.21001	2.58218	1.01791	1.71078	1.29027
MEXAM1_RS05455	universal stress protein	1313.28	1241.97	1213.88	1202.45	1051.17	1035.95	1287.56	1279.58	1224.02
MEXAM1_RS05460	cystathionine beta-lyase	1265.06	1266.77	1190.88	1199.92	1026.46	1060.58	1179.94	1158.39	1088.81
MEXAM1_RS05465	nitrogen fixation regulation protein fixK	138.962	138.446	137.132	125.273	118.537	122.591	137.993	140.241	137.532
MEXAM1_RS05470	ABC transporter	46.2973	48.6815	44.3831	49.1988	44.6991	41.2327	37.4743	32.7963	39.3302
MEXAM1_RS05475	ABC transporter	46.1293	47.7518	46.3475	49.8117	47.7459	44.451	47.1156	47.1559	52.7917
MEXAM1_RS05480	cytochrome bd oxidase subunit I	171.311	173.951	183.148	179.148	184.814	162.466	148.518	134.536	156.285
MEXAM1_RS05485	cytochrome d ubiquinol oxidase subunit II	186.396	197.315	204.586	200.909	204.6	176.863	160.218	141.966	161.829
MEXAM1_RS05495	DeoR/GlpR transcriptional regulator	80.6165	80.1529	80.8026	87.026	75.3524	74.0858	54.5629	49.0209	61.3992
MEXAM1_RS05500	amidase	2.31703	1.91853	2.40859	2.33705	2.50732	2.51688	1.81059	1.57982	1.74776
MEXAM1_RS05505	response regulator	1.35516	1.30194	1.52369	1.21872	1.49752	1.52364	5.72406	4.1241	5.34828
MEXAM1_RS05510	cellulose biosynthesis protein BcsS	1.23259	1.95971	1.80784	1.23836	2.60112	2.53309	6.31043	5.77461	8.01295
MEXAM1_RS05515	cellulose synthase catalytic subunit (UDP-forming)	4.61967	3.29935	3.66626	4.149	3.56507	3.79687	5.14467	5.59286	5.66405
MEXAM1_RS05520	hypothetical protein	2.40459	2.44796	2.47087	2.62273	1.58463	2.05823	2.13798	2.25489	2.42929
MEXAM1_RS05525	cellulase	3.3837	3.21996	2.97069	1.88012	3.09883	2.27011	3.7029	3.88118	4.22484
MEXAM1_RS05530	hypothetical protein	3.15182	2.47409	2.89706	2.64267	2.19013	2.2477	2.71586	2.89466	2.75727
MEXAM1_RS05535	hypothetical protein	7.43858	5.5683	6.93449	8.27811	6.46204	7.30652	7.54992	7.31079	7.73747
MEXAM1_RS05540	IS3 family transposase	13.3737	11.4706	11.9703	12.7556	11.0748	11.7578	9.66975	10.11	10.0734
MEXAM1_RS05550	tRNA-Met	15.7223	22.5974	13.6074	32.7888	28.1622	25.8784	37.5625	18.0724	36.391
MEXAM1_RS05555	5S ribosomal RNA	158.749	138.404	120.664	184.799	123.843	158.957	161.949	194.343	256.801
MEXAM1_RS05560	23S ribosomal RNA	23.7904	27.9146	45.4963	36.872	30.957	49.0992	15.3445	20.7297	13.0807
MEXAM1_RS05565	tRNA-Ala	23.4344	27.5977	13.7896	29.0434	18.1489	21.0397	20.0231	10.9245	20.4562
MEXAM1_RS05570	tRNA-Ile	18.0151	25.2048	16.409	27.5616	14.8858	24.5164	14.7787	15.5389	17.507
MEXAM1_RS05575	16S ribosomal RNA	9.89011	11.1701	22.0552	16.7523	13.8957	26.9124	7.07267	9.00185	5.8732
MEXAM1_RS05580	complex I NDUFA9 subunit family protein	29.7131	28.211	30.5238	33.7737	32.716	29.6872	24.0516	23.436	25.4536
MEXAM1_RS05585	alpha/beta hydrolase	10.6166	9.40828	10.9165	9.9761	11.5101	7.31903	5.79658	4.44605	5.68589
MEXAM1_RS05590	MFS transporter	2.35898	2.35448	2.32668	2.52797	2.17784	2.13786	2.23233	1.476	2.23932
MEXAM1_RS05595	primosomal protein N'	5.06953	5.92146	5.13431	6.78356	6.90073	6.53123	4.97279	5.40997	4.83243
MEXAM1_RS05600	STAS/SEC14 domain-containing protein	262.804	253.243	254.455	221.123	216.012	213.113	262.551	268.434	248.99
MEXAM1_RS05605	hypothetical protein	138.98	121.667	130.281	94.4438	88.4372	98.4382	145.83	161.946	127.284
MEXAM1_RS05610	hypothetical protein	63.6865	69.0137	62.3473	75.7204	48.7132	49.7539	33.9044	39.5599	26.3667
MEXAM1_RS05615	KR domain-containing protein	26.047	27.7961	31.6626	24.9321	21.5661	18.6607	14.2884	15.3359	13.2781
MEXAM1_RS05620	cysteine hydrolase	55.6005	63.94	54.2831	53.0896	43.5542	37.2568	21.8102	26.9302	23.9788
MEXAM1_RS05625	glutathione-dependent formaldehyde dehydrogenase	35.1193	40.2374	37.8239	28.2718	24.9883	23.5857	14.8217	15.644	15.4381
MEXAM1_RS05630	FUSC family protein	12.1439	10.5445	10.1831	10.215	9.10247	9.02037	2.78408	3.70449	4.9134
MEXAM1_RS05635	NAD(P)-dependent oxidoreductase	19.7764	25.1437	23.4437	22.5552	19.7198	18.9956	7.80584	8.41504	9.39703
MEXAM1_RS05640	KR domain-containing protein	14.8639	17.0185	17.0707	14.6452	13.4067	14.002	7.22882	5.99986	7.21719
MEXAM1_RS05645	hypothetical protein	42.7556	56.9769	72.296	36.6281	63.874	37.2228	110.877	55.6801	101.337
MEXAM1_RS05650	ABC transporter	7.77732	7.94877	6.82757	6.33011	4.71198	6.77086	12.0174	11.17	11.3368
MEXAM1_RS05655	hypothetical protein	115.151	110.596	112.576	101.255	95.7927	101.414	98.3586	101.995	95.9023
MEXAM1_RS05660	tRNA-Met	15.7223	22.5974	13.6074	32.7888	28.1622	25.8784	37.5625	18.0724	36.391
MEXAM1_RS05665	5S ribosomal RNA	158.749	138.404	120.664	184.799	123.843	158.957	161.949	194.343	256.801
MEXAM1_RS05670	23S ribosomal RNA	23.7904	27.9146	45.4963	36.872	30.957	49.0992	15.3445	20.7297	13.0807
MEXAM1_RS05675	tRNA-Ala	23.4344	27.5977	13.7896	29.0434	18.1489	21.0397	20.0231	10.9245	20.4562
MEXAM1_RS05680	tRNA-Ile	18.0151	25.2048	16.409	27.5616	14.8858	24.5164	14.7787	15.5389	17.507
MEXAM1_RS05685	16S ribosomal RNA	9.89011	11.1701	22.0552	16.7523	13.8957	26.9124	7.07267	9.00185	5.8732
MEXAM1_RS05690	IS3 family transposase	13.3737	11.4706	11.9703	12.7556	11.0748	11.7578	9.66975	10.11	10.0734
MEXAM1_RS05700	hypothetical protein	66.8197	54.7512	57.3848	74.9958	74.6529	59.179	72.7263	75.4183	65.382
MEXAM1_RS05705	transcriptional regulator	24.4168	27.1844	24.7406	32.7931	32.1448	42.2734	16.8035	13.5183	17.4838
MEXAM1_RS05710	two-component sensor histidine kinase	6.92136	7.30758	6.78474	8.15339	7.18253	7.33624	5.9886	6.13022	5.27419
MEXAM1_RS05715	DNA-binding response regulator	9.3132	9.25885	8.61329	9.55838	9.64024	8.28501	8.21797	9.92943	8.36138
MEXAM1_RS05720	protein-disulfide reductase DsbD	1.20725	1.61187	1.33514	1.6553	1.79652	1.44265	1.84259	1.19182	1.63327
MEXAM1_RS05725	DSBA oxidoreductase	1.44119	1.53212	1.05282	1.44348	1.03062	1.38036	1.1213	0.792508	1.34291
MEXAM1_RS05730	L,D-transpeptidase	8.64767	7.43294	8.5831	7.13965	7.78286	6.69925	5.59653	5.92016	5.74652
MEXAM1_RS05735	hypothetical protein	24.1688	25.483	25.012	25.0918	21.4421	22.7884	18.6393	20.9247	17.4111
MEXAM1_RS05740	hypothetical protein	9.26318	8.04833	9.42801	11.266	16.2846	15.8735	4.37833	7.29131	5.14607
MEXAM1_RS05745	membrane protein	2.09707	3.9418	6.81059	5.31587	3.92748	4.60447	2.01035	2.29884	2.09084
MEXAM1_RS05750	sulfite exporter TauE/SafE family protein	3.3046	3.51826	4.08935	3.23696	4.35822	4.77479	2.31246	2.69374	2.45991
MEXAM1_RS05755	MBL fold metallo-hydrolase	4.32965	4.40384	6.07661	5.40784	5.2355	5.72892	3.95873	2.72142	3.27356
MEXAM1_RS05760	sulfurtransferase	20.9903	32.7286	30.0887	34.3088	30.9192	28.2709	14.5923	15.5117	11.393
MEXAM1_RS05765	MFS transporter	9.74345	9.18247	9.22142	9.30377	11.1915	9.84219	11.4157	10.5702	11.177
MEXAM1_RS05770	arsenical efflux pump membrane protein ArsB	1.0591	0.828266	1.07222	1.24531	1.3204	1.28278	1.10789	1.23211	1.27951
MEXAM1_RS05775	arsenate reductase (glutaredoxin)	2.91129	3.35347	2.85697	3.40601	1.9739	4.96047	2.47471	3.84819	3.76059
MEXAM1_RS05780	arsenate reductase ArsC	2.00578	2.12826	2.18762	2.33474	2.68952	1.58941	2.28265	1.61707	2.49634
MEXAM1_RS05785	transcriptional regulator	2.82585	2.03408	0.861099	1.98139	2.96414	1.86287	1.74259	2.21585	1.51086
MEXAM1_RS05790	arsenical resistance protein ArsH	1.01231	0.94021	2.52824	1.201	1.23384	1.23919	2.17987	1.4713	1.30199
MEXAM1_RS05795	hypothetical protein	9.75994	8.94619	8.11574	7.44391	9.59671	7.04205	5.21564	5.13717	4.79669
MEXAM1_RS05800	voltage-gated chloride channel protein	3.42589	3.8862	3.69607	4.14463	4.20402	4.61103	3.38234	4.55358	3.62525
MEXAM1_RS05805	phosphoglycerate mutase	3.57535	3.24327	2.48126	2.3873	3.29559	3.99536	3.93681	4.01795	4.08615
MEXAM1_RS05810	phosphoglycerate mutase	13.5863	14.6961	11.3616	13.8464	13.1823	12.671	18.2291	19.1289	17.1441
MEXAM1_RS05815	putative sulfate exporter family transporter	3.32245	3.25127	2.7641	2.30356	3.46384	2.31845	3.24321	2.81654	4.25321
MEXAM1_RS05820	C4-dicarboxylate ABC transporter	6.96262	6.85521	6.554	6.7553	6.76193	5.69856	8.44713	8.74224	7.76635
MEXAM1_RS05825	hypothetical protein	138.831	181.272	158.998	171.877	202.69	192.168	128.016	119.465	129.801
MEXAM1_RS05830	sulfite dehydrogenase (cytochrome) subunit SorA apoprotein	20.9985	23.4515	21.9796	23.5932	22.1774	22.8613	16.457	14.267	14.8376
MEXAM1_RS05835	cytochrome c	51.4759	56.8251	57.9113	60.4805	60.6272	69.1939	45.9887	49.2368	42.7212
MEXAM1_RS05840	hypothetical protein	10.0102	12.8266	9.22957	11.5935	10.4198	11.1313	10.9768	6.2565	8.71123
MEXAM1_RS05845	molybdopterin oxidoreductase	9.55837	10.742	10.6662	13.2407	9.74136	9.78031	5.19258	4.52485	4.84876
MEXAM1_RS05850	DUF202 domain-containing protein	7.91055	12.0293	6.44091	7.40432	5.19658	4.18256	5.14951	2.6501	4.2317
MEXAM1_RS05855	LysR family transcriptional regulator	3.10162	4.48682	4.20984	3.33632	2.63357	4.80185	3.41623	2.23997	2.63007
MEXAM1_RS05860	SGNH/GDSL hydrolase family protein	3.07281	4.23909	3.54457	4.9285	4.14675	5.85783	4.35768	4.1755	3.21222
MEXAM1_RS05865	anti-sigma factor	7.93384	7.32622	8.81808	8.30572	7.12812	7.72175	6.83316	7.20301	6.15473
MEXAM1_RS05870	RNA polymerase sigma factor	13.4122	15.1706	21.0366	17.1121	11.8253	15.6152	9.5131	11.6207	9.2174
MEXAM1_RS05875	hypothetical protein	55.3804	63.8301	62.5329	54.265	50.3576	55.3764	40.9481	52.5093	37.8679
MEXAM1_RS05880	DUF305 domain-containing protein	13.1183	12.631	9.55663	9.42808	6.99713	12.356	5.20384	5.13905	3.72016
MEXAM1_RS05885	YncE family protein	4.47065	4.34573	5.15496	3.76293	4.65674	5.24015	3.42962	4.14007	3.43872
MEXAM1_RS05890	Na+/H+ antiporter NhaA	2.87671	2.12958	2.52346	2.26007	3.18586	3.07521	2.30616	2.72421	3.36509
MEXAM1_RS05895	SulP family inorganic anion transporter	1.31082	0.990793	1.40731	1.39737	1.37514	2.28859	1.8266	1.92648	2.50539
MEXAM1_RS05900	Crp/Fnr family transcriptional regulator	2.07136	3.06083	3.82701	3.49712	3.74845	3.86986	2.42653	2.54885	3.41162
MEXAM1_RS05905	pentapeptide repeat-containing protein	19.0614	16.9493	16.1618	16.4487	15.6216	16.093	15.9109	14.3043	12.127
MEXAM1_RS05910	thioredoxin	40.7811	42.6909	44.4315	35.5825	33.0703	32.646	35.4927	33.709	28.0319
MEXAM1_RS05915	cytochrome c biogenesis protein	13.4978	12.9984	10.2785	10.973	11.3107	11.0764	14.3579	12.771	11.4475
MEXAM1_RS05920	hypothetical protein	9.58439	9.2439	5.31461	10.6224	11.0803	10.9235	10.7375	9.78123	10.1651
MEXAM1_RS05925	hypothetical protein	13.384	12.2891	18.1763	9.3686	18.5455	7.27642	18.029	34.8297	22.6751
MEXAM1_RS05930	hypothetical protein	5.41969	4.46894	18.6622	4.00209	3.86138	8.94958	10.4183	9.86358	15.6245
MEXAM1_RS05935	hypothetical protein	47.6453	43.2128	43.4104	41.6875	59.6358	42.2727	45.7285	56.0499	54.1399
MEXAM1_RS05940	hypothetical protein	32.0612	28.9328	30.2024	28.6658	30.6418	27.3887	25.1091	22.622	21.5597
MEXAM1_RS05945	hypothetical protein	6.09395	6.83032	4.35018	4.66333	6.55862	5.34005	8.02578	3.15491	5.31672
MEXAM1_RS05950	hypothetical protein	11.472	7.68066	2.01959	20.6109	1.85455	10.9146	6.43893	6.44995	8.50317
MEXAM1_RS05955	hypothetical protein	2.48796	1.53102	2.20538	2.46926	0.848137	1.27821	2.4393	3.42603	2.19828
MEXAM1_RS05960	hypothetical protein	1.78484	1.18997	1.45193	1.94987	0.968404	1.19693	1.89352	1.57192	0.981861
MEXAM1_RS05965	NA	1.01734	0.852575	2.70376	2.98225	0.929031	1.86964	0.732704	0.803999	2.66847
MEXAM1_RS05970	hypothetical protein	2.40951	0.504891	3.1928	2.35335	4.40134	4.9812	3.03548	0.477992	2.2642
MEXAM1_RS05985	hypothetical protein	14.7091	13.7628	10.5735	15.3425	19.3013	14.7815	12.6147	12.0658	16.1014
MEXAM1_RS05990	metallophosphoesterase	1.9407	2.53627	1.79414	2.83415	3.68392	3.55892	1.93077	1.87787	2.33924
MEXAM1_RS05995	hypothetical protein	2.257	2.46926	1.75766	2.05253	2.76697	2.46884	1.93782	2.04038	2.38601
MEXAM1_RS06000	tRNA-Arg	6.55096	30.4196	26.0142	21.384	30.1738	34.0505	40.0256	17.7346	25.5721
MEXAM1_RS06005	glycosyl transferase family 1	5.69937	6.54572	6.45463	4.98358	5.46837	5.68412	11.2214	10.8552	10.1102
MEXAM1_RS06010	hypothetical protein	5.45628	5.13883	5.37623	5.05339	4.48395	3.87913	7.67627	7.46541	8.7614
MEXAM1_RS06015	anti-sigma factor	14.8349	15.5062	17.4793	15.0747	18.5556	15.8146	13.645	11.995	10.45
MEXAM1_RS06020	RNA polymerase sigma factor	15.0808	12.4343	8.72401	10.0467	9.96529	9.16602	10.4104	12.9031	11.252
MEXAM1_RS06025	amidase	72.103	63.456	68.8109	40.3482	54.9435	51.2146	139.184	117.476	116.544
MEXAM1_RS06030	hypothetical protein	11.64	10.0656	14.6818	13.7504	8.9701	10.6148	9.19195	9.82094	11.4671
MEXAM1_RS06035	DUF1775 domain-containing protein	12.3868	13.9428	14.2113	12.9162	11.8815	12.8343	8.33359	6.64386	7.12417
MEXAM1_RS06040	copper chaperone PCu(A)C	39.0365	32.7034	35.0122	35.9071	34.0581	31.9687	18.7058	16.7348	17.0369
MEXAM1_RS06045	SCO family protein	14.7911	17.731	17.8718	13.1841	16.1098	17.0749	7.94493	9.4666	7.37791
MEXAM1_RS06050	hypothetical protein	8.04657	6.75838	10.3854	8.31241	7.76759	8.59211	4.87826	10.3324	7.61478
MEXAM1_RS06055	TonB-dependent receptor	1.16599	0.995601	0.725851	1.37324	1.05849	1.0152	1.20192	1.03703	0.974577
MEXAM1_RS06060	peptidase C14	2.65508	2.71012	2.17081	2.21332	2.12226	1.99009	3.93229	3.59855	3.1524
MEXAM1_RS06065	carbohydrate porin	3.35782	3.79918	3.25226	2.77724	3.64532	3.80569	5.52024	5.47214	4.90757
MEXAM1_RS06070	GntR family transcriptional regulator	5.59974	5.32453	6.26267	7.04382	6.71074	8.00482	11.7466	12.9184	10.8811
MEXAM1_RS06075	C4-dicarboxylate ABC transporter	3.88503	4.17851	4.02011	2.94788	4.1431	4.44871	5.78919	6.57879	6.17975
MEXAM1_RS06080	TRAP transporter small permease	1.65367	1.32483	1.60256	2.44032	2.69932	3.73952	2.79323	1.77024	1.44896
MEXAM1_RS06085	TRAP transporter large permease	3.55667	3.46305	3.60542	3.03691	3.95938	4.38032	3.87169	3.32273	2.79954
MEXAM1_RS06090	hypothetical protein, NepR homolog	30.0738	44.005	52.0098	51.7189	73.2651	72.6597	134.899	127.215	189.556
MEXAM1_RS06095	hypothetical protein	592.538	528.413	550.379	540.991	445.097	541.07	637.079	633.372	626.343
MEXAM1_RS06100	cysteine synthase A	10.9551	12.9485	12.1456	10.7951	13.1737	12.6102	16.676	16.1702	15.3912
MEXAM1_RS06105	serine protease	22.4686	23.5101	20.381	24.8582	24.0005	22.3404	22.1617	19.7638	20.2255
MEXAM1_RS06110	EamA-like transporter family protein	3.54853	3.00095	3.58416	2.11142	1.77127	3.33712	0.510274	2.15662	1.76871
MEXAM1_RS06115	alpha-2-macroglobulin family protein	10.5867	10.7538	12.5911	9.36888	9.3859	9.63196	8.52803	8.55929	7.95614
MEXAM1_RS06120	penicillin-binding protein 1C	1.34351	1.67392	1.30702	1.6214	1.73833	1.83661	0.711327	1.0753	0.877368
MEXAM1_RS06125	quaternary ammonium compound-resistance protein SugE	17.5467	19.1381	18.6144	12.5862	25.0944	18.8052	25.7084	24.1176	16.7072
MEXAM1_RS06130	XRE family transcriptional regulator	3.69473	2.50307	3.32472	2.69927	3.22094	2.99216	3.67637	2.9826	3.7506
MEXAM1_RS06135	class GN sortase	1.8597	2.42478	1.90121	3.35173	2.599	3.79743	3.65091	3.73121	3.51245
MEXAM1_RS06140	marine proteobacterial sortase target protein	3.41416	4.18202	3.20543	3.09024	7.45654	4.82926	10.6371	6.78357	10.3736
MEXAM1_RS06145	histidine phosphatase family protein	13.708	15.9033	15.5696	15.1318	17.3241	15.0743	9.38668	9.60448	8.31139
MEXAM1_RS06150	hypothetical protein	14.0243	13.9826	18.6758	12.7248	14.2496	13.8502	12.7567	13.9094	13.163
MEXAM1_RS06155	nickel transporter	7.19668	6.70259	6.80113	6.99988	3.37656	4.20856	10.5872	9.74771	9.44691
MEXAM1_RS06160	DUF1007 domain-containing protein	9.41773	8.5654	9.73831	7.37942	7.34153	8.82854	16.0108	14.5495	13.8725
MEXAM1_RS06165	cytochrome c-type biogenesis protein CcmH	23.5097	21.0188	25.012	20.9462	19.1742	17.1948	11.847	14.7801	9.85533
MEXAM1_RS06170	heme lyase CcmF/NrfE family subunit	27.0712	23.9677	24.9709	24.4798	22.9676	24.2815	13.9744	12.6368	13.0704
MEXAM1_RS06175	cytochrome c maturation protein CcmE	52.6744	48.8873	53.7241	50.447	51.5888	43.5811	29.9817	33.4418	30.9016
MEXAM1_RS06180	c-type cytochrome biogenesis protein CcmI	4.94531	5.07674	5.58182	5.37173	5.75012	5.60424	4.71249	4.96162	4.52362
MEXAM1_RS06185	ATP-binding protein	4.82839	6.21393	4.63541	5.62625	4.74026	6.33193	3.37802	2.74446	3.23611
MEXAM1_RS06195	DNA-binding response regulator	32.2584	31.6828	33.6091	32.2307	33.6056	28.4591	32.0215	33.6061	33.3908
MEXAM1_RS06200	hypothetical protein	31.8739	28.1548	27.9722	31.1817	27.7756	29.2764	30.161	24.6201	27.8614
MEXAM1_RS06205	NA	1.23764	1.02598	0	2.42997	5.83465	0	1.7443	4.62367	2.6958
MEXAM1_RS06210	hypothetical protein	6.07593	1.45811	4.16418	5.96099	3.58105	5.20058	4.37628	5.47023	7.15681
MEXAM1_RS06215	hypothetical protein	1.97097	1.1171	2.58877	1.44644	2.0011	3.14091	1.51032	1.5468	1.17598
MEXAM1_RS06220	lysozyme	2.21776	1.38159	0.807778	2.51168	1.82463	1.41016	1.59343	1.96828	1.32377
MEXAM1_RS06225	DUF2793 domain-containing protein	1.77441	1.37123	1.89622	1.95416	2.29715	3.00361	2.14819	1.83253	1.11348
MEXAM1_RS06230	hypothetical protein	0.818461	0.968141	0.934805	1.05606	1.09946	1.14021	0.866669	0.723085	0.729429
MEXAM1_RS06235	NA	0.649888	0.550255	2.11445	0.645539	0.610131	0.613058	0	1.14517	0.647684
MEXAM1_RS06240	DUF2163 domain-containing protein	0.717932	0.734119	0.553435	0.721913	1.31069	1.66248	0.566705	1.19239	0.641078
MEXAM1_RS06245	TIGR02217 family protein	0.35478	0.804601	0.647994	0.82918	1.35338	1.47276	0.42461	0.433242	0.616995
MEXAM1_RS06250	hypothetical protein	0.983893	1.25501	1.21253	1.60099	1.64091	1.05963	0.529989	0.721978	1.10027
MEXAM1_RS06255	NA	5.72501	3.55435	0	2.81766	2.73906	2.72579	5.00062	1.02987	0
MEXAM1_RS06260	gene transfer agent family protein	3.31168	1.39052	2.34656	7.02022	3.53081	4.5649	1.9918	2.62276	3.72881
MEXAM1_RS06265	phage major tail protein, TP901-1 family	1.44578	1.95181	1.55686	1.71402	0.805592	1.08038	1.04009	1.78007	1.29793
MEXAM1_RS06270	DUF3168 domain-containing protein	0.274006	0.925315	2.65893	2.98057	2.04039	1.79493	0.394187	1.47074	1.43447
MEXAM1_RS06275	NA	1.92546	0	3.58952	2.35567	0.88135	0.886589	1.04101	0.760925	2.1693
MEXAM1_RS06280	hypothetical protein	1.42365	0.604891	0.466945	0.569329	1.48802	1.49485	0.306855	0.315331	1.06201
MEXAM1_RS06285	peptidase S1	2.56142	2.1808	2.01065	1.83675	2.5408	1.93585	1.96988	2.45928	1.70291
MEXAM1_RS06290	peptidase S1	57.1364	55.9772	52.0085	52.9265	57.2226	53.4452	54.8571	57.3586	52.9829
MEXAM1_RS06295	phage major capsid protein	10.2685	10.8143	9.93433	10.7142	11.3121	10.2559	9.64718	9.92503	9.86398
MEXAM1_RS06300	HK97 family phage prohead protease	3.79226	3.03348	2.51567	5.2354	2.96998	3.58107	3.02953	1.11186	0.944952
MEXAM1_RS06305	phage portal protein	1.50082	2.21882	2.15348	2.82214	1.88136	2.66369	1.68673	0.932901	1.86001
MEXAM1_RS06310	ATP-binding protein	2.86246	2.59698	2.85988	5.08239	4.38452	4.26961	1.46663	2.08263	1.79038
MEXAM1_RS06315	hypothetical protein	28.3675	23.3046	23.052	36.0808	36.1705	32.6978	14.6048	13.7295	14.7899
MEXAM1_RS06320	precorrin-3B C(17)-methyltransferase	241.011	232.531	235.68	290.989	276.937	261.348	74.1019	60.8682	73.7059
MEXAM1_RS06325	precorrin-2 C(20)-methyltransferase	8.02114	8.41326	10.8643	10.432	9.55333	10.5701	6.36305	6.54982	7.10261
MEXAM1_RS06330	precorrin-8X methylmutase	8.23116	6.79424	8.35552	7.63746	5.76994	7.18686	9.91064	7.01297	9.38459
MEXAM1_RS06335	precorrin-3B synthase	1.86956	1.78484	1.62226	2.28791	2.14807	1.12135	1.02175	1.14736	0.794253
MEXAM1_RS06340	cobaltochelatase subunit CobN	1.69594	1.45967	1.90906	1.52156	1.54492	1.97339	1.36012	1.45867	1.71011
MEXAM1_RS06345	DUF4349 domain-containing protein	2.00085	1.76589	2.12481	1.509	1.57933	1.24112	1.84602	1.4447	1.91426
MEXAM1_RS06350	cobalamin biosynthesis protein CobW	4.00199	3.46227	3.18004	3.61379	4.76017	4.1535	5.02471	5.75646	6.3912
MEXAM1_RS06355	DUF1636 domain-containing protein	4.50473	1.51897	2.5823	2.96242	3.61866	3.07985	4.31859	3.70625	2.69556
MEXAM1_RS06360	cobalt transporter	4.5568	4.18433	3.53567	4.57545	6.93408	6.36215	5.45134	5.44954	5.52159
MEXAM1_RS06365	cobalt transporter	272.682	209.238	201.186	224.515	289.035	240.422	323.013	346.519	385.782
MEXAM1_RS06370	DUF1772 domain-containing protein	5.11597	4.77546	6.68071	7.45946	6.52217	7.56452	4.84221	4.74304	6.24165
MEXAM1_RS06375	MarR family transcriptional regulator	6.34434	3.91147	5.64575	9.95285	14.3155	11.1066	8.01708	7.49642	8.33259
MEXAM1_RS06380	bifunctional adenosylcobinamide kinase/adenosylcobinamide-phosphate guanylyltransferase	4.47074	8.1921	3.11653	4.09977	3.71653	8.99572	3.21388	4.00713	4.54191
MEXAM1_RS06385	cob(I)yrinic acid a,c-diamide adenosyltransferase	5.78153	8.0431	8.19778	7.3637	7.37905	9.17146	6.13569	6.5739	5.58592
MEXAM1_RS06390	class II fumarate hydratase	2.46393	3.19998	2.56571	2.98919	2.2779	2.63306	1.99766	2.2438	2.30904
MEXAM1_RS06395	formaldehyde-activating enzyme	16.9781	22.1702	22.9022	21.2675	21.8562	24.2445	27.6284	24.1443	27.1439
MEXAM1_RS06400	hypothetical protein	153.351	142.054	123.429	148.324	153.683	121.204	100.091	105.798	110.43
MEXAM1_RS06405	hypothetical protein	9.69931	6.40202	5.12022	9.61869	10.6276	11.5687	16.6689	12.5803	14.5034
MEXAM1_RS06410	alpha/beta hydrolase	23.6649	21.4675	21.7285	25.2584	23.7145	21.4248	7.68116	9.09944	7.47759
MEXAM1_RS06415	methyl-accepting chemotaxis protein	1.18289	1.22489	0.891225	1.34647	1.46202	1.22289	1.93111	1.93452	2.05694
MEXAM1_RS06420	PAS domain S-box protein	1.20184	1.49102	0.903601	1.35078	1.40567	1.27861	0.829282	0.757944	0.741258
MEXAM1_RS06430	membrane protein	3.39838	3.61995	3.82082	4.41428	2.65356	3.48441	2.28622	2.55548	1.89655
MEXAM1_RS06435	AraC family transcriptional regulator	4.79672	4.21456	3.79547	3.91793	5.03855	4.84276	2.85064	3.52141	3.79285
MEXAM1_RS06440	hypothetical protein	21.6135	24.6559	22.0332	22.4495	18.1135	21.6857	11.3863	13.1897	12.2439
MEXAM1_RS06445	DUF4159 domain-containing protein	22.0286	23.3322	22.2657	21.908	17.1587	20.3054	13.4455	14.2262	13.3206
MEXAM1_RS06450	DUF58 domain-containing protein	24.6784	30.0952	25.2692	29.0848	23.0533	20.1962	17.6587	19.7142	17.7935
MEXAM1_RS06455	MoxR family ATPase	78.5052	77.3839	78.2527	72.2909	66.51	68.8332	54.4091	56.2316	54.6028
MEXAM1_RS06460	PaaI family thioesterase	14.1043	17.4514	16.3341	16.222	14.1123	15.6027	12.137	10.3755	8.09476
MEXAM1_RS06465	DUF1285 domain-containing protein	12.9992	15.7987	10.3941	12.8592	9.69917	11.0782	10.645	10.3114	9.38496
MEXAM1_RS06470	CoA pyrophosphatase	3.43973	4.02419	2.94843	3.87963	3.69685	4.64173	2.85554	4.00352	3.76409
MEXAM1_RS06475	hypothetical protein	4.52346	0.939617	3.58159	8.92129	5.29869	3.18509	3.2076	6.79958	4.97298
MEXAM1_RS06480	CCA tRNA nucleotidyltransferase	4.68372	5.34043	4.1279	5.67321	4.21581	5.80303	4.00578	3.96682	2.97998
MEXAM1_RS06485	F0F1 ATP synthase subunit epsilon	52.6479	54.9604	52.2902	49.4988	48.4912	49.0556	55.2274	56.0254	50.8555
MEXAM1_RS06490	hypothetical protein	235.52	218.043	232.848	183.385	177.86	182.054	176.303	157.34	168.747
MEXAM1_RS06495	F0F1 ATP synthase subunit beta	37.8541	40.9411	46.476	36.2054	42.8087	37.4164	35.8626	33.1371	35.4625
MEXAM1_RS06500	ATP synthase subunit gamma	17.8884	17.0253	22.0818	16.6091	22.1081	19.9729	19.0481	19.2221	22.114
MEXAM1_RS06505	ATP synthase subunit alpha	36.7295	40.3595	44.7823	33.1164	42.4302	41.7183	42.4486	41.8531	45.1149
MEXAM1_RS06510	F0F1 ATP synthase subunit delta	41.486	42.8901	42.015	40.4525	41.7453	44.7059	51.8997	54.9863	57.031
MEXAM1_RS06515	ferrochelatase	18.6232	20.0058	18.0595	17.5609	18.6442	15.3996	14.814	15.6876	14.8553
MEXAM1_RS06520	class I SAM-dependent methyltransferase	16.834	15.2224	17.5658	14.2333	16.75	15.2106	17.5439	17.4751	14.7138
MEXAM1_RS06525	bifunctional metallophosphatase/5'-nucleotidase	2.28303	2.92253	3.01173	1.85672	2.88229	2.10749	2.53539	1.84115	2.38115
MEXAM1_RS06530	uracil-DNA glycosylase	5.90369	6.93016	8.49264	7.75988	5.93717	6.45224	5.33451	6.45569	5.30761
MEXAM1_RS06535	sulfurtransferase	17.5949	16.2765	14.9804	18.4811	17.19	14.8079	12.9703	17.2898	16.2961
MEXAM1_RS06540	chromate transporter	14.0363	13.615	14.3157	12.8611	13.1321	12.5624	9.29322	9.321	8.02608
MEXAM1_RS06545	hypothetical protein	291.34	244.304	250.047	284.454	293.061	276.461	187.85	147.569	196.424
MEXAM1_RS06550	peptidyl-prolyl cis-trans isomerase	26.5498	27.0893	30.2547	23.7801	28.5088	29.3784	19.1534	20.0861	21.8631
MEXAM1_RS06555	preprotein translocase subunit SecA	22.9132	22.8375	22.1758	22.8995	23.8401	21.9402	24.383	24.3898	24.0772
MEXAM1_RS06560	GNAT family N-acetyltransferase	4.33733	6.83133	5.6047	9.42712	8.32445	7.83274	5.8245	5.78524	7.13862
MEXAM1_RS06565	class C beta-lactamase	1.61669	1.50815	2.11888	1.88297	1.60751	1.8584	1.15976	1.34091	1.35245
MEXAM1_RS06570	4'-phosphopantetheinyl transferase	2.19487	2.6806	3.62513	2.79527	2.10851	3.59939	3.67515	2.80129	2.66777
MEXAM1_RS06575	NUDIX domain-containing protein	12.2136	14.3534	11.0269	12.1218	13.1461	9.58656	32.6866	32.7186	30.2686
MEXAM1_RS06580	Esterase, PHB depolymerase homolog	33.5232	33.0816	34.4179	27.9851	32.1318	28.6586	80.8164	75.8533	73.8285
MEXAM1_RS06585	CopG family transcriptional regulator	133.048	138.16	143.022	120.416	143.353	143.616	350.973	342.527	337.496
MEXAM1_RS06590	DNA polymerase III subunit epsilon	1.80819	2.30852	2.64714	2.41875	3.65093	3.66703	5.55322	6.44168	6.58478
MEXAM1_RS06595	dephospho-CoA kinase	3.24963	4.99512	4.92813	3.25361	4.40593	3.94738	2.60343	3.12027	2.05016
MEXAM1_RS06600	shikimate dehydrogenase	3.46707	3.62473	2.51466	2.37565	3.55439	3.03786	2.31857	1.65376	2.22864
MEXAM1_RS06605	cation transporter	4.21085	5.41042	6.34353	3.88037	4.91082	4.52931	3.44664	4.09537	4.49966
MEXAM1_RS06610	septum formation protein Maf	3.04933	2.9168	2.22607	3.30681	2.66224	3.40368	2.09904	2.42719	3.78955
MEXAM1_RS06615	glycosyltransferase family 61 protein	1.92637	1.73171	1.37888	2.35972	1.80674	1.25966	2.39041	1.7188	2.2456
MEXAM1_RS06620	kinase/pyrophosphorylase	12.1014	11.8683	12.6151	11.7607	12.3768	12.5062	16.8557	19.1916	17.0665
MEXAM1_RS06625	uroporphyrinogen decarboxylase	3.77062	4.87023	3.24192	4.24332	4.22034	4.07632	5.68873	6.73254	6.02103
MEXAM1_RS06630	NUDIX domain-containing protein	1.86406	1.9709	2.01795	2.54237	2.40012	2.41186	3.18305	1.94517	2.78778
MEXAM1_RS06635	protoporphyrinogen oxidase HemJ	1.46378	3.09442	2.90255	2.90238	1.82496	3.4384	3.3334	2.5998	3.28304
MEXAM1_RS06640	hypothetical protein	53.4314	48.8866	46.1509	59.3628	50.6776	60.288	60.0318	49.4601	54.9556
MEXAM1_RS06645	ATP phosphoribosyltransferase	4.95129	5.57339	5.80715	6.70677	6.29088	6.68446	7.37847	7.08652	6.84731
MEXAM1_RS06650	ATP phosphoribosyltransferase regulatory subunit	3.78911	3.10248	4.01471	3.71504	4.14057	3.81461	4.6753	5.03747	4.43304
MEXAM1_RS06655	TIGR01459 family HAD-type hydrolase	3.26121	3.33464	2.63351	2.69616	3.20288	2.93652	3.6404	4.60626	4.53003
MEXAM1_RS06660	TetR family transcriptional regulator	2.33675	3.45129	3.77233	3.07883	2.9302	2.23699	2.82661	2.52692	2.20053
MEXAM1_RS06665	acyl-[ACP]--phospholipid O-acyltransferase	7.79856	7.00976	7.12434	6.33553	6.36411	6.88288	7.15622	7.7822	6.62432
MEXAM1_RS06670	type II toxin-antitoxin system RelE/ParE family toxin	74.9926	74.5706	62.1563	105.034	77.4158	93.5479	67.7691	66.6632	54.2917
MEXAM1_RS06675	transcriptional regulator	101.074	97.7686	98.3588	189.533	162.798	171.703	72.9518	81.11	70.788
MEXAM1_RS06680	DSBA oxidoreductase	16.855	15.3342	17.9142	20.4087	23.8045	23.4019	15.9829	18.8806	16.98
MEXAM1_RS06685	membrane protein	6.71672	5.61981	6.03302	9.20019	9.45653	7.27144	6.06864	5.82076	6.52323
MEXAM1_RS06690	gamma carbonic anhydrase family protein	20.7998	22.2684	20.2324	23.2221	23.3049	19.7014	20.9697	19.9514	20.8511
MEXAM1_RS06695	molybdenum cofactor biosynthesis protein MoaE	22.9538	26.6052	22.3735	21.8654	23.6569	22.9076	14.3578	15.4876	21.4536
MEXAM1_RS06700	AI-2E family transporter	5.26856	5.29922	5.10213	6.15864	5.22438	5.62996	4.63519	4.02786	5.06336
MEXAM1_RS06705	Malate dehydrogenase (quinone), Mqo	42.0516	49.5041	53.5861	42.9847	55.5731	51.7311	7.42764	7.62317	9.6272
MEXAM1_RS06710	VWA domain-containing protein	6.36571	7.32531	6.91422	6.56494	5.79679	7.04236	5.83506	6.34214	6.49929
MEXAM1_RS06715	hypothetical protein	5.04347	5.10025	5.43598	4.35525	4.19977	4.58091	5.29786	5.03316	5.3245
MEXAM1_RS06720	ATPase	10.5291	10.5988	12.1552	9.18182	11.035	11.6041	13.6278	16.0979	13.6024
MEXAM1_RS06725	hypothetical protein	4.91072	4.89964	5.69651	5.54614	5.11493	6.27541	6.07663	5.949	6.3742
MEXAM1_RS06730	hypothetical protein	5.69669	4.82545	6.47582	7.36568	8.45077	9.2038	10.0967	9.35999	8.56169
MEXAM1_RS06735	glucose-6-phosphate dehydrogenase	6.59132	6.72497	5.81996	6.75845	6.01366	6.25102	5.20284	5.33934	4.37913
MEXAM1_RS06740	uracil-DNA glycosylase	2.14521	2.93921	2.08948	2.02921	3.86379	3.08214	3.16656	2.6204	2.22073
MEXAM1_RS06745	alginate export family protein	0.361295	0.339176	0.359418	0.473681	0.977691	1.12164	0.777379	0.696633	1.04729
MEXAM1_RS06750	orotidine-5'-phosphate decarboxylase	10.4188	9.04201	10.1908	8.27718	8.57971	9.90548	8.88713	9.25372	9.98997
MEXAM1_RS06755	DUF1330 domain-containing protein	55.7655	42.496	49.4616	45.4557	43.3791	54.407	54.3737	50.0081	57.3561
MEXAM1_RS06760	TetR/AcrR family transcriptional regulator	72.9004	74.4301	74.0113	71.7517	64.6205	62.5388	23.5083	25.8454	26.8055
MEXAM1_RS06765	hypothetical protein	1763.47	1771.06	1756.58	2065.19	1969	1735.55	477.736	491.083	482.065
MEXAM1_RS06770	dUTP diphosphatase	4.34251	7.67352	6.10794	4.86852	6.49234	4.29192	5.20302	5.27374	6.62269
MEXAM1_RS06775	DUF429 domain-containing protein	4.08061	4.28821	4.39115	3.74938	3.91126	4.59664	1.86951	2.33071	2.65016
MEXAM1_RS06780	NUDIX domain-containing protein	10.3059	8.47195	10.3522	14.0403	8.83052	13.23	5.52604	9.24211	5.1299
MEXAM1_RS06785	carbonic anhydrase	44.6287	51.3244	50.4854	50.5965	51.9647	52.7052	31.3569	27.0828	30.2481
MEXAM1_RS06790	3'(2'),5'-bisphosphate nucleotidase CysQ	10.2191	9.64435	10.9553	8.55392	11.0771	7.81241	6.64387	6.87722	6.42981
MEXAM1_RS06795	histidine phosphotransferase	24.1373	25.2043	23.4115	23.3754	21.0316	21.4858	34.5181	31.062	33.4927
MEXAM1_RS06800	hybrid sensor histidine kinase/response regulator	3.61628	5.10566	5.23048	3.93192	7.33203	5.00764	22.5826	18.5686	22.8607
MEXAM1_RS06805	chemotaxis protein CheW	12.1424	13.8888	16.9303	9.46125	21.1392	18.752	37.9757	40.9504	41.598
MEXAM1_RS06810	response regulator	4.57745	6.59468	7.26164	4.79537	9.78325	7.81667	24.211	26.8085	26.9801
MEXAM1_RS06815	chemotaxis response regulator protein-glutamate methylesterase	1.64375	2.58477	2.26752	2.53522	3.26838	3.03275	6.85404	6.08141	7.79239
MEXAM1_RS06820	protein-glutamate O-methyltransferase CheR	0.45638	1.68489	1.92573	1.68208	2.11805	1.68687	4.09397	2.69501	5.9439
MEXAM1_RS06825	allophanate hydrolase subunit 1	0.680923	1.73884	1.60256	0.780901	1.30312	2.80464	1.18712	1.487	1.30406
MEXAM1_RS06830	urea amidolyase	2.10012	1.99509	2.18327	2.295	2.0218	2.84197	1.24847	0.777058	1.20509
MEXAM1_RS06835	UV damage repair endonuclease	11.0414	13.8903	13.1458	13.8154	13.6936	10.9458	5.37233	5.61422	5.28467
MEXAM1_RS06840	TIGR02302 family protein	41.7384	42.7774	39.2708	40.5702	34.3899	37.3499	26.2319	28.0545	26.2325
MEXAM1_RS06845	twin transmembrane helix small protein	135.523	106.89	126.295	248.967	265.908	217.496	22.3903	31.0637	37.0528
MEXAM1_RS06850	hypothetical protein	119.298	128.728	129.295	228.563	203.027	182.006	33.1585	33.426	32.648
MEXAM1_RS06855	acyloxyacyl hydrolase	15.2548	19.0542	15.5405	12.8914	19.6599	15.0682	42.6202	39.306	34.9988
MEXAM1_RS06860	ATP:cob(I)alamin adenosyltransferase	11.0647	10.0122	9.26797	10.4864	9.28285	9.59984	6.7107	5.94362	6.21759
MEXAM1_RS06865	electron transfer flavoprotein subunit beta/FixA family protein	44.1607	51.8646	55.2415	50.7438	44.5049	46.6569	31.9653	25.9748	27.9209
MEXAM1_RS06870	electron transfer flavoprotein subunit alpha	37.2239	38.3866	40.5849	34.0148	33.9086	36.5835	26.1912	28.7683	26.5215
MEXAM1_RS06875	3-hydroxybutyryl-CoA dehydrogenase	45.5801	48.5002	46.4016	46.784	48.7067	47.2861	60.0625	59.7784	57.3844
MEXAM1_RS06880	hypothetical protein	5198.92	4915.74	5050.16	5872.69	5389.66	4646.95	1959.29	1810	1977.02
MEXAM1_RS06885	NAD(P)H quinone oxidoreductase	14.8753	16.5638	18.8101	16.4381	14.8449	13.9661	9.01736	10.3987	8.85207
MEXAM1_RS06890	uracil phosphoribosyltransferase	12.8302	12.5842	13.0507	9.03296	11.8	10.6344	10.624	12.6086	11.3708
MEXAM1_RS06895	glycogen debranching enzyme GlgX	3.85058	3.13835	3.90143	4.69461	3.72817	3.81496	3.26328	2.40227	2.28503
MEXAM1_RS06900	trehalose-6-phosphate synthase	59.1454	59.8868	57.76	62.6031	54.4765	51.4114	31.5489	34.5866	32.7546
MEXAM1_RS06905	hypothetical protein	293.442	335.216	333.11	377.846	354.985	331.221	133.279	122.09	130.693
MEXAM1_RS06910	phage holin family protein	182.977	194.078	211.447	248.643	207.74	196.069	71.4194	63.5655	73.8255
MEXAM1_RS06915	DUF3618 domain-containing protein	215.658	277.766	264.998	313.775	279.21	254.752	81.717	77.0325	69.8769
MEXAM1_RS06920	DUF883 domain-containing protein	299.966	360.333	385.984	383.368	375.431	363.025	100.183	78.4142	86.715
MEXAM1_RS06925	histidine--tRNA ligase	8.99372	9.79707	10.9509	9.95483	11.1999	10.2143	7.86644	7.83361	7.77169
MEXAM1_RS06930	tRNA-binding protein	9.79401	9.49682	8.85625	7.0341	9.70028	9.06222	2.71027	4.12238	5.64227
MEXAM1_RS06935	DUF3429 domain-containing protein	11.4045	9.23819	7.34521	8.44371	8.16943	7.5513	4.22311	5.15268	3.87176
MEXAM1_RS06940	MFS transporter	3.72441	3.92245	4.16329	3.15071	3.8599	2.93967	2.11089	1.67977	1.94862
MEXAM1_RS06945	protein-export chaperone SecB	55.0052	63.5367	55.9566	52.8324	62.3606	53.3915	61.2656	60.8509	68.2543
MEXAM1_RS06950	calcium-binding protein	164.83	171.663	171.597	187.628	186.627	181.672	160.271	166.453	159.971
MEXAM1_RS06955	transglycosylase	7.83084	7.97166	7.47182	8.49879	8.76826	8.70514	6.55992	5.65356	6.27389
MEXAM1_RS06960	DNA mismatch repair protein MutS	4.14399	3.67602	4.65145	4.76894	4.38611	3.90636	2.41667	2.50513	2.76375
MEXAM1_RS06965	transcription termination factor Rho	19.5331	19.7975	18.0819	24.8352	23.5436	24.0847	21.576	21.3104	23.6476
MEXAM1_RS06970	Ubiquinone-dependent pyruvate dehydrogenase, PoxB	18.3375	20.9064	23.7515	24.1458	24.3508	21.8477	5.66161	5.36294	6.65194
MEXAM1_RS06975	hypothetical protein	5.46705	5.01298	7.08943	7.7258	7.51712	7.88212	5.71069	3.94465	4.8402
MEXAM1_RS06980	TerC family protein	14.5302	13.9565	12.6908	14.7725	17.4803	15.1378	15.3109	14.4905	15.7448
MEXAM1_RS06985	lipid kinase	16.4504	17.5541	15.3523	17.3674	23.4633	20.7379	21.9498	22.9945	27.6151
MEXAM1_RS06990	hypothetical protein	20.2992	20.6661	20.02	23.4845	22.812	22.5977	15.9036	14.3489	14.0261
MEXAM1_RS06995	hypothetical protein	18.7066	19.8941	20.5652	19.5998	19.4432	19.5611	14.4791	14.4795	14.4893
MEXAM1_RS07000	phosphatase PAP2 family protein	4.33725	4.25933	3.64236	5.02588	4.80192	3.54553	2.47943	4.67399	3.88411
MEXAM1_RS07005	hydrolase	9.44911	10.08	7.9431	8.70344	8.94026	8.28146	7.0395	9.37662	7.03141
MEXAM1_RS07010	transcriptional regulator	82.0839	88.1862	89.9422	75.7528	89.4018	86.986	75.9077	91.879	82.6308
MEXAM1_RS07015	toxin RelE	21.1645	20.4757	15.105	21.8749	17.5574	26.49	22.0646	25.0205	23.2386
MEXAM1_RS07020	2,3,4,5-tetrahydropyridine-2,6-dicarboxylate N-succinyltransferase	19.2651	20.9965	22.8329	18.7349	21.1872	18.8711	26.1963	28.2161	24.8458
MEXAM1_RS07025	Crp/Fnr family transcriptional regulator	15.8074	16.0997	14.6016	13.3727	19.0623	16.3308	23.8035	24.6611	24.5913
MEXAM1_RS07030	DNA-binding response regulator	16.643	19.2128	18.6121	17.0072	20.3604	14.9569	22.9088	21.3567	20.1391
MEXAM1_RS07035	hypothetical protein	7.68716	7.68052	6.49264	4.31755	7.31282	8.11951	6.29782	5.76133	6.53864
MEXAM1_RS07040	YggS family pyridoxal phosphate-dependent enzyme	28.4881	29.7581	29.4478	26.7141	26.1987	27.8445	29.5982	30.7986	24.4248
MEXAM1_RS07045	leucine--tRNA ligase	7.98559	8.22717	9.59338	8.84772	9.03491	8.89842	5.73986	5.41167	6.10487
MEXAM1_RS07050	tRNA uridine-5-carboxymethylaminomethyl(34) synthesis GTPase MnmE	2.5098	2.39542	2.86631	2.5727	2.2588	2.88601	1.86127	1.85678	1.7077
MEXAM1_RS07055	PAS domain S-box protein	1.13562	0.917235	0.593132	0.902412	1.15086	0.924408	0.814775	0.773975	0.622421
MEXAM1_RS07060	hypothetical protein	40.3093	39.5408	42.6896	48.0123	42.8696	50.0978	9.38351	6.1431	13.8038
MEXAM1_RS07065	tRNA uridine-5-carboxymethylaminomethyl(34) synthesis enzyme MnmG	1.81627	2.54393	2.57431	2.00474	2.11457	2.37059	2.25903	2.64854	2.10877
MEXAM1_RS07070	ribosomal RNA small subunit methyltransferase G	1.20099	3.77923	1.05282	2.4058	1.94672	1.61042	1.38006	2.0253	2.14866
MEXAM1_RS07075	ParA family protein	13.9266	16.1857	13.7474	14.6841	13.3732	13.7211	16.9468	14.2826	13.6879
MEXAM1_RS07080	chromosome partitioning protein ParB	26.8685	26.4883	23.2942	22.9943	20.2566	20.0648	24.306	24.2503	18.9831
MEXAM1_RS07085	DNA polymerase III subunit delta	6.08517	6.19557	6.05868	6.06587	6.54175	7.1964	7.46014	7.18129	7.38262
MEXAM1_RS07090	hypothetical protein	17.9645	20.043	22.7816	21.7472	22.6759	19.59	33.1476	28.7543	35.7885
MEXAM1_RS07095	hypothetical protein	328.969	333.672	326.247	399	368.078	388.19	274.233	313.754	277.28
MEXAM1_RS07100	DUF2125 domain-containing protein	18.2258	17.0644	18.0197	16.1207	17.7194	18.2086	11.1354	15.846	13.3935
MEXAM1_RS07105	hypothetical protein	42.5344	46.2821	51.2828	34.9628	54.5965	41.0957	74.304	56.5409	54.715
MEXAM1_RS07110	hypothetical protein	44.2457	40.6102	54.6676	50.7258	48.5309	59.4984	74.6913	74.0112	63.4609
MEXAM1_RS07115	hypothetical protein	13.1678	12.5268	11.1382	12.2431	12.5355	13.486	10.5937	11.6984	10.4895
MEXAM1_RS07120	prephenate dehydrogenase/arogenate dehydrogenase family protein	3.6897	5.37461	3.6957	5.06128	4.32215	4.01603	3.85096	5.2242	3.94308
MEXAM1_RS07125	histidinol-phosphate transaminase	6.43066	6.57188	7.91646	5.45935	6.96608	6.89095	6.51969	6.21919	6.60036
MEXAM1_RS07130	hypothetical protein	4.73232	8.35543	8.78876	9.22267	11.3286	6.90449	9.64066	7.10817	8.25175
MEXAM1_RS07135	TonB-dependent siderophore receptor	3.36766	3.41115	2.95623	3.30616	3.62145	3.63487	11.5248	9.36671	8.19613
MEXAM1_RS07140	potassium transporter Kup	9.15909	8.64907	7.7532	11.3902	10.6698	10.5057	10.6896	11.7524	11.3487
MEXAM1_RS07145	flavodoxin-dependent (E)-4-hydroxy-3-methylbut-2-enyl-diphosphate synthase	82.7292	88.7953	85.7579	84.5516	78.0918	81.007	104.813	107.628	101.635
MEXAM1_RS07150	esterase, patatin-like protein PhaZh1 (HFX_6464) homolog	12.5273	15.2777	14.908	16.5504	17.6826	15.2801	30.3532	28.287	29.4258
MEXAM1_RS07155	methyltransferase domain-containing protein	18.825	19.9406	22.0987	21.6837	25.2481	27.1364	42.4651	38.7761	41.6187
MEXAM1_RS07160	methylenetetrahydrofolate reductase [NAD(P)H]	26.8002	29.878	31.9868	26.2772	30.1936	29.3377	38.4126	36.3619	38.9737
MEXAM1_RS07165	methionine synthase	11.5745	11.9666	11.3817	10.0872	10.6031	10.4366	12.6837	11.1358	12.963
MEXAM1_RS07170	hypothetical protein	43.7484	42.135	28.4077	43.4441	59.9681	28.5193	57.1982	36.3191	51.2085
MEXAM1_RS07175	GNAT family N-acetyltransferase	1.3081	0.950481	1.23011	1.12265	1.7757	1.40739	3.02361	2.98686	3.42227
MEXAM1_RS07180	polysaccharide deacetylase	0.230116	0.441468	0.317239	0.347497	0.941902	0.778802	1.98115	1.90246	1.58319
MEXAM1_RS07185	hypothetical protein	3.47007	3.56149	2.41203	3.43925	5.32627	3.25853	8.91247	8.68847	11.1114
MEXAM1_RS07190	DUF2842 domain-containing protein	26.9279	28.7655	35.7334	36.2954	33.0221	43.755	31.4719	18.3722	22.9501
MEXAM1_RS07195	heme A synthase	11.5576	11.1714	12.9816	11.8483	10.5975	10.192	12.0498	15.3325	11.956
MEXAM1_RS07200	DNA-binding protein	38.1595	41.1565	45.17	53.9915	54.9392	46.3142	19.9116	21.8231	23.0651
MEXAM1_RS07205	hypothetical protein	38.2217	22.9882	22.4976	33.5281	43.5437	33.7697	40.0712	23.4227	33.7589
MEXAM1_RS07210	phosphomethylpyrimidine synthase ThiC	48.6976	53.9392	56.6982	56.4245	62.1193	59.3261	42.7121	45.6465	43.902
MEXAM1_RS07215	hypothetical protein	25.5792	23.3933	27.7563	33.5606	45.2096	39.9657	84.2395	67.7828	88.445
MEXAM1_RS07220	flagellar protein FlaF	29.1157	38.0754	44.902	46.7373	53.5788	54.9033	73.1686	67.3311	77.5139
MEXAM1_RS07225	hypothetical protein	1471.45	1440.12	1525.99	1620.85	1758.21	1527.82	1580.74	1398.66	1468.7
MEXAM1_RS07230	hypothetical protein	534.836	539.523	560.828	585.918	638.067	531.05	299.567	355.385	313.22
MEXAM1_RS07235	metallophosphoesterase	20.3078	17.7476	17.9158	15.0791	15.7061	19.9308	16.0493	14.3629	11.7958
MEXAM1_RS07240	cell envelope biogenesis protein TonB	201.79	176.661	177.537	158.769	132.838	144.237	132.968	140.281	126.337
MEXAM1_RS07245	protein TolR	293.321	271.384	258.219	221.899	206.174	219.39	295.86	302.577	249.833
MEXAM1_RS07250	flagellar motor protein MotA	510.083	519.904	478.505	454.389	398.443	410.54	469.781	477.951	410.89
MEXAM1_RS07255	hypothetical protein	340.568	310.421	324.75	277.639	254.242	265.656	390.191	402.344	350.368
MEXAM1_RS07260	heat-shock protein Hsp20	778.514	723.073	633.398	740.244	675.347	675.229	719.821	798.82	704.306
MEXAM1_RS07265	DUF1150 domain-containing protein	2207.37	2376.11	2370.2	2542.08	2771.15	2286.72	1522.01	1528.95	1655.14
MEXAM1_RS07270	alpha/beta hydrolase	60.5195	59.9191	66.0696	71.1005	79.3637	66.8237	50.3163	44.5913	51.1616
MEXAM1_RS07275	glycosyl transferase	9.3748	9.16238	8.63409	12.0093	11.2256	11.5891	8.17797	7.1228	8.68672
MEXAM1_RS07280	translation initiation factor IF-3	705.869	732.454	690.661	739.834	646.226	620.928	285.586	289.378	277.671
MEXAM1_RS07285	amylo-alpha-1,6-glucosidase	14.0042	18.0704	17.0425	17.1284	16.0047	15.7203	11.5625	10.7585	11.6347
MEXAM1_RS07290	glycosyltransferase family 4 protein	165.919	156.829	165.564	167.845	166.681	164.815	254.696	240.153	240.166
MEXAM1_RS07295	50S ribosomal protein L35	1100.98	1066.58	1136.74	991.555	1062.61	970.881	966.203	972.93	1041.02
MEXAM1_RS07300	50S ribosomal protein L20	223.568	252.736	265.493	218.069	228.883	211.305	266.904	299.076	287.822
MEXAM1_RS07305	phenylalanine--tRNA ligase subunit alpha	3.61734	5.12513	5.77056	4.31467	6.112	5.38287	8.62396	10.316	8.19518
MEXAM1_RS07310	phenylalanine--tRNA ligase subunit beta	5.08886	4.90714	5.56325	5.13852	5.99835	5.7112	7.73892	8.13909	8.83687
MEXAM1_RS07315	DUF1186 domain-containing protein	19.0576	18.6296	18.7868	17.0063	18.3767	17.4558	13.5171	14.3045	14.567
MEXAM1_RS07320	molybdopterin-synthase adenylyltransferase MoeB	7.20269	6.6126	7.4849	6.99647	9.44556	6.55522	7.06467	7.18465	9.70966
MEXAM1_RS07325	succinyl-diaminopimelate desuccinylase	2.76957	1.71796	2.0008	2.68841	2.23348	2.53479	2.52865	2.74512	2.73346
MEXAM1_RS07330	tRNA pseudouridine(38-40) synthase TruA	1.74853	1.01856	1.31469	1.38576	0.705051	0.885135	0.858738	1.20379	0.959363
MEXAM1_RS07335	methionyl-tRNA formyltransferase	2.85503	3.30225	3.5198	3.0769	4.7711	4.00321	2.82909	2.69658	3.08521
MEXAM1_RS07340	peptide deformylase	7.51479	9.04543	13.5207	10.6296	9.25108	9.46014	9.67333	9.64679	10.0514
MEXAM1_RS07345	DUF2029 domain-containing protein	1.11283	0.873435	1.22898	1.25611	0.816266	0.948838	1.88385	1.6573	1.85326
MEXAM1_RS07350	recombination protein RecR	11.9864	13.292	13.6911	17.8634	16.4958	16.5706	18.9992	19.739	19.1411
MEXAM1_RS07355	phosphoenolpyruvate carboxykinase (ATP)	4.31002	5.14444	5.62151	4.72121	7.87844	5.45745	7.34136	6.58365	7.7327
MEXAM1_RS07360	23S rRNA (adenine(2503)-C(2))-methyltransferase RlmN	8.71138	8.38948	8.0334	9.95575	11.5706	11.6593	13.1417	14.3732	14.5224
MEXAM1_RS07370	TetR/AcrR family transcriptional regulator	11.719	12.5108	10.3403	10.5076	13.4222	10.6185	20.066	21.2485	20.0306
MEXAM1_RS07375	malate dehydrogenase	24.307	27.1831	25.7874	18.7169	26.5	24.9178	41.486	39.2319	44.0751
MEXAM1_RS07380	ADP-forming succinate--CoA ligase subunit beta	14.9193	18.4648	17.4919	13.8026	17.3987	19.4501	21.4747	22.2314	20.5918
MEXAM1_RS07385	succinate--CoA ligase subunit alpha	18.5526	24.0218	20.5094	18.2173	21.3757	16.3606	24.3387	28.0563	27.0723
MEXAM1_RS07390	2-oxoglutarate dehydrogenase E1 component	30.5157	31.2635	31.0795	26.6638	31.8672	30.5602	37.7566	35.2328	38.8642
MEXAM1_RS07395	dihydrolipoyllysine-residue succinyltransferase	26.1363	31.0948	27.9245	26.3442	31.0137	27.2373	28.2282	25.0397	28.4297
MEXAM1_RS07400	dihydrolipoyl dehydrogenase	14.5162	16.2424	18.469	15.764	16.4924	16.6723	18.2136	18.5562	19.8868
MEXAM1_RS07405	hybrid sensor histidine kinase/response regulator	7.24138	6.83887	6.37543	5.71516	6.38557	5.33612	4.85682	3.89926	4.70902
MEXAM1_RS07410	hypothetical protein	3.26825	4.52949	2.9178	4.12181	3.11577	4.28893	2.52113	1.33158	1.44378
MEXAM1_RS07415	sarcosine oxidase subunit gamma	1.70812	1.24509	1.06935	1.46621	2.67477	1.98597	0.613396	0.716039	0.818612
MEXAM1_RS07420	sarcosine oxidase subunit alpha family protein	0.895156	0.623009	0.587538	0.770276	0.707172	0.629098	0.760691	0.588339	0.677217
MEXAM1_RS07425	NA	2.46441	1.37183	3.47284	0	1.50977	2.26461	2.93131	3.22126	1.84568
MEXAM1_RS07430	sarcosine oxidase subunit beta family protein	0.922371	0.668817	0.814779	0.650618	1.20147	0.893467	1.15787	1.18933	1.02867
MEXAM1_RS07435	GlxA family transcriptional regulator	0.740302	1.10443	0.816113	0.745029	1.72188	2.56349	0.708212	1.15461	1.00961
MEXAM1_RS07440	glutamine amidotransferase	1.75188	2.41194	2.15285	1.49113	1.87891	2.21191	2.85257	3.44983	2.60687
MEXAM1_RS07445	protein glxC	2.10559	2.4188	1.84858	3.16717	2.01225	1.81909	2.94785	2.38176	1.41179
MEXAM1_RS07450	FMN-binding glutamate synthase family protein	4.21882	4.03149	4.56708	3.82734	4.43987	2.86236	3.99443	4.31641	4.51626
MEXAM1_RS07455	type III glutamate--ammonia ligase	3.82824	3.45374	3.74206	4.16875	4.1198	4.22113	4.10321	4.12659	3.5658
MEXAM1_RS07460	hypothetical protein	2.86127	4.24776	4.28523	3.20852	5.5748	4.24326	3.34244	3.60642	3.33964
MEXAM1_RS07465	tRNA-Gly	8.81591	4.88512	1.93401	13.23	14.1244	35.3542	25.4677	7.12622	16.6977
MEXAM1_RS07470	metallophosphoesterase	2.68015	3.9558	3.23901	2.5387	4.42395	3.09749	5.67538	6.87087	5.36727
MEXAM1_RS07475	hypothetical protein	12.1596	3.90206	6.95834	7.33291	7.77847	7.8066	7.31771	6.50816	6.98859
MEXAM1_RS07480	hypothetical protein	9.91054	10.9832	10.7886	9.9736	10.611	10.7738	16.1325	14.2691	15.6662
MEXAM1_RS07485	hypothetical protein	8.8336	9.58303	10.5306	10.1221	8.05591	9.49445	15.4024	13.9848	14.0462
MEXAM1_RS07490	hypothetical protein	10.8428	7.57337	5.74703	11.7668	2.75084	7.74854	13.0092	12.4278	14.4909
MEXAM1_RS07495	hypothetical protein	12.9042	12.7475	11.3622	7.754	12.6956	10.9088	15.1224	14.7783	16.6367
MEXAM1_RS07505	hypothetical protein	464.086	445.532	378.676	368.547	380.916	406.635	507.535	552.717	506.131
MEXAM1_RS07510	hypothetical protein	4.82027	5.51856	5.38929	5.37558	6.58187	6.89991	6.97244	5.93479	6.10962
MEXAM1_RS07515	hypothetical protein	11.3787	13.8433	14.274	9.82932	13.7094	14.5066	15.1376	12.0776	12.853
MEXAM1_RS07520	hypothetical protein	36.2633	39.2576	35.3673	38.3308	45.9174	41.9086	56.0526	59.3663	61.1131
MEXAM1_RS07525	hypothetical protein	21.4389	21.6061	20.9076	22.3931	20.7177	24.1555	13.3054	18.3899	16.7687
MEXAM1_RS07530	hypothetical protein	7.51911	8.0751	9.16045	7.66867	9.48509	9.11322	9.73195	9.3074	10.2198
MEXAM1_RS07535	hypothetical protein	25.9088	37.2495	31.5738	35.5667	42.7005	53.4202	44.7806	75.6334	57.8024
MEXAM1_RS07540	ATP-dependent endonuclease	1.1675	1.46873	1.54025	1.17333	1.47133	1.5738	1.90588	1.88351	1.85806
MEXAM1_RS07545	hypothetical protein	1.99121	1.91264	2.74647	2.09927	1.5211	2.22675	3.75682	4.16741	4.65665
MEXAM1_RS07550	DEAD/DEAH box helicase	2.8297	2.54959	2.73767	2.06968	2.58988	2.42617	2.60426	2.7251	2.73125
MEXAM1_RS07555	ATP/GTP-binding protein	4.48946	4.76127	3.75428	4.56778	2.67376	3.94487	3.70171	3.69215	4.67867
MEXAM1_RS07565	NA	1.03914	0.352102	0.902723	0.826569	0.195412	0.196353	1.64367	1.25268	0.932067
MEXAM1_RS07575	bifunctional diguanylate cyclase/phosphodiesterase	2.20232	2.21261	2.17508	1.80952	2.30083	1.97343	5.83684	4.98872	6.14344
MEXAM1_RS07580	hypothetical protein	7.37106	7.42935	7.48366	6.52149	5.76481	5.79725	6.09738	6.61801	3.58605
MEXAM1_RS07585	methyl-accepting chemotaxis protein	4.59379	5.21098	5.0464	4.85267	5.15926	5.17875	5.4171	4.76991	5.61325
MEXAM1_RS07590	patatin	15.9184	17.7649	19.161	20.3018	18.0255	16.2609	6.5316	4.89617	5.8157
MEXAM1_RS07595	glutathione-dependent formaldehyde dehydrogenase	68.4416	74.825	79.1652	79.7118	69.4506	72.179	24.3526	23.7394	24.7254
MEXAM1_RS07600	KR domain-containing protein	29.1249	26.5052	24.3182	27.0852	22.4139	23.0393	13.1376	12.2509	11.5639
MEXAM1_RS07605	DUF1989 domain-containing protein	1.09799	0.467064	0.361308	0.880477	0.943698	1.47457	0.473017	0.240716	0.409062
MEXAM1_RS07610	NA	0.304482	0.258619	0.498867	0.608314	0	0.870669	0.546991	0.338285	0.454457
MEXAM1_RS07615	PAS domain-containing protein	4.73581	5.6938	4.01639	4.58311	5.61069	4.28373	2.22167	2.57783	1.94204
MEXAM1_RS07620	GGDEF domain-containing protein	1.25566	1.53091	1.70522	1.19401	1.38696	1.18343	1.338	1.51148	1.27992
MEXAM1_RS07625	PAS domain-containing protein	6.83296	6.50394	7.38566	6.13313	6.56595	7.21021	9.15536	7.64453	8.87408
MEXAM1_RS07630	hybrid sensor histidine kinase/response regulator	4.65022	5.04597	6.0926	5.01864	4.23644	5.4551	5.75121	5.48928	5.48304
MEXAM1_RS07635	hypothetical protein	24.1675	20.0262	28.3536	25.0054	16.8872	15.6736	29.566	20.6719	18.5653
MEXAM1_RS07640	multi-sensor hybrid histidine kinase (fragment)	34.6918	28.0185	40.7344	37.829	39.8754	49.6883	25.9806	20.9062	37.3513
MEXAM1_RS07645	FAD-dependent oxidoreductase	15.8469	13.858	15.9317	17.3913	19.9329	15.2431	13.9821	11.9879	15.9281
MEXAM1_RS07650	hypothetical protein	2.70842	6.83032	4.35018	4.99642	8.1202	6.28241	9.72822	7.62438	6.32943
MEXAM1_RS07655	XRE family transcriptional regulator	45.7806	36.3522	37.675	52.3621	52.8161	52.0259	62.0104	61.661	45.7369
MEXAM1_RS07660	ImmA/IrrE family metallo-endopeptidase	2.57808	3.71362	3.2666	2.08928	3.88907	2.85818	2.98983	4.11684	3.7667
MEXAM1_RS07665	nucleotidyltransferase	6.64107	6.41277	7.38393	8.73686	9.1223	9.47074	4.5653	4.12963	4.80048
MEXAM1_RS07670	hypothetical protein	6.68384	7.24123	10.2513	6.27341	6.18427	10.3646	6.63404	4.68393	5.00142
MEXAM1_RS07675	patatin	2.89489	3.27408	2.73618	2.79506	2.78735	2.85571	3.81485	2.33711	3.33976
MEXAM1_RS07680	hypothetical protein	11.2252	11.6219	20.9055	18.0261	20.4873	19.9564	11.3794	13.0363	12.8299
MEXAM1_RS07685	hypothetical protein	5.08518	5.6322	5.31355	5.21199	4.84962	3.96513	10.0208	9.27138	8.46164
MEXAM1_RS07690	hypothetical protein	0.996745	0.707448	0.639535	1.08479	0.796635	1.28008	0.417306	0.240773	0.680147
MEXAM1_RS07705	hypothetical protein	11.5685	17.1183	12.2189	13.9382	17.4053	14.3472	19.0268	22.0448	20.3592
MEXAM1_RS07710	hypothetical protein	1.10583	1.33319	1.27216	1.22604	1.40734	1.20171	1.92795	1.74194	1.43364
MEXAM1_RS07715	hypothetical protein	2.81275	1.83591	2.01237	2.1364	1.69584	2.05558	2.61057	2.33731	1.84446
MEXAM1_RS07720	class I SAM-dependent methyltransferase	1.85408	2.37043	2.6267	2.46476	2.41998	1.79045	3.42096	3.05492	2.11839
MEXAM1_RS07725	hypothetical protein	2.38844	2.71275	2.27772	2.08012	1.8336	1.91812	2.3998	3.28506	2.90367
MEXAM1_RS07730	hypothetical protein	38.982	17.9499	11.7366	36.1362	46.7098	27.9083	43.5437	41.3412	45.6552
MEXAM1_RS07735	IS3 family transposase	13.3737	11.4706	11.9703	12.7556	11.0748	11.7578	9.66975	10.11	10.0734
MEXAM1_RS07745	hypothetical protein	1.4953	0.904475	1.39063	2.97172	2.80917	1.81453	2.45713	1.77302	1.43715
MEXAM1_RS07750	sensor histidine kinase	1.2711	1.21952	1.28566	1.54683	0.969872	1.84496	1.29183	1.1026	1.10282
MEXAM1_RS07755	DNA-binding response regulator	6.19304	6.86805	4.97305	6.65073	6.96943	6.2583	5.63777	4.7694	7.08676
MEXAM1_RS07760	alpha/beta hydrolase	7.90372	5.1609	5.61163	5.71829	6.88238	7.40979	7.79219	10.0345	9.39983
MEXAM1_RS07765	class I SAM-dependent methyltransferase	22.7191	22.728	22.5369	26.4767	27.8926	24.431	39.0747	42.9202	45.0164
MEXAM1_RS07770	diguanylate cyclase	2.2269	2.38381	2.85408	2.16736	2.18613	2.03261	3.40074	3.25301	3.62696
MEXAM1_RS07775	hybrid sensor histidine kinase/response regulator	1.42987	1.73494	1.44352	1.34207	1.26296	1.09702	1.54703	1.66035	1.62153
MEXAM1_RS07780	NmrA/HSCARG family protein	8.16462	7.2095	6.29231	6.64123	6.27364	6.87252	6.6581	6.22215	7.95403
MEXAM1_RS07785	LysR family transcriptional regulator	6.3178	5.13883	4.34842	4.11491	4.75989	3.80986	5.35794	5.96196	5.9834
MEXAM1_RS07790	LLM class flavin-dependent oxidoreductase	0.695564	1.53207	2.23734	1.10868	0.669847	1.23299	3.07736	2.87563	2.80232
MEXAM1_RS07795	hypothetical protein	3.12058	3.68253	4.02198	3.99987	5.77884	7.5548	26.4701	17.623	12.3765
MEXAM1_RS07800	LysR family transcriptional regulator	3.31801	2.70438	4.28927	2.61103	4.43548	4.10593	4.14088	4.94877	6.27996
MEXAM1_RS07805	IS3 family transposase	13.3737	11.4706	11.9703	12.7556	11.0748	11.7578	9.66975	10.11	10.0734
MEXAM1_RS07815	sulfite exporter TauE/SafE family protein	69.4358	58.9314	57.399	52.6718	41.8544	45.8331	90.882	98.8827	76.1536
MEXAM1_RS07820	BMP family ABC transporter substrate-binding protein	3.4756	2.00763	2.8444	2.70922	2.4841	2.76515	1.76958	1.89324	1.83448
MEXAM1_RS07825	hypothetical protein	34.1753	25.6283	47.3298	24.8635	29.9278	31.5131	12.5113	18.4293	12.4891
MEXAM1_RS07830	hypothetical protein	10.7711	15.821	3.76141	12.0985	13.904	15.1459	14.5255	1.22482	8.92503
MEXAM1_RS07835	peptidase S15	1.4859	1.32465	1.42389	1.399	1.50064	1.41019	1.27879	1.15434	0.662574
MEXAM1_RS07840	creatininase	0.650415	1.24651	1.25224	0.735199	1.01397	1.25329	0.641854	0.942162	0.665695
MEXAM1_RS07845	long-chain fatty acid--CoA ligase	1.19739	1.32251	1.28472	0.994557	1.3276	1.46936	0.55568	0.829712	0.628196
MEXAM1_RS07850	NAD(P)H dehydrogenase	0.549101	0.58337	1.05114	1.09848	0.522161	1.70475	1.4794	1.01188	1.12643
MEXAM1_RS07855	FAD-binding oxidoreductase	1.49914	1.31375	1.47725	1.10288	1.25217	1.45342	0.959034	2.14409	1.08429
MEXAM1_RS07860	isopenicillin N synthase family oxygenase	1.34416	0.76385	1.41091	1.03046	0.985292	0.927478	0.964455	0.968279	0.571411
MEXAM1_RS07865	myristoyl transferase	1.22124	0.76704	1.34594	1.35812	1.11305	1.24177	1.47581	1.34286	1.05198
MEXAM1_RS07870	aromatic ring-hydroxylating dioxygenase subunit alpha	1.51357	1.19502	1.66954	1.0724	1.24205	1.19281	1.16631	1.28902	1.29247
MEXAM1_RS07875	ABC transporter permease	0.849002	1.01226	0.653562	1.36446	1.38384	1.47155	1.70621	1.29278	0.948055
MEXAM1_RS07880	ABC transporter ATP-binding protein	0.20855	0.533183	0.382866	0.559323	0.801853	0.939358	0.947783	0.752451	0.775879
MEXAM1_RS07885	nitrate ABC transporter substrate-binding protein	3.0723	3.0466	2.34986	2.96547	3.19778	2.96846	3.23909	3.83759	2.612
MEXAM1_RS07890	LysR family transcriptional regulator	1.19806	0.780731	1.00907	0.850475	0.745043	1.36023	1.31485	1.0174	0.943912
MEXAM1_RS07895	cytosine deaminase	0.8985	1.01059	0.857298	1.02931	1.10434	1.42536	0.761639	0.701003	0.910799
MEXAM1_RS07900	hypothetical protein	4785.96	4866.23	4522.52	4105.43	4993.29	4279.19	4984.33	4638.47	4574.77
MEXAM1_RS07905	hypothetical protein	117.863	131.469	131.441	135.326	146.182	136.012	153.082	160.771	137.166
MEXAM1_RS07910	LysR family transcriptional regulator	0.685846	0.93521	0.604431	1.17272	0.791222	0.662068	0.442924	0.643193	0.561333
MEXAM1_RS07915	guanine deaminase	2.21721	2.76769	2.17735	2.19378	1.74461	2.18921	2.23825	2.55491	2.9607
MEXAM1_RS07920	aldehyde oxidase	2.63783	2.39375	2.5154	2.53469	2.0241	2.20972	1.93079	2.1336	2.14994
MEXAM1_RS07925	FAD-binding molybdopterin dehydrogenase	3.75981	3.55054	3.68663	3.20272	2.90108	2.67725	4.28229	3.55241	3.7113
MEXAM1_RS07930	nitrate ABC transporter substrate-binding protein	2.24802	2.981	2.47803	2.32507	2.94453	2.71515	2.55383	2.74261	2.36909
MEXAM1_RS07935	ABC transporter permease	0.710007	0.715239	1.28043	1.49369	1.17977	0.935203	0.74101	0.697563	0.96038
MEXAM1_RS07940	ABC transporter permease	0.563795	0.420394	0.465723	0.496111	0.474118	0.884148	0.455141	0.152609	0.209758
MEXAM1_RS07945	ABC transporter ATP-binding protein	1.9875	3.126	2.35596	2.3051	2.20187	2.2111	2.85264	2.26651	2.90146
MEXAM1_RS07950	FMN reductase	3.25718	3.43376	3.5654	4.04209	4.58907	3.11477	2.05903	2.97043	2.13758
MEXAM1_RS07955	aminoacrylate hydrolase	1.30232	1.10902	0.572759	1.48231	1.08184	1.3372	0.311585	0.755906	0.32319
MEXAM1_RS07960	aminoacrylate peracid reductase	2.59866	4.64942	4.52999	3.51892	3.30282	1.20777	1.16714	2.01533	2.43025
MEXAM1_RS07965	peroxyureidoacrylate/ureidoacrylate amidohydrolase RutB	2.42169	3.48912	3.17271	2.80491	3.03229	2.77675	3.40985	3.04707	2.77441
MEXAM1_RS07970	pyrimidine monooxygenase RutA	2.84234	3.26282	5.06536	3.08231	2.94939	3.54283	3.72534	4.27937	3.41471
MEXAM1_RS07975	transcriptional regulator	2.3652	2.4138	3.36957	1.42145	1.91729	2.26579	2.88735	3.81253	2.90869
MEXAM1_RS07980	ureidoglycolate lyase	1.50043	3.0218	1.22462	2.05488	3.00749	2.66663	1.21361	1.8259	1.82188
MEXAM1_RS07985	(S)-ureidoglycine aminohydrolase	2.979	2.07027	1.12155	1.7333	2.63354	3.17366	1.06897	1.81528	2.33393
MEXAM1_RS07990	cysteine desulfurase	1.84474	1.41632	1.88418	2.27716	2.04696	1.83161	1.98491	1.55274	1.85161
MEXAM1_RS07995	LysR family transcriptional regulator	1.01516	0.980552	1.19298	1.02114	1.49667	1.43748	1.11693	1.07377	1.10778
MEXAM1_RS08000	allantoinase PuuE	1.78557	1.55749	1.31529	1.60021	1.87798	1.46201	2.33373	2.32613	2.94953
MEXAM1_RS08005	hydroxyisourate hydrolase	12.4128	12.8733	13.3267	12.8605	10.6016	11.5491	18.3008	15.7775	18.8149
MEXAM1_RS08010	DUF808 domain-containing protein	9.57755	10.1263	7.88406	7.88588	7.66098	8.23295	10.0847	8.46249	9.99303
MEXAM1_RS08015	EAL domain-containing protein	4.09222	3.3274	3.26158	4.11792	4.48296	4.86616	3.02653	3.6723	3.51259
MEXAM1_RS08020	GGDEF domain-containing protein	2.62088	2.35347	2.69091	2.78004	3.41624	2.58334	3.72704	3.35954	3.62374
MEXAM1_RS08025	membrane protein	5.80454	6.31067	5.07131	4.41847	6.88024	7.01417	6.3285	5.49503	5.52601
MEXAM1_RS08030	IS481 family transposase	26.7113	26.7828	27.8057	24.1518	22.3769	20.0669	23.1084	21.3741	18.1875
MEXAM1_RS08035	hypothetical protein	2.42216	1.69507	3.87495	3.56651	3.33466	5.58862	5.80864	5.6979	6.6478
MEXAM1_RS08040	hypothetical protein	634.089	656.878	655.824	523.931	465.213	449.035	140.295	107.144	160.898
MEXAM1_RS08045	hypothetical protein	47.7579	66.296	58.3835	48.8023	72.3404	58.9039	88.2026	78.3327	80.3975
MEXAM1_RS08050	hypothetical protein	399.588	391.746	365.646	413.249	409.283	378.965	114.479	134.466	143.296
MEXAM1_RS08055	gamma-glutamyltransferase	17.684	17.161	16.1774	16.5807	15.5881	16.3541	17.2157	16.6911	16.453
MEXAM1_RS08060	aminoglycoside phosphotransferase family protein	53.9408	53.0123	63.4106	51.9893	57.8333	59.5875	88.6803	86.8797	77.6265
MEXAM1_RS08065	1-acyl-sn-glycerol-3-phosphate acyltransferase	5.80533	7.12512	5.25733	4.88775	5.07462	6.0007	5.45352	4.95301	5.21161
MEXAM1_RS08070	hypothetical protein	23.1107	20.4767	33.4488	25.7515	27.7181	26.0037	19.9139	23.4653	26.1532
MEXAM1_RS08075	methionine biosynthesis protein MetW	17.8975	17.4691	16.2906	15.7303	16.3999	14.7549	14.5881	14.6747	15.2944
MEXAM1_RS08080	homoserine O-acetyltransferase	26.9478	27.4213	26.6966	27.0551	32.298	29.6998	25.5918	25.7742	26.03
MEXAM1_RS08085	peptide-methionine (R)-S-oxide reductase	72.1329	79.0385	85.3163	70.0502	58.7623	60.0872	73.5823	81.7378	65.5175
MEXAM1_RS08090	peptide-methionine (S)-S-oxide reductase	69.5057	63.4126	73.6455	59.3311	50.7661	56.5393	50.3182	60.0138	54.392
MEXAM1_RS08095	bacterioferritin	88.3377	88.2683	83.2738	87.7992	76.7795	75.5544	70.5244	69.6651	72.4549
MEXAM1_RS08100	universal stress protein	20.1095	21.6251	23.9616	18.3224	21.1922	19.9008	21.2957	25.536	19.3378
MEXAM1_RS08105	acyltransferase	1.08547	2.12901	1.25743	2.07684	1.25516	1.52271	1.44065	1.32525	1.00908
MEXAM1_RS08110	DUF4142 domain-containing protein	739.15	875.954	871.571	966.089	844.71	827.592	144.961	131.176	136.784
MEXAM1_RS08115	radical SAM protein	3.12385	2.88618	3.10247	3.40848	2.50937	2.67049	2.24101	1.53198	1.50997
MEXAM1_RS08120	hypothetical protein	2.73393	2.17532	3.35301	4.60157	2.5859	3.24767	3.56185	4.07372	3.57317
MEXAM1_RS08125	hypothetical protein	58.5762	42.5015	32.1041	30.069	57.4111	42.6555	71.6305	40.6077	64.5472
MEXAM1_RS08130	50S ribosomal protein L33	657.888	688.198	681.114	578	653.197	560.681	525.37	492.085	693.15
MEXAM1_RS08135	3-methyl-2-oxobutanoate hydroxymethyltransferase	13.2742	15.0075	14.0739	13.4999	14.3574	14.031	16.1089	18.4077	17.4854
MEXAM1_RS08140	thioredoxin	9.86662	5.63206	4.44223	7.5281	7.06773	6.21874	6.40528	8.38177	10.7173
MEXAM1_RS08145	hypothetical protein	19.4931	17.6178	20.272	20.7338	17.884	19.0145	9.76406	14.2675	9.62586
MEXAM1_RS08150	quinoprotein dehydrogenase-associated SoxYZ-like carrier	14.3853	14.3414	15.5558	12.893	14.5838	13.7012	9.38584	8.82181	7.78764
MEXAM1_RS08155	MBL fold metallo-hydrolase	4.19599	5.47956	5.51754	5.0376	7.02782	4.70448	8.93542	8.24854	9.114
MEXAM1_RS08160	TetR/AcrR family transcriptional regulator	24.5446	19.6591	19.5883	21.2969	29.6271	23.9719	37.0927	38.3103	39.6757
MEXAM1_RS08165	hypothetical protein	18.6554	16.8867	19.7242	15.2962	21.1561	23.9725	30.47	31.2153	29.0324
MEXAM1_RS08170	DUF86 domain-containing protein	5.5283	4.64335	4.72652	2.53613	2.37374	5.79725	6.89269	6.90575	5.79285
MEXAM1_RS08175	GTP-binding protein	46.3354	52.1663	49.4162	47.0059	45.493	44.4664	25.4178	23.2513	24.9539
MEXAM1_RS08180	hypothetical protein	12271.1	11842.3	11741.7	11991	16364.2	12880.6	12809.1	10512.1	11669
MEXAM1_RS08185	polymerase	1.12738	0.696643	1.3317	0.823141	1.46462	1.09327	3.42962	2.50071	3.09196
MEXAM1_RS08190	hybrid sensor histidine kinase/response regulator	2.35698	2.20214	2.52948	1.84547	2.21445	1.96439	2.1969	2.21553	2.26485
MEXAM1_RS08195	hypothetical protein	6.11915	5.6487	5.52875	4.50141	6.6924	4.06821	4.91337	4.64811	4.49124
MEXAM1_RS08200	TIGR01620 family protein	9.56315	8.81565	9.22649	9.62573	13.4075	8.83965	6.08937	5.33183	5.11274
MEXAM1_RS08205	hypothetical protein	341.261	331.555	362.877	391.387	376.34	364.694	127.683	141.708	129.374
MEXAM1_RS08210	serine hydrolase family protein	19.9897	19.7201	20.1515	22.4231	24.6477	21.1006	19.6678	22.2182	22.2632
MEXAM1_RS08215	diaminopimelate decarboxylase	3.85064	5.2946	4.70244	4.2457	6.0329	5.48595	8.90378	9.27888	8.89176
MEXAM1_RS08220	hypothetical protein	65.4293	70.9847	69.2706	69.4013	98.7242	72.1808	176.108	173.042	160.916
MEXAM1_RS08225	hypothetical protein	254.645	234.946	260.288	197.587	272.831	225.946	418.189	418.559	454.824
MEXAM1_RS08230	hypothetical protein	17.1899	17.2117	19.4279	15.4189	17.406	18.1627	16.9148	17.3929	18.0772
MEXAM1_RS08235	DUF1134 domain-containing protein	7.93876	9.42896	9.52213	7.19087	12.0037	9.64649	44.5319	42.9462	44.9117
MEXAM1_RS08240	ribonuclease HII	3.12087	3.04772	3.42105	2.89518	3.52899	4.54176	3.56899	4.06184	2.412
MEXAM1_RS08245	glycosyltransferase family 1 protein	1.06123	1.19068	0.677722	0.95604	1.34518	1.4046	1.04185	1.16384	1.16314
MEXAM1_RS08250	UDP-2,3-diacylglucosamine diphosphatase	11.6685	11.1984	12.3837	11.393	10.4045	10.6865	15.9235	13.2756	12.3559
MEXAM1_RS08255	serine--glyoxylate aminotransferase	535.507	500.313	527.398	453.48	334.401	397.816	424.343	412.634	341.365
MEXAM1_RS08260	glycerate dehydrogenase	97.096	82.6432	90.7912	81.6206	62.9333	69.9986	56.8816	59.1632	52.8929
MEXAM1_RS08265	bifunctional NADP-dependent methylenetetrahydromethanopterin dehydrogenase/methylenetetrahydrofolate dehydrogenase, MtdA	161.814	153.193	155.697	138.861	106.313	124.466	100.902	107.322	90.4148
MEXAM1_RS08270	methenyltetrahydrofolate cyclohydrolase	80.3103	73.5229	63.1865	57.7588	45.2424	52.0394	41.3392	48.1018	38.6927
MEXAM1_RS08275	malate--CoA ligase subunit beta	54.1797	48.0886	50.6343	43.1384	31.9831	38.3086	45.5777	44.9228	36.7166
MEXAM1_RS08280	malate--CoA ligase subunit alpha	59.9405	54.8867	55.0457	46.2733	40.3351	43.6342	59.0076	64.334	43.8524
MEXAM1_RS08285	phosphoenolpyruvate carboxylase	10.3558	9.64174	10.0091	7.7059	7.14688	7.72483	8.30431	9.57671	7.59736
MEXAM1_RS08290	CoA ester lyase	87.1988	77.6443	97.0212	74.1434	72.1826	71.2453	52.6873	48.1629	40.6384
MEXAM1_RS08295	DUF1003 domain-containing protein	6.00404	7.34032	7.36171	3.80518	5.14495	5.3086	2.84075	2.4899	4.04247
MEXAM1_RS08300	carboxymethylenebutenolidase	15.5858	16.4897	19.1121	17.9718	15.5386	15.9596	11.5028	10.8351	11.6536
MEXAM1_RS08305	4a-hydroxytetrahydrobiopterin dehydratase	153.902	161.789	166.233	118.435	138.831	127.557	100.84	103.467	88.5178
MEXAM1_RS08310	ABC transporter substrate-binding protein	0.74329	1.26729	1.29736	1.68305	1.54992	2.21461	1.3777	1.82822	1.84308
MEXAM1_RS08315	NA	0.572757	0.162526	0.31459	0.383221	0.639589	0.0917688	0.411154	0.83338	0.284366
MEXAM1_RS08320	ABC transporter ATP-binding protein	1.05985	1.50413	1.84476	2.74937	2.03123	3.31495	1.71165	0.897511	2.49878
MEXAM1_RS08325	PQQ-dependent dehydrogenase, methanol/ethanol family, XoxF1	30.0845	33.8551	31.4073	28.5922	29.2208	28.5249	13.2001	14.2166	12.0479
MEXAM1_RS08330	c-type cytochrome, methanol metabolism-related	16.169	17.2384	17.5506	15.6489	15.009	15.3307	16.5669	17.8508	15.6181
MEXAM1_RS08335	quinoprotein dehydrogenase-associated putative ABC transporter substrate-binding protein	4.3572	4.29825	4.88019	4.53336	3.96337	4.4959	3.51095	2.92988	4.03928
MEXAM1_RS08340	2-amino-4-hydroxy-6-hydroxymethyldihydropteridine pyrophosphokinase	4.51157	3.64823	5.12276	3.26306	2.12174	3.48859	4.27551	6.32916	5.82426
MEXAM1_RS08345	dihydroneopterin aldolase	3.89799	4.10243	3.83307	5.43833	1.80154	3.62332	5.83571	4.03066	4.61747
MEXAM1_RS08350	dihydropteroate synthase	10.2927	10.8031	8.6218	9.37262	9.88545	10.2864	10.0625	8.57106	9.76895
MEXAM1_RS08355	hypothetical protein	32.3326	31.4678	32.8185	46.0927	41.6481	41.8967	28.6475	32.1321	25.0922
MEXAM1_RS08360	hypothetical protein	9.06865	11.7019	12.0593	10.7302	12.9745	12.0217	9.38802	9.09773	11.0192
MEXAM1_RS08365	coenzyme PQQ synthesis protein E	26.2271	26.9382	27.5371	24.6189	27.1553	23.4105	21.5966	18.6335	19.2374
MEXAM1_RS08370	bifunctional pyrroloquinoline quinone biosynthesis protein PqqCD	26.8387	29.0522	31.314	29.3306	31.6547	28.3866	16.9283	19.1917	19.4059
MEXAM1_RS08375	pyrroloquinoline quinone biosynthesis protein PqqB	21.196	20.729	23.1087	23.246	19.822	19.0119	21.1818	18.3326	20.5356
MEXAM1_RS08380	pyrroloquinoline quinone precursor peptide PqqA	1232.8	1488.39	1441.1	1400.04	1619.66	1658.32	561.471	312.548	394.696
MEXAM1_RS08385	DNA-binding response regulator	23.1558	25.9897	25.9779	22.2153	23.4014	24.7674	32.2325	31.3219	35.3259
MEXAM1_RS08390	two-component sensor histidine kinase	7.84334	9.70151	10.0685	7.64379	8.00156	8.09648	5.88731	5.97555	5.55736
MEXAM1_RS08395	hypothetical protein	25.1327	27.3272	13.1649	12.0985	8.69003	23.5604	13.315	24.4963	24.2251
MEXAM1_RS08400	formyltransferase/hydrolase complex Fhc subunit C	19.4196	19.7028	19.0357	20.1855	16.9207	19.4327	15.6955	14.9972	12.8224
MEXAM1_RS08405	formyltransferase/hydrolase complex subunit D	18.3948	18.6638	20.415	17.6224	15.9383	17.9555	12.0872	13.605	11.5304
MEXAM1_RS08410	formyltransferase/hydrolase complex Fhc subunit A	16.0807	15.7831	18.3646	14.523	14.4317	15.9287	12.5274	12.8862	11.2638
MEXAM1_RS08415	formyltransferase/hydrolase complex Fhc subunit B	12.9924	14.6	17.4908	13.1934	13.4197	16.6686	10.7428	10.2822	11.2595
MEXAM1_RS08420	beta-ribofuranosylaminobenzene 5'-phosphate synthase	4.35104	5.71401	5.84273	5.03067	5.10664	5.8293	5.29336	6.01337	4.82024
MEXAM1_RS08425	NAD(P)-dependent methylenetetrahydromethanopterin dehydrogenase, MtdB	15.5791	16.3953	20.9515	13.9329	16.8321	18.0102	41.7301	43.4964	38.8386
MEXAM1_RS08430	tetrahydromethanopterin C1 transfer protein	3.85297	3.37592	4.77562	4.30567	3.81539	3.57519	4.24081	5.07696	5.0241
MEXAM1_RS08435	methenyltetrahydromethanopterin cyclohydrolase	14.9138	17.6777	18.5534	16.101	18.0432	15.829	12.8594	14.017	12.4758
MEXAM1_RS08440	RimK family alpha-L-glutamate ligase	5.14423	4.7394	3.98181	3.70551	5.01158	4.76389	5.18786	5.76879	5.48288
MEXAM1_RS08445	triphosphoribosyl-dephospho-CoA synthase	0.969599	0.571928	1.23169	1.27468	1.21777	1.79832	0.909907	1.50937	1.38763
MEXAM1_RS08450	5,6,7,8-tetrahydromethanopterin hydro-lyase	3817.52	3847.21	4108.69	3314.84	3340.95	3158.52	2196.3	2249.6	2179.01
MEXAM1_RS08455	nickel transporter	2.07709	2.91647	1.70984	3.22893	2.08475	2.79201	3.2807	2.27271	2.32103
MEXAM1_RS08460	H4MPT-linked C1 transfer pathway protein	4.41396	4.11458	4.9972	4.26545	3.74013	3.07245	4.22245	4.61363	3.85223
MEXAM1_RS08465	hypothetical protein	150.359	173.516	170.181	202.363	265.886	219.778	74.6463	65.1437	72.5112
MEXAM1_RS08470	YncE family protein	20.5155	23.9282	23.8912	22.1347	17.52	17.5899	6.15197	6.31442	6.70031
MEXAM1_RS08475	SRPBCC family protein	310.027	338.434	324.858	291.05	289.925	283.727	71.1885	69.1162	73.2143
MEXAM1_RS08480	SRPBCC family protein	24.5108	22.4999	20.4536	17.337	19.354	20.896	9.29885	11.1634	10.4525
MEXAM1_RS08485	DUF447 domain-containing protein	12.433	14.5466	15.2144	15.3825	13.7377	13.417	9.31623	8.07135	8.67512
MEXAM1_RS08490	hypothetical protein	7.52068	6.38905	6.46647	5.68913	7.03435	6.79089	4.39498	3.62876	5.22727
MEXAM1_RS08495	hypothetical protein	1.77878	2.05256	1.25217	1.14467	1.93617	0.24312	1.36894	1.49366	1.13687
MEXAM1_RS08500	hypothetical protein	3.71684	6.49805	5.62517	4.93828	4.13132	3.47403	3.82235	4.39205	4.63927
MEXAM1_RS08505	DUF2380 domain-containing protein	8.01567	9.44414	10.7091	12.5709	9.76004	9.3388	7.05453	5.35069	5.37419
MEXAM1_RS08510	ABC transporter substrate-binding protein	2.5822	2.08692	3.15164	2.73916	3.62849	3.29157	5.78421	5.41809	5.35526
MEXAM1_RS08515	membrane protein	20.4402	19.0279	18.246	20.7583	16.7129	17.8714	6.65813	6.18529	7.183
MEXAM1_RS08520	hypothetical protein	29.7199	26.3899	30.4903	30.1978	21.4036	21.7492	11.4124	10.3755	14.8718
MEXAM1_RS08525	hypothetical protein	35.3422	34.7509	32.656	48.7323	28.4547	43.5155	13.5524	19.6969	24.4748
MEXAM1_RS08530	2-phenylethanol ABC transporter ATP-binding protein	6.85093	8.35509	8.03697	7.43499	6.73779	7.21223	3.58862	3.56649	4.68796
MEXAM1_RS08535	multidrug ABC transporter permease	7.96904	7.5859	7.03653	9.09611	6.55347	7.96606	5.30642	3.94008	4.64782
MEXAM1_RS08540	hypothetical protein	15.4951	16.2899	16.0402	21.0156	16.8627	17.4064	9.02568	9.84554	10.9148
MEXAM1_RS08545	TonB-dependent receptor	4.34544	3.60703	4.11418	3.62946	4.44663	4.10754	10.3523	9.49507	9.21668
MEXAM1_RS08550	calcium-binding protein	50.5053	59.0888	48.3438	43.4624	75.1472	57.6118	46.6463	34.9863	53.1463
MEXAM1_RS08555	hypothetical protein	1248.8	1246.77	1285.13	1290.06	1141.24	988.971	194.317	187.949	160.664
MEXAM1_RS08560	undecaprenyl-phosphate glucose phosphotransferase	6.31843	6.59759	6.36029	6.40824	6.99439	5.41138	9.56956	7.18236	9.57581
MEXAM1_RS08565	glycosyltransferase family 1 protein	1.82826	2.18352	1.76648	2.30295	4.18992	2.47951	12.8849	10.8362	13.355
MEXAM1_RS08570	sugar transporter	2.11591	2.03783	2.77629	3.52598	3.21742	4.17487	9.22249	6.97497	7.99829
MEXAM1_RS08575	LPS biosynthesis protein	9.21937	9.76418	8.53275	11.2872	13.0159	12.36	22.5958	23.8839	22.7457
MEXAM1_RS08580	nucleoid-associated protein, YbaB/EbfC family	234.515	204.122	216.631	191.2	228.124	204.582	184.839	196.917	207.673
MEXAM1_RS08585	DNA polymerase III subunit gamma/tau	5.14598	4.56222	4.41029	4.53688	5.25335	4.99843	5.21109	4.2904	4.62217
MEXAM1_RS08590	hypothetical protein	25.5029	22.9382	22.017	24.4168	20.3608	18.4317	15.5383	20.3073	20.368
MEXAM1_RS08595	PepSY domain-containing protein	600.341	652.836	647.323	587.402	546.645	522.835	218.991	207.842	196.825
MEXAM1_RS08600	ATP-binding protein	2.29072	1.58844	1.93864	1.44392	1.72968	1.56267	1.33488	0.920082	1.14391
MEXAM1_RS08605	glutathione S-transferase family protein	1.67947	2.85581	1.69718	2.97399	2.46013	2.47133	2.04166	1.89974	1.92682
MEXAM1_RS08610	hypothetical protein	4.38803	4.49143	4.46715	4.32253	4.32617	3.91834	3.88224	5.06848	4.38663
MEXAM1_RS08615	hybrid sensor histidine kinase/response regulator	1.94541	1.83649	2.51498	2.08629	1.87854	2.16668	2.01886	1.42116	2.24621
MEXAM1_RS08620	hypothetical protein	23.849	24.7998	37.4126	36.1279	31.6263	32.3574	56.968	64.888	63.9651
MEXAM1_RS08625	transglutaminase	17.252	15.7118	17.4663	16.1835	17.7404	18.0324	28.5065	25.2212	23.9796
MEXAM1_RS08630	acyl-CoA thioesterase	8.76818	12.2604	10.0449	12.7352	15.813	11.2824	22.0745	18.6994	17.2137
MEXAM1_RS08635	alpha/beta hydrolase	7.32933	5.52517	5.82154	6.87468	4.80891	5.71296	9.40626	7.93568	10.4355
MEXAM1_RS08640	lytic transglycosylase	3.2629	3.36019	2.7709	3.82903	2.94109	3.60945	1.70721	1.56892	2.63001
MEXAM1_RS08645	molybdopterin oxidoreductase family protein	3.60522	3.66967	3.80512	3.10932	2.40458	3.36498	2.49965	2.9895	2.48341
MEXAM1_RS08650	ABC transporter ATP-binding protein	4.14802	4.02586	4.14242	3.3744	4.04297	4.22067	3.98254	4.01002	3.60486
MEXAM1_RS08655	phosphopentomutase	4.7072	4.58312	5.87929	5.31767	3.94457	5.43359	4.53631	4.42985	5.30297
MEXAM1_RS08660	energy-dependent translational throttle protein EttA	25.5794	28.6248	26.2114	26.4343	32.5872	30.094	33.1061	34.9024	35.6011
MEXAM1_RS08665	hypothetical protein	22.6552	10.5763	10.5652	15.0627	16.7381	10.8789	15.4885	21.8073	25.1547
MEXAM1_RS08670	DNA/RNA non-specific endonuclease	2.082	1.59059	1.97655	1.44383	1.93155	1.10832	2.00923	1.81451	2.45747
MEXAM1_RS08675	hypothetical protein	27.8973	30.1492	23.4239	27.5484	31.7659	20.8139	31.2571	25.36	29.7547
MEXAM1_RS08680	1-deoxy-D-xylulose-5-phosphate synthase	58.9849	62.0266	62.9923	50.4302	54.2171	55.2237	76.7411	71.8469	70.7448
MEXAM1_RS08685	NAD-dependent dehydratase	6.72777	7.56328	6.69624	6.712	5.67487	5.58268	10.6791	9.46514	10.7615
MEXAM1_RS08690	squalene synthase HpnC	4.83668	5.75807	5.71843	4.00546	4.10111	5.21626	5.1551	7.80548	5.98073
MEXAM1_RS08695	squalene synthase HpnD	12.6761	11.781	8.96327	8.72573	8.03941	8.74001	14.2244	13.0576	10.6349
MEXAM1_RS08700	FAD-binding protein	7.54683	8.94662	8.18971	8.18108	8.17386	6.84517	9.75659	9.32858	9.78603
MEXAM1_RS08705	squalene--hopene cyclase	42.2723	43.5438	44.5044	34.2555	41.2507	40.5619	41.8513	36.6469	42.6796
MEXAM1_RS08710	spermidine synthase	5.64009	4.42189	4.12399	4.32298	3.80151	4.66721	4.20847	3.96103	5.27387
MEXAM1_RS08715	8-amino-7-oxononanoate synthase	18.8052	15.2048	14.6064	10.4722	9.79361	10.3888	24.5324	22.818	20.5417
MEXAM1_RS08720	type I polyketide synthase	11.3001	9.28233	9.67516	7.00683	7.02445	7.32537	15.2886	13.5925	13.6612
MEXAM1_RS08725	UDP-glucose/GDP-mannose dehydrogenase family protein	8.05714	9.03999	7.28297	7.47227	6.55768	7.01905	10.51	10.5838	9.90686
MEXAM1_RS08730	glycosyltransferase family 2 protein	3.1237	3.45294	3.64463	3.1045	2.74341	3.76562	3.28181	2.60155	2.68062
MEXAM1_RS08735	hypothetical protein	5.39062	5.4858	6.20064	4.60978	4.40983	4.81989	4.86556	4.08423	5.30286
MEXAM1_RS08740	tRNA-Val	71.5147	136.783	81.2283	95.2561	78.6931	121.214	74.7052	25.8326	38.6134
MEXAM1_RS08750	hypothetical protein	17.5509	12.2676	14.925	15.6669	14.1393	19.8287	16.4073	14.8544	19.1279
MEXAM1_RS08755	hypothetical protein	32.6582	29.3276	33.5243	35.1534	29.0832	32.8317	16.7682	14.5563	19.1007
MEXAM1_RS08760	hypothetical protein	167.523	153.069	149.493	167.005	132.417	128.741	118.122	113.991	104.044
MEXAM1_RS08765	DUF1738 domain-containing protein	177.195	155.287	151.231	163.916	131.351	140.266	128.352	136.866	131.213
MEXAM1_RS08770	response regulator	515.869	457.498	425.652	484.359	408.074	404.301	661.793	755.913	644.809
MEXAM1_RS08775	DNA-binding response regulator	21.6625	32.9857	37.4031	24.7348	30.9975	31.2481	12.7955	15.266	18.2278
MEXAM1_RS08780	PAS domain-containing sensor histidine kinase	24.4675	24.0047	25.6973	27.1367	29.1956	27.358	17.8572	18.0865	18.1855
MEXAM1_RS08785	hypothetical protein	22.9938	20.3536	17.862	21.3687	19.4112	21.06	18.0838	15.0378	15.8325
MEXAM1_RS08790	oxidoreductase	107.467	109.477	103.494	108.008	92.9356	91.733	74.3361	80.8007	75.9508
MEXAM1_RS08795	iron reductase	42.8737	40.1033	44.1846	38.6486	35.5855	35.8399	24.6825	20.6356	19.659
MEXAM1_RS08800	class III cytochrome C family protein	62.3487	58.7005	55.5119	55.8215	52.43	55.5289	36.9992	34.862	33.8668
MEXAM1_RS08805	MucR family transcriptional regulator	210.661	202.224	212.508	206.415	171.636	169.731	113.514	129.697	116.62
MEXAM1_RS08820	hypothetical protein	4854.01	4783.09	4809.93	4465.47	4000.07	3950.65	3405.7	3347.18	3174.96
MEXAM1_RS08825	1,4-alpha-glucan branching protein GlgB	76.432	73.3188	73.1209	72.722	66.6104	65.4698	63.4167	64.0397	57.5151
MEXAM1_RS08830	glycogen synthase GlgA	41.4829	38.9854	39.5109	37.4379	34.3208	37.1941	26.1093	26.2586	24.6165
MEXAM1_RS08835	hypothetical protein	3456.05	3303.27	3128.07	2911.92	2314.12	2412.48	2403.25	2537.82	2270.32
MEXAM1_RS08840	DUF1622 domain-containing protein	383.13	365.964	323.204	311.381	258.864	249.027	356.75	366.695	312.152
MEXAM1_RS08845	copper resistance protein CopA	420.537	384.69	390.759	357.673	307.03	307.96	355.278	315.793	299.287
MEXAM1_RS08850	copper resistance protein B	345.638	315.277	308.492	297.238	253.945	245.745	236.578	224.447	220.745
MEXAM1_RS08855	DUF305 domain-containing protein	7790.54	7615.27	7582.25	7817.24	6549.2	6474.46	4297.37	4614.06	4196.48
MEXAM1_RS08860	glycosyl hydrolase	252.835	250.96	237.47	226.771	201.823	191.235	216.692	216.64	202.6
MEXAM1_RS08865	hypothetical protein	38096.3	36116	37275.3	33481.5	30300	30618.5	29485.9	27530.1	26150.8
MEXAM1_RS08870	hypothetical protein	10682.5	10184.3	9735.61	9173.33	8315.4	8044.43	11830.3	12854.3	10608.7
MEXAM1_RS08875	transketolase	151.455	140.44	138.31	135.396	106.564	109.99	118.904	122.497	114.372
MEXAM1_RS08880	transaldolase	174.309	161.159	153.041	151.042	120.535	126.265	101.446	102.878	97.0331
MEXAM1_RS08885	6-phosphogluconate dehydrogenase (decarboxylating)	186.299	172.766	172.387	159.921	133.881	132.289	119.202	119.509	109.387
MEXAM1_RS08890	glucose-6-phosphate dehydrogenase	109.333	99.3775	92.7644	91.5199	72.935	76.0415	60.6972	58.1924	55.477
MEXAM1_RS08895	Cof-type HAD-IIB family hydrolase	164.427	149.918	147.331	138.306	110.901	111.808	83.2752	82.8107	79.3633
MEXAM1_RS08900	6-phosphogluconolactonase	114.889	108.023	108.421	99.049	75.0071	84.1644	57.5819	58.2584	55.2699
MEXAM1_RS08905	carbohydrate kinase	102.588	86.0401	92.4358	81.3916	61.4688	69.0301	46.627	45.9155	42.1186
MEXAM1_RS08910	hydrolase	52.9927	44.9411	50.4212	40.0564	30.247	34.0848	22.2488	23.1572	24.6426
MEXAM1_RS08915	hypothetical protein	24.8748	21.0844	23.8686	21.3024	15.9555	20.5909	11.3975	12.8236	12.2774
MEXAM1_RS08920	hypothetical protein	0.723441	4.85582	7.64664	8.4743	10.5857	9.29314	7.25814	7.42166	6.48188
MEXAM1_RS08925	hypothetical protein	4.39389	3.88205	3.7874	4.56056	2.76528	3.99424	5.13365	3.97051	2.0517
MEXAM1_RS08930	hypothetical protein	3.81882	3.09263	4.09381	4.02038	4.28088	4.74735	2.74125	1.96367	2.63569
MEXAM1_RS08935	hypothetical protein	1.02536	1.56353	2.45001	0.815764	3.08617	2.13192	1.76918	2.62428	2.14578
MEXAM1_RS08940	type VI secretion protein	2.08192	2.08249	2.15821	2.46125	2.51658	2.49455	1.60975	1.36908	1.49887
MEXAM1_RS08945	hypothetical protein	4.57222	5.10549	7.44746	5.99262	5.27613	4.90881	6.27581	6.41996	5.5924
MEXAM1_RS08950	IS3 family transposase	13.3737	11.4706	11.9703	12.7556	11.0748	11.7578	9.66975	10.11	10.0734
MEXAM1_RS08960	DUF1738 domain-containing protein	1.18806	1.01205	1.56881	3.74094	2.58436	3.58769	1.47791	1.94914	2.12227
MEXAM1_RS08965	hypothetical protein	6.64497	7.4282	6.66944	9.5962	8.84265	10.3206	6.6769	7.58436	6.05949
MEXAM1_RS08970	PIN domain-containing protein	46.605	46.5162	48.3353	50.7354	41.3502	55.5505	31.2637	34.8873	33.7659
MEXAM1_RS08975	prevent-host-death family protein	350.757	366.013	351.893	390.478	359.538	359.971	279.403	287.805	243.203
MEXAM1_RS08980	hypothetical protein	24.9345	25.9642	21.2343	26.9534	26.3429	23.6404	20.8321	24.0174	21.084
MEXAM1_RS08985	recombinase family protein	38.4384	32.1913	28.5837	40.2549	37.468	33.1012	45.7934	48.8758	43.1708
MEXAM1_RS08990	isoprenylcysteine carboxylmethyltransferase family protein	1156.45	1131.8	1105.45	1165.23	1047.16	1044.03	1187.33	1181.6	1123.91
MEXAM1_RS08995	copper-translocating P-type ATPase	422.163	396.203	394.958	404.975	341.602	347.92	339.088	342.832	326.282
MEXAM1_RS09000	DUF3141 domain-containing protein	170.289	170.126	160.934	154.395	132.907	128.302	94.2361	88.5793	95.2302
MEXAM1_RS09005	acetate/propionate family kinase	137.885	134.073	126.419	128.478	106.384	109.126	68.9933	63.1589	68.5159
MEXAM1_RS09010	phosphate acetyltransferase	102.891	101.388	94.6456	94.7357	77.2927	79.2974	42.9689	41.3977	45.1354
MEXAM1_RS09015	hypothetical protein	96.5606	86.6371	70.7084	83.9084	65.1179	69.6717	37.5158	36.2317	43.7911
MEXAM1_RS09020	IS3 family transposase	13.3737	11.4706	11.9703	12.7556	11.0748	11.7578	9.66975	10.11	10.0734
MEXAM1_RS09030	ferredoxin	222.67	211.1	205.579	233.029	193.174	185.699	161.864	167.967	153.977
MEXAM1_RS09035	IS481 family transposase	26.7113	26.7828	27.8057	24.1518	22.3769	20.0669	23.1084	21.3741	18.1875
MEXAM1_RS09040	hypothetical protein	41635.7	37593.6	36481.8	34575.3	27858.2	28470	29354	30092.7	26398
MEXAM1_RS09045	ATPase	4.22651	3.5161	4.64257	4.24161	4.41278	2.77004	2.82716	2.51626	3.29075
MEXAM1_RS09050	IS21 family transposase	1.69793	2.20504	1.67266	1.45171	1.49809	1.9335	1.66786	1.6347	1.81074
MEXAM1_RS09055	ISL3 family transposase ISMex26	3.94346	3.52427	3.1543	3.35528	3.55547	3.68961	2.22741	2.20342	2.71144
MEXAM1_RS09060	hypothetical protein	7.22973	7.9385	8.5762	9.22882	11.6937	10.3329	12.0718	11.3871	11.1727
MEXAM1_RS09065	copper resistance protein B	7.21141	5.99506	7.0801	7.24301	5.10262	5.95117	5.42245	6.60045	7.28606
MEXAM1_RS09070	hypothetical protein	58366.1	56726.3	57237.9	57237.8	49317.7	48067.6	42344.7	44273.9	38514.9
MEXAM1_RS09075	hypothetical protein	2915.14	2936.63	2854.16	2905.44	2364.07	2375.79	2665.31	2988.63	2463.83
MEXAM1_RS09080	copper oxidase	937.97	906.857	903.815	848.54	762.07	769.679	856.573	877.042	800.488
MEXAM1_RS09085	hypothetical protein	7087.08	6713.16	6510.4	6457.01	5298.17	5271.51	4061.16	4517.97	4040.98
MEXAM1_RS09090	amylo-alpha-1,6-glucosidase	356.548	357.04	344.955	352.688	288.143	299.181	228.896	238.757	224.725
MEXAM1_RS09095	hypothetical protein	44.5465	46.4556	58.4377	59.5128	52.9357	55.9924	60.2488	84.7968	62.0386
MEXAM1_RS09100	ParA family protein	6.34939	4.26431	5.00873	5.58214	6.06196	7.69174	10.1578	10.1806	8.38347
MEXAM1_RS09105	DNA methyltransferase	3.47862	5.18722	4.38918	4.29928	5.43097	5.17387	5.56461	6.49064	5.01539
MEXAM1_RS09110	hypothetical protein	4.72081	5.0442	6.49873	3.51566	5.30835	5.79585	6.25935	6.74666	6.13608
MEXAM1_RS09115	NA	0.425255	0.720293	0.461465	1.05655	1.39832	0.401427	0.917158	0.80197	0.476823
MEXAM1_RS09120	transcriptional regulator	6.90697	12.5285	9.08786	9.92187	8.31204	3.22656	16.3029	9.52914	4.8911
MEXAM1_RS09125	integrase	9.59257	13.2122	12.686	9.49528	10.3401	11.6726	11.4163	10.7439	10.9688
MEXAM1_RS09130	oxalate/formate MFS antiporter	8.36052	9.31009	9.86542	9.18012	8.53691	7.76006	16.4128	15.8133	13.9361
MEXAM1_RS09135	ethanolamine ammonia-lyase subunit EutB	4.80644	4.76152	4.72518	5.17401	5.34978	5.13354	7.01184	6.58337	7.2973
MEXAM1_RS09140	ethanolamine ammonia-lyase subunit EutC	2.46211	3.54292	3.26781	2.55837	2.68627	3.59711	3.47336	3.75522	3.98183
MEXAM1_RS09145	dihydroxy-acid dehydratase	6.57131	5.79548	6.02738	6.03296	7.31999	7.58956	18.8955	15.389	15.0898
MEXAM1_RS09150	sel1 repeat family protein	6.59488	6.97804	7.74092	6.26674	6.89315	9.50873	17.6819	14.0282	15.4776
MEXAM1_RS09155	exodeoxyribonuclease III	2.71681	2.74757	2.52088	2.8142	1.70945	2.77959	3.22961	3.38585	4.42425
MEXAM1_RS09160	hypothetical protein	2.59978	2.11534	1.48731	2.26544	2.37354	1.95065	1.2986	1.81913	1.43194
MEXAM1_RS09165	propionyl-CoA synthetase	8.30702	9.71369	9.58473	7.88572	8.33165	8.09653	5.05277	5.15481	5.07244
MEXAM1_RS09170	DUF465 domain-containing protein	178.444	160.273	170.068	158.352	231.508	181.175	172.925	177.068	188.119
MEXAM1_RS09175	5-(carboxyamino)imidazole ribonucleotide mutase	11.6283	17.4946	15.1036	14.5709	13.2684	13.6887	11.0574	13.3431	14.4349
MEXAM1_RS09180	5-(carboxyamino)imidazole ribonucleotide synthase	3.42507	4.15312	3.48378	3.77263	3.71342	4.0389	5.37501	6.91652	6.04949
MEXAM1_RS09185	tetratricopeptide repeat protein	13.4725	11.4783	13.4142	11.3364	10.6114	12.6993	37.5872	32.8883	33.3466
MEXAM1_RS09190	fructose-bisphosphatase class II	27.9973	26.0322	28.2005	21.6303	27.4217	25.9768	31.1095	32.5067	30.8715
MEXAM1_RS09195	homoserine dehydrogenase	12.0445	11.8542	11.8783	10.9261	11.7935	11.8811	14.1933	14.4381	13.1114
MEXAM1_RS09200	hypothetical protein	196.776	179.665	240.869	101.692	116.443	142.052	419.417	387.639	409.979
MEXAM1_RS09205	hypothetical protein	20.3352	20.3938	18.9449	15.3947	18.6588	17.3357	28.4584	25.298	25.8995
MEXAM1_RS09210	hypothetical protein	81.3127	87.5032	82.6319	76.0585	73.7921	74.9857	40.2457	49.9955	37.7566
MEXAM1_RS09215	nucleoside transporter	0.599541	1.33763	1.37494	1.16182	0.845482	0.93814	0.893211	1.22237	1.16583
MEXAM1_RS09220	methyltransferase	1.12207	1.33633	0.738282	1.23697	0.535569	1.39877	1.61137	1.14886	1.08698
MEXAM1_RS09225	hypothetical protein	2.03469	5.11545	3.24451	4.47337	4.64516	7.01115	1.83176	4.82399	4.19331
MEXAM1_RS09230	glycosyltransferase family 1 protein	1.23281	1.44572	1.75733	1.70739	1.33707	1.64067	1.47399	1.17942	1.7953
MEXAM1_RS09235	DNA topoisomerase I	50.7251	48.9705	49.1508	49.25	40.9347	42.9255	13.9364	14.5176	13.509
MEXAM1_RS09240	chemotaxis sensory transducer	3.93554	4.52134	6.15079	4.56842	4.63476	4.65327	1.41171	1.29559	1.86996
MEXAM1_RS09245	cytochrome ubiquinol oxidase subunit I	31.622	31.1709	28.2498	27.4529	23.6248	24.5602	13.0579	15.3916	12.562
MEXAM1_RS09250	DNA-binding response regulator	13.853	13.7694	14.3211	16.7376	14.2149	13.4035	9.51003	8.18055	10.3944
MEXAM1_RS09255	diguanylate cyclase response regulator	5.28796	5.41944	3.85614	5.46114	6.66064	5.24028	4.51251	4.90165	4.62612
MEXAM1_RS09260	hypothetical protein	107.875	101.832	103.429	127.389	122.439	108.567	71.9486	64.6986	61.3742
MEXAM1_RS09265	hypothetical protein	1081.7	1041.37	982.588	1258.72	1229.94	1073.3	675.916	761.056	648.789
MEXAM1_RS09270	iron permease FTR1	152.223	153.542	168.726	135.128	131.102	143.476	148.959	153.764	127.525
MEXAM1_RS09275	low molecular weight phosphatase family protein	25.5629	24.2951	20.7626	24.3838	22.6678	24.7404	25.8504	29.5945	26.2532
MEXAM1_RS09280	UPF0262 family protein	15.885	12.0486	12.7149	14.1605	11.6725	13.4943	12.511	12.7084	11.8628
MEXAM1_RS09285	histidinol dehydrogenase	15.5335	18.1465	15.6934	14.499	18.5707	16.719	11.6487	12.7634	14.698
MEXAM1_RS09290	DUF2948 domain-containing protein	46.1403	49.9497	46.803	48.4873	56.4011	52.1935	43.4195	44.7098	40.7527
MEXAM1_RS09295	hypothetical protein	213.762	189.326	180.882	175.346	192.481	168.424	252.095	271.101	292.596
MEXAM1_RS09300	UDP-N-acetylglucosamine 1-carboxyvinyltransferase	26.2756	27.4906	27.548	23.3053	22.7042	23.2658	34.0977	30.9515	34.12
MEXAM1_RS09305	5-aminolevulinate synthase	14.5052	15.523	14.5934	20.0153	27.5869	22.5083	35.368	39.1731	46.4136
MEXAM1_RS09310	hypothetical protein	7.3654	9.53776	12.2168	12.0501	10.779	11.2394	5.60626	5.88942	7.93413
MEXAM1_RS09315	DUF2059 domain-containing protein	17.8122	18.8792	19.1232	23.5722	23.3981	22.6374	11.1586	9.58475	13.1792
MEXAM1_RS09320	PhnA protein	36.0664	37.6604	46.7194	41.8146	50.3512	44.9131	26.8327	17.7434	22.9041
MEXAM1_RS09325	MBL fold metallo-hydrolase	3.74622	4.25203	5.59219	4.62721	6.1595	6.0941	3.44776	2.30658	2.21768
MEXAM1_RS09330	helix-turn-helix transcriptional regulator	8.3087	7.30132	8.05879	7.50725	7.04033	7.21441	8.45293	10.1858	8.76206
MEXAM1_RS09335	3-deoxy-7-phosphoheptulonate synthase class II	144.682	146.738	150.486	135.181	124.461	137.697	76.8965	77.8644	69.9754
MEXAM1_RS09340	hypothetical protein	250.712	244.655	239.69	259.056	329.014	297.868	164.731	171.051	169.107
MEXAM1_RS09345	hypothetical protein	175.101	192.147	194.263	174.07	194.271	173.204	94.9427	95.7864	88.1899
MEXAM1_RS09350	YicC family protein	7.99441	8.29396	9.34194	8.04026	6.48165	5.43486	5.63681	5.11667	5.32771
MEXAM1_RS09355	guanylate kinase	12.5171	13.2646	15.8976	12.3267	13.736	11.5859	7.96245	10.6718	10.1447
MEXAM1_RS09360	ABC transporter ATP-binding protein	3.72305	4.93789	4.35574	4.56356	3.77988	4.72029	3.57473	3.46599	2.53804
MEXAM1_RS09365	L,D-transpeptidase	17.1267	18.8323	12.759	18.2968	15.5286	16.9287	19.3467	16.6863	19.4501
MEXAM1_RS09370	5,6-dimethylbenzimidazole synthase	3.78735	4.07479	4.64224	4.57735	3.19051	2.99123	5.35883	5.04957	4.48225
MEXAM1_RS09375	DUF2794 domain-containing protein	137.814	144.825	107.639	105.393	118.385	108.68	104.772	103.293	108.364
MEXAM1_RS09380	TonB-dependent siderophore receptor	4.84676	3.85316	4.57143	4.04935	4.50858	4.06119	5.87246	6.55652	6.42138
MEXAM1_RS09385	ketohydroxyglutarate aldolase	9.37394	8.07722	7.80287	9.76082	9.64541	8.97133	10.0546	13.2153	14.5375
MEXAM1_RS09390	phosphogluconate dehydratase	5.60426	6.03021	6.26367	5.71412	6.38262	6.23654	8.05903	8.07037	7.65653
MEXAM1_RS09395	Hsp33 family molecular chaperone	58.9451	59.8139	57.1907	59.6932	69.5293	68.5738	64.2909	56.1522	63.2993
MEXAM1_RS09400	porin	2.05366	1.79627	1.66289	1.7191	1.33365	1.46031	2.65799	2.22798	2.51205
MEXAM1_RS09405	DUF2147 domain-containing protein	418.237	345.683	371.872	222.399	228.02	232.777	583.292	590.737	542.409
MEXAM1_RS09410	nucleoside-diphosphate kinase	55.4679	48.6642	52.2838	51.6834	59.9538	55.221	63.7235	72.1767	63.0206
MEXAM1_RS09415	IS481 family transposase	7.90224	7.71787	8.17432	5.98483	4.65577	5.16353	4.69801	5.65641	3.72346
MEXAM1_RS09420	hypothetical protein	10.2295	9.79273	6.41962	6.9444	8.77869	9.15705	16.7387	20.6213	20.0697
MEXAM1_RS09425	peptidase M48	0.989219	1.82051	1.14906	1.88777	1.80674	1.5116	3.06271	1.60671	1.97458
MEXAM1_RS09430	DUF898 domain-containing protein	3.41761	2.15835	3.03911	3.44435	2.82731	3.05336	3.05637	3.90866	2.83783
MEXAM1_RS09435	DUF466 domain-containing protein	439.394	444.293	490.755	371.931	346.491	317.555	127.016	80.3302	101.987
MEXAM1_RS09440	carbon starvation protein A	25.5024	25.694	28.3329	24.4807	23.7762	23.8896	12.1248	10.4557	11.4258
MEXAM1_RS09445	hypothetical protein	4.05856	6.37965	4.04178	3.20198	3.16462	5.76908	4.32825	3.2489	3.20911
MEXAM1_RS09450	methanol dehydrogenase	9.84197	8.3078	7.30943	7.54359	10.0136	9.05943	11.2778	9.95788	11.8263
MEXAM1_RS09455	LemA family protein	31.8263	32.7874	30.2685	25.8624	41.9118	37.96	53.3911	49.4877	52.6421
MEXAM1_RS09460	SelT/SelW/SelH family protein	25.452	27.5852	31.5785	33.9476	25.5046	23.9501	27.2398	31.5374	23.312
MEXAM1_RS09465	PAS domain S-box protein	10.2348	8.71834	8.81871	9.49554	7.90476	9.23677	5.60929	5.61787	5.84794
MEXAM1_RS09470	oxidoreductase	123.869	127.671	125.559	119.733	107.993	108.148	59.8305	58.2807	52.3145
MEXAM1_RS09475	Crp/Fnr family transcriptional regulator	30.9097	33.6823	32.4473	36.9164	33.1393	28.5751	16.7961	19.8952	18.787
MEXAM1_RS09480	glycogen synthase GlgA	37.7222	39.1296	38.0795	32.2774	33.747	31.7827	54.7546	51.6917	50.5684
MEXAM1_RS09485	alpha-amylase	9.05402	10.2127	9.8206	8.23463	12.5766	11.5209	10.5065	11.2173	10.9806
MEXAM1_RS09495	alpha-amylase	4.1412	4.782	3.60613	4.36746	4.6247	5.09515	5.31993	5.15283	5.41672
MEXAM1_RS09500	glycogen/starch/alpha-glucan phosphorylase	39.4772	36.6948	37.5441	31.9008	32.7208	33.5475	47.7617	49.8993	46.8143
MEXAM1_RS09505	hypothetical protein	6.96776	26.4073	10.3836	8.25017	21.2893	11.8921	25.2108	16.1237	24.9473
MEXAM1_RS09510	IS3 family transposase	0.536229	1.22604	0.433283	0.530461	0.71224	0.841468	2.28547	2.20909	1.04059
MEXAM1_RS09520	hypothetical protein	0.667935	1.1955	1.25111	0.470342	1.4131	0.902938	5.0803	3.90074	4.91977
MEXAM1_RS09525	hypothetical protein	10.4101	8.79418	10.1204	6.95845	8.49642	6.10034	24.5286	18.1071	21.7956
MEXAM1_RS09530	PAS domain S-box protein	3.8505	3.34756	3.8076	2.79548	3.24958	3.0942	4.62197	4.91823	3.89437
MEXAM1_RS09535	glycosyl transferase	0.480027	1.22775	0.793915	1.63066	0.866487	1.04399	0.904065	1.07925	0.892656
MEXAM1_RS09540	NAD-dependent dehydratase	7.26997	6.83872	7.40428	6.34646	5.20888	5.89241	8.9077	8.55942	6.83805
MEXAM1_RS09545	FMN-dependent NADH-azoreductase	3.58713	3.2678	2.94559	3.46237	4.63602	3.18644	4.69334	3.6723	3.63026
MEXAM1_RS09550	transcriptional regulator	8.70914	8.10115	7.10132	7.40605	10.2993	8.3996	7.77346	14.1301	14.8256
MEXAM1_RS09555	polysaccharide biosynthesis protein	3.18289	3.12853	3.49202	3.59041	3.23616	3.40418	3.04972	2.70445	2.68295
MEXAM1_RS09560	DUF1206 domain-containing protein	20.8963	21.5985	20.2096	19.0731	19.7666	20.3687	13.8936	14.6134	13.6081
MEXAM1_RS09565	hypothetical protein	65.4655	53.7348	47.1765	63.1319	56.4064	56.2984	50.3157	40.329	43.7475
MEXAM1_RS09570	Uma2 family endonuclease	20.7945	19.5327	22.7253	19.1723	17.9378	18.0213	28.8283	28.1467	29.9361
MEXAM1_RS09575	Uma2 family endonuclease	11.3456	12.0473	12.8852	13.1266	9.0681	11.5309	10.941	8.94752	10.0253
MEXAM1_RS09580	homospermidine synthase	19.7044	19.5406	21.6897	18.5877	18.2925	19.8558	16.0927	15.0445	13.0446
MEXAM1_RS09585	hypothetical protein	2873.77	2798.53	3013.62	2426.94	2947.21	2806.96	12535.1	11981.5	13047.4
MEXAM1_RS09590	N-acetyltransferase	53.0643	50.4506	50.2276	45.333	51.9263	53.8944	102.363	111.935	109.68
MEXAM1_RS09595	type III PLP-dependent enzyme	14.4521	16.7071	18.1184	15.7754	20.2956	18.1335	18.2786	17.0486	17.7113
MEXAM1_RS09600	glucan biosynthesis protein G	1.9193	1.72439	1.34023	1.90207	1.69289	1.53593	2.29418	2.01835	2.42742
MEXAM1_RS09605	N-acetyltransferase	6.79811	7.14657	6.88895	5.00869	5.36688	6.47011	5.23512	3.96849	4.35042
MEXAM1_RS09610	alkene reductase	124.419	143.981	130.574	100.281	136.743	116.627	103.558	82.9297	101.54
MEXAM1_RS09615	HAD family hydrolase	4.02309	3.07253	3.73664	3.62127	3.25437	3.96219	4.3695	3.38551	5.30237
MEXAM1_RS09620	outer membrane protein assembly factor BamE	16.5047	19.8803	15.3077	14.7577	16.2758	13.8665	57.0398	50.5634	49.0507
MEXAM1_RS09625	ubiquinol-cytochrome c chaperone	8.34709	10.6995	10.0823	7.31766	7.926	11.4554	8.9431	9.31005	7.75717
MEXAM1_RS09630	metal-binding protein	10.3677	14.2239	13.5604	10.8562	11.764	10.9986	11.0546	11.8512	11.2281
MEXAM1_RS09635	phosphate acyltransferase PlsX	9.19325	11.0521	9.44676	8.45063	7.97464	7.39926	8.15234	8.08577	7.1774
MEXAM1_RS09640	ketoacyl-ACP synthase III	22.3155	22.1481	20.6251	18.4475	20.6205	19.4219	17.8712	20.9426	19.0933
MEXAM1_RS09645	integration host factor subunit alpha	88.8633	87.1395	83.3029	81.5425	66.5809	93.3269	130.264	155.18	117.25
MEXAM1_RS09650	MerR family transcriptional regulator	31.6965	24.0153	25.5128	25.4057	22.4677	27.5551	35.5993	34.973	27.0479
MEXAM1_RS09655	hypothetical protein	84.1198	82.5844	80.9497	87.5203	91.5623	77.182	39.8129	41.3907	34.8372
MEXAM1_RS09660	hypothetical protein	777.277	767.231	742.941	720.975	771.292	723.952	630.271	668.929	649.496
MEXAM1_RS09665	PrkA family serine protein kinase	177.762	185.89	188.705	152.027	166.864	158.098	192.545	191.824	182.06
MEXAM1_RS09670	hypothetical protein	72.3655	74.6541	70.7438	65.1745	63.6432	66.6892	52.1273	53.0224	54.3851
MEXAM1_RS09675	SpoVR family protein	42.7141	43.157	41.2014	37.556	36.2633	39.1444	30.034	32.41	32.265
MEXAM1_RS09680	phosphoribosylglycinamide formyltransferase	9.49483	8.46135	10.2872	8.38213	9.2784	8.7779	7.95395	7.44188	7.58088
MEXAM1_RS09685	phosphoribosylformylglycinamidine cyclo-ligase	13.8353	13.2417	14.7621	13.5316	13.599	14.2543	13.7747	14.5289	15.33
MEXAM1_RS09690	AI-2E family transporter	11.292	11.5466	10.3333	10.9945	10.7792	10.6668	10.4045	11.5275	10.5468
MEXAM1_RS09695	chromosomal replication initiator protein DnaA	12.1856	12.543	12.4928	13.0556	14.5461	12.597	18.668	19.4222	17.7404
MEXAM1_RS09700	RNA degradosome polyphosphate kinase	11.5626	11.0642	10.8955	10.9713	10.6525	11.6023	10.8987	11.0383	10.5636
MEXAM1_RS09705	exopolyphosphatase	7.96046	7.97157	9.11258	8.10008	8.44671	7.75808	8.44978	8.10846	9.15089
MEXAM1_RS09710	hypothetical protein	18.8095	13.9605	22.9399	14.83	27.1259	29.8708	64.8048	66.2241	78.3227
MEXAM1_RS09715	pyridoxal phosphate-dependent aminotransferase	27.9061	31.5725	33.5338	26.6995	28.7384	28.7577	26.0656	29.3824	24.6764
MEXAM1_RS09720	acyl CoA:acetate/3-ketoacid CoA transferase	32.8607	33.1219	31.6479	30.6958	26.6824	30.5048	26.8086	30.0287	27.4016
MEXAM1_RS09725	methyl-accepting chemotaxis protein	3.15096	2.52319	2.26293	3.17873	2.82718	2.52258	4.84574	4.19408	4.65924
MEXAM1_RS09730	30S ribosomal protein S2	107.068	118.549	118.657	108.708	105.583	109.993	115.141	114.364	105.462
MEXAM1_RS09735	elongation factor Ts	75.2306	80.0835	88.4885	78.299	73.1156	75.3455	69.9505	75.5987	70.8411
MEXAM1_RS09740	UMP kinase	12.4327	11.2493	13.7615	12.9664	15.4546	13.3587	20.31	19.9571	17.6446
MEXAM1_RS09745	inorganic diphosphatase	80.5657	83.3763	86.3641	76.755	79.2288	79.7477	127.897	122.981	114.196
MEXAM1_RS09750	N-acetyltransferase	21.3507	19.3373	21.8704	16.2284	14.6932	14.4209	15.3489	22.8529	19.1923
MEXAM1_RS09755	protein-tyrosine-phosphatase	3.40462	3.06368	2.8846	3.22122	2.42008	3.36557	2.09492	2.47834	3.3326
MEXAM1_RS09760	hypothetical protein	1.05299	1.26729	0.682821	1.12203	1.25186	0.957669	1.33326	0.802635	1.52054
MEXAM1_RS09765	UDP-3-O-(3-hydroxymyristoyl)glucosamine N-acyltransferase	2.46451	2.29685	2.40206	2.13493	3.03606	3.32537	3.90637	3.70805	4.22025
MEXAM1_RS09770	outer membrane protein assembly factor BamA	20.2889	18.9598	20.2375	15.0803	19.4673	17.8736	69.4992	58.6561	61.308
MEXAM1_RS09775	RIP metalloprotease RseP	27.169	27.5821	28.531	24.8654	23.0676	24.8762	39.5987	41.7076	36.3732
MEXAM1_RS09780	1-deoxy-D-xylulose-5-phosphate reductoisomerase	4.17508	4.96007	4.60837	3.7052	4.21784	3.65707	5.17002	5.34672	5.06336
MEXAM1_RS09785	phosphatidate cytidylyltransferase	4.31422	4.44945	4.58248	4.64109	4.28815	3.72222	4.39966	4.04947	4.78794
MEXAM1_RS09790	isoprenyl transferase	7.77108	6.32007	6.52787	6.40119	6.10902	5.54693	8.27269	8.8071	7.80082
MEXAM1_RS09795	ribosome-recycling factor	35.1885	31.1486	31.0187	30.1402	31.5801	30.7414	35.4805	32.3672	37.2861
MEXAM1_RS09800	HPP family protein	1.97175	1.99138	2.23314	2.24725	1.90072	2.15936	2.56844	2.45764	2.5081
MEXAM1_RS09805	2-octaprenyl-6-methoxyphenyl hydroxylase	12.5364	13.5598	12.9051	12.2731	11.0186	11.9292	13.1034	14.9078	11.1512
MEXAM1_RS09810	LysR family transcriptional regulator	1.99512	1.47375	2.49145	2.14087	2.23848	2.69719	2.72001	1.58216	1.92968
MEXAM1_RS09815	NAD(P)-dependent oxidoreductase	3.79578	3.31051	5.79883	4.18218	5.23065	4.63008	4.65191	4.71046	4.13644
MEXAM1_RS09820	transketolase	1.58945	2.51491	2.99944	2.13034	3.27063	2.33551	1.19497	1.64168	1.68986
MEXAM1_RS09825	transketolase	3.72021	3.274	3.90342	3.38211	3.69701	4.05995	2.53999	2.54702	2.18701
MEXAM1_RS09830	ABC transporter substrate-binding protein	3.01194	4.67344	2.65671	6.9119	4.8132	5.53136	3.67369	3.16401	3.94313
MEXAM1_RS09835	ABC transporter permease	95.8653	87.0136	89.5034	83.639	90.0164	85.2646	218.83	244.831	220.044
MEXAM1_RS09840	transporter	1.88549	2.38045	2.46141	3.09019	2.4835	3.10036	3.55785	3.0238	3.79317
MEXAM1_RS09845	nuclease	1.07563	1.09819	0.973013	1.1276	1.08873	1.21951	0.88069	0.901131	0.895356
MEXAM1_RS09850	acyl-CoA thioesterase II	3.76583	3.72182	4.31143	2.80136	3.8334	3.84942	4.32399	3.92023	3.08284
MEXAM1_RS09855	nitrogen regulatory protein P-II 1	13.3639	9.1252	10.5293	14.9992	13.5733	12.7462	27.8071	23.4461	17.0885
MEXAM1_RS09860	ammonium transporter	3.81106	3.37867	3.14888	3.39547	3.89722	2.54829	3.74182	4.30816	4.45528
MEXAM1_RS09865	porin	1.59498	1.51616	1.25804	0.964378	1.62705	1.54512	2.64778	2.05626	2.03287
MEXAM1_RS09870	DNA translocase FtsK	2.39615	2.02979	2.20019	2.5576	2.3032	2.33061	6.77475	5.17635	6.62792
MEXAM1_RS09875	TonB-dependent receptor	5.14151	4.41082	4.30106	4.26443	5.16576	4.64535	4.72548	4.94618	5.7389
MEXAM1_RS09880	PAS domain S-box protein	6.30752	5.86644	6.02841	6.17647	5.45569	5.94548	4.83119	4.64436	4.926
MEXAM1_RS09885	Hypothetical protein, formate dehydrogenase subunit B, Fdh4B	199.877	200.783	194.907	156.74	144.133	157.612	84.0176	81.11	66.9501
MEXAM1_RS09890	Oxidoreductase, formate dehydrogenase subunit A, Fdh4A	176.778	192.989	193.265	165.574	163.033	167.405	84.7582	80.6121	80.845
MEXAM1_RS09895	quinone-dependent dihydroorotate dehydrogenase	4.41247	5.71526	4.49761	5.68	4.51982	3.67356	4.84861	3.61193	4.61102
MEXAM1_RS09900	DUF952 domain-containing protein	12.9078	14.9441	10.438	10.4757	9.38288	14.7642	11.8688	12.6359	15.691
MEXAM1_RS09905	helix-turn-helix transcriptional regulator	27.7196	30.7799	31.6979	28.004	30.5807	34.4274	53.3784	55.1273	49.9008
MEXAM1_RS09910	hypothetical protein	50.4716	59.4269	51.3526	65.1214	74.0554	65.1106	87.5262	79.1134	79.0409
MEXAM1_RS09915	DUF3126 domain-containing protein	434.119	425.427	426.115	405.478	440.847	438.881	323.742	340.931	325.114
MEXAM1_RS09920	serine O-acetyltransferase	67.1353	77.5107	75.8192	70.5294	77.0414	73.2036	60.9978	54.0112	61.5109
MEXAM1_RS09925	helix-turn-helix domain-containing protein	102.566	111.1	105.36	103.069	107.039	105.492	89.6272	85.7062	93.4158
MEXAM1_RS09930	two-component sensor histidine kinase	1.86772	1.41985	1.36142	1.35679	1.67664	1.57214	1.82928	1.23111	1.79371
MEXAM1_RS09935	hypothetical protein	10.9369	14.5907	11.4437	15.9073	17.6514	15.438	19.6683	14.9874	13.111
MEXAM1_RS09940	hypothetical protein	16.4611	14.5738	21.8204	15.2357	16.2471	11.5019	30.0807	25.9684	32.0701
MEXAM1_RS09945	DNA-binding response regulator	4.4866	4.06316	3.9848	4.88607	4.38575	5.32259	6.71552	7.43097	8.67317
MEXAM1_RS09950	DUF3369 domain-containing protein	7.95027	8.48398	8.73073	7.58678	6.91234	6.6026	7.91178	7.92234	7.53443
MEXAM1_RS09955	glyoxalase/bleomycin resistance/dioxygenase family protein	11.3971	9.58856	11.0977	11.221	9.55716	6.4088	11.6712	13.9774	12.6643
MEXAM1_RS09960	cobalamin biosynthesis protein CobW	15.5174	15.6575	21.0623	15.2947	21.7358	9.34827	7.85328	12.5289	8.12933
MEXAM1_RS09965	Crp/Fnr family transcriptional regulator	21.5168	15.4545	19.7309	16.388	17.1915	15.7893	11.4466	11.3232	12.6622
MEXAM1_RS09970	PepSY domain-containing protein	4.60749	4.77506	4.1014	5.04083	4.53877	4.70059	5.15331	5.11603	3.64709
MEXAM1_RS09975	TonB-dependent siderophore receptor	1.71905	1.63097	1.53262	1.97647	1.94216	1.85654	2.58525	3.09142	2.39471
MEXAM1_RS09980	hypothetical protein	6.85569	6.75688	7.26066	7.93744	7.51804	9.83891	7.06098	6.37864	7.89118
MEXAM1_RS09985	sulfite oxidase-like oxidoreductase	29.1843	28.5777	30.092	33.2495	28.4026	29.528	16.8466	18.3017	14.4772
MEXAM1_RS09990	oxidoreductase	11.0466	9.56706	8.86309	10.604	9.56102	9.14114	6.20597	6.50035	6.58149
MEXAM1_RS09995	TIGR02300 family protein	80.7354	70.8963	77.1381	84.7486	82.0368	75.7998	67.3995	80.1311	79.0723
MEXAM1_RS10000	hypothetical protein	86.9837	97.6258	74.8077	142.239	116.134	118.363	149.723	162.007	148.742
MEXAM1_RS10005	3-phosphoshikimate 1-carboxyvinyltransferase	8.09321	8.21568	9.44509	8.45134	7.57442	7.72446	7.97821	7.5112	7.58991
MEXAM1_RS10010	(d)CMP kinase	8.18366	6.20947	8.36928	8.31342	7.39182	6.78866	5.63777	5.73944	6.92196
MEXAM1_RS10015	hypothetical protein	8.43328	6.05869	9.57839	16.4735	13.7542	11.6228	13.0092	9.55984	12.6795
MEXAM1_RS10020	tRNA-Thr	10.1889	2.29981	5.59036	12.5187	5.79219	7.17262	19.3772	18.2075	17.2156
MEXAM1_RS10025	hypothetical protein	4.8843	5.36832	5.49159	6.82965	5.77621	5.50026	3.75602	3.18157	4.67807
MEXAM1_RS10030	glycosyltransferase	3.55452	2.83793	2.21415	2.57167	3.29808	3.31098	2.77854	2.48057	2.64274
MEXAM1_RS10035	creatininase	4.0395	5.0101	4.24786	5.73207	6.39595	7.35314	4.60126	3.05919	3.20361
MEXAM1_RS10040	sensor domain-containing diguanylate cyclase	20.5724	20.1527	25.3165	28.5565	21.0039	22.5734	5.41579	5.44178	5.66519
MEXAM1_RS10045	CsbD family protein	226.71	224.361	251.287	301.892	248.218	255.6	69.2075	62.0741	67.3622
MEXAM1_RS10050	CsbD family protein	11731.6	11732.4	12847.5	18182	18286.8	15467.2	2327	1694.82	2354.74
MEXAM1_RS10055	oxalate/formate MFS antiporter	5.61199	5.34468	6.29449	4.95475	4.28339	4.04711	3.40135	3.58094	3.1372
MEXAM1_RS10060	DUF2437 domain-containing protein	6.83029	5.35658	6.51966	6.22629	3.78827	4.49637	4.77355	5.48235	4.41645
MEXAM1_RS10065	2-dehydropantoate 2-reductase	12.0085	12.2642	13.1048	12.3926	11.2655	10.2507	7.74115	8.29122	8.11646
MEXAM1_RS10070	AMP-dependent synthetase	19.5486	19.7019	20.7682	19.2979	16.1499	16.0769	13.4237	12.7416	11.8241
MEXAM1_RS10075	hypothetical protein	88.5052	73.2236	72.3867	48.0123	44.4873	50.0978	183.291	143.339	152.499
MEXAM1_RS10080	hypothetical protein	52.3074	53.4906	60.4089	43.6184	64.6271	51.4871	171.914	145.164	134.321
MEXAM1_RS10085	hypothetical protein	28.7839	26.8304	23.1412	19.754	19.5565	19.3089	51.3386	48.5071	51.9556
MEXAM1_RS10090	MFS transporter	1.98637	1.32241	2.1928	2.39173	2.10281	2.158	1.52918	1.56289	1.87324
MEXAM1_RS10095	LysR family transcriptional regulator	5.09756	6.09358	4.83451	4.91266	5.44321	5.26078	4.11519	3.88433	4.89943
MEXAM1_RS10100	tautomerase family protein	37.134	44.9231	35.5452	36.2353	46.8495	40.0375	48.8322	40.142	40.1873
MEXAM1_RS10105	CoA ester lyase	44.8652	43.9462	47.182	37.2797	40.9589	41.6857	40.1148	41.1529	37.4114
MEXAM1_RS10110	hypothetical protein	2928.28	2983.34	3127.63	3278.81	3097.89	2946.15	1759.15	1716.84	1732.27
MEXAM1_RS10115	HAD family hydrolase	12.8642	16.5099	13.2749	18.4691	17.5969	16.7345	8.06234	6.61109	5.8485
MEXAM1_RS10120	hypothetical protein	1.46814	1.15119	1.66603	1.40019	1.26476	1.07727	1.33763	0.68082	1.47477
MEXAM1_RS10125	DUF4194 domain-containing protein	0.720595	0.612848	0.526409	0.360871	1.48867	0.805212	0.69003	1.32085	1.07433
MEXAM1_RS10130	LysR family transcriptional regulator	1.36119	0.994502	1.2858	0.91302	0.685881	1.50258	1.72083	1.58796	2.21822
MEXAM1_RS10135	ring-cleaving dioxygenase	5.98198	6.2569	4.26869	6.01705	5.09788	4.7251	3.70708	4.6087	4.55194
MEXAM1_RS10140	hydrolase	5.61241	4.66907	5.61407	2.56586	4.3029	3.271	3.50512	3.6697	3.54732
MEXAM1_RS10145	hypothetical protein	21.1334	18.7163	16.0474	16.1688	13.1044	11.5002	41.0631	34.2307	37.7157
MEXAM1_RS10150	ATPase	2.15409	1.81574	2.00714	1.62867	1.61885	2.02742	2.31156	2.87375	2.46872
MEXAM1_RS10155	30S ribosomal protein S12	178.929	206.081	185.176	191.402	169.062	167.303	330.653	373.664	350.385
MEXAM1_RS10160	30S ribosomal protein S7	135.889	136.507	145.222	133.398	141.173	130.311	245.847	247.31	239.073
MEXAM1_RS10165	elongation factor G	74.9186	84.105	84.2177	74.7067	74.2942	74.3748	138.393	150.944	128.363
MEXAM1_RS10170	elongation factor Tu	240.053	245.508	245.046	207.092	208.116	200.935	324.562	328.633	304.912
MEXAM1_RS10175	30S ribosomal protein S10	289.214	301.616	282.921	268.46	290.437	271.527	428.623	443.756	422.399
MEXAM1_RS10180	50S ribosomal protein L3	126.815	129.714	130.939	112.618	114.906	106.704	181.592	191.995	168.868
MEXAM1_RS10185	50S ribosomal protein L4	103.738	101.178	103.764	84.3435	87.285	87.3209	136.276	145.918	133.26
MEXAM1_RS10190	50S ribosomal protein L23	270.877	243.919	211.443	215.604	193.135	170.547	269.953	293.306	275.25
MEXAM1_RS10195	50S ribosomal protein L2	133.719	123.241	133.19	116.09	115.253	112.705	168.634	171.534	158.644
MEXAM1_RS10200	30S ribosomal protein S19	241.052	212.282	230.513	243.661	213.41	189.125	293.636	278.57	281.461
MEXAM1_RS10205	50S ribosomal protein L22	245.211	223.733	215.295	205.038	203.249	181.689	279.116	289.494	259.747
MEXAM1_RS10210	30S ribosomal protein S3	213.481	200.149	207.863	185.966	179.084	180.937	223.178	231.442	225.49
MEXAM1_RS10215	50S ribosomal protein L16	302.355	283.273	319.33	267.15	225.308	238.036	298.228	311.215	296.871
[truncated: 4,536 more rows]
